# Supplementary material for: The Identification of RNA Modification Gene PUS7 as a Potential Biomarker of Ovarian Cancer
Source: MDPI journal article supplement (doi:10.3390/biology10111130), 2021-11-03
Supplement: s1 [file s1]

**Table S2.** The baseline characteristics of ovarian cancer samples in a tissue array.

| Variable                  | N (%)      | Median (IHC score) | <i>p</i> -value |
|---------------------------|------------|--------------------|-----------------|
| <b>Age</b>                |            |                    |                 |
| ≤60                       | 44 (68.7%) | 8                  | 0.861           |
| >60                       | 18 (28.1%) | 8                  |                 |
| NA                        | 2 (3.2%)   |                    |                 |
| <b>Lymphatic invasion</b> |            |                    |                 |
| No                        | 60 (93.8%) | 8                  | 0.165           |
| Yes                       | 4 (6.2%)   | 5.5                |                 |
| <b>Pathological type</b>  |            |                    |                 |
| Serous ovarian cancer     | 38 (59.3%) | 8                  | 0.650           |
| Mucinous cancer           | 7 (10.9%)  | 9                  |                 |
| Endometrial cancer        | 4 (6.3%)   | 10                 |                 |
| Ovarian clear cell cancer | 4 (6.3%)   | 9.5                |                 |
| Other                     | 11 (17.2%) | 7                  |                 |
| <b>Clinical stage</b>     |            |                    |                 |
| I, I-II, II               | 35 (54.7%) | 8                  | 0.972           |
| II-III, III               | 19 (29.7%) | 8                  |                 |
| NA                        | 10 (15.6%) |                    |                 |
| <b>Tumor location</b>     |            |                    |                 |
| Bilateral ovaries         | 14 (21.9%) | 8                  | 0.700           |
| Unilateral ovarian        | 47 (73.4%) | 8                  |                 |
| NA                        | 3 (4.7%)   |                    |                 |

NA: Clinical information is not available.
