# Supplementary material for: The Identification of RNA Modification Gene PUS7 as a Potential Biomarker of Ovarian Cancer
Source: Biology (Basel). 2021 Nov 3;10(11):1130. doi: 10.3390/biology10111130 (PMC8615213; doi:10.3390/biology10111130)
Supplement: Supplementary file 1 [file biology-10-01130-s001.zip]

Archive with 4 entries (4 files):
- Supplementary files/biology-1421131 supplementary English.pdf
- Supplementary files/Supplementary table1.xls
- Supplementary files/Supplementary table3.xlsx
- Supplementary files/Supplementary table4.xls
