# Supplementary material for: The Identification of RNA Modification Gene PUS7 as a Potential Biomarker of Ovarian Cancer
Source: Biology (Basel). 2021 Nov 3;10(11):1130. doi: 10.3390/biology10111130 (PMC8615213; doi:10.3390/biology10111130)
Supplement: Supplementary file 1 [file biology-10-01130-s001.zip › Supplementary files/Supplementary table1.xls]

## Sheet: TCGA DEGs
The differential expressed genes in ovarian cancer samples compared with normal according to TCGA data.
row.names(tT)	logFC	AveExpr	t	P.Value	adj.P.Val	B	regulated
GINS1	3.48999	7.85742	11.992	8.06893e-30	1.61943e-27	56.8902	Up-Regulated
ZWINT	3.10378	7.94728	11.08	4.62782e-26	7.23744e-24	48.3395	Up-Regulated
UBE2C	3.57993	8.83152	10.8412	4.15442e-25	6.17624e-23	46.1725	Up-Regulated
SMC4	2.79479	7.99296	10.789	6.68408e-25	9.81582e-23	45.7031	Up-Regulated
NUSAP1	3.34489	7.61613	10.7586	8.80624e-25	1.26244e-22	45.4309	Up-Regulated
BUB1B	2.86508	6.60293	10.4141	1.9428e-23	2.75237e-21	42.3776	Up-Regulated
MELK	3.39851	6.80397	10.3245	4.29787e-23	6.01802e-21	41.5943	Up-Regulated
RACGAP1	2.86859	7.70473	10.2379	9.21277e-23	1.24652e-20	40.8422	Up-Regulated
TOP2A	3.856	7.57224	10.2306	9.82605e-23	1.31473e-20	40.7786	Up-Regulated
TTK	3.70861	6.97474	10.189	1.41477e-22	1.87216e-20	40.4191	Up-Regulated
TPX2	3.70511	7.61897	10.0233	5.9871e-22	7.51006e-20	38.9964	Up-Regulated
CCNB2	3.30547	7.63069	9.90145	1.71052e-21	2.08062e-19	37.9614	Up-Regulated
CDC20	3.5098	7.58149	9.85771	2.48809e-21	2.9374e-19	37.5921	Up-Regulated
CKS2	2.65711	9.59862	9.79198	4.36028e-21	5.01431e-19	37.0391	Up-Regulated
MEMO1	1.9469	7.60197	9.7419	6.67388e-21	7.58178e-19	36.6196	Up-Regulated
ECT2	3.21943	7.17351	9.44178	8.28208e-20	8.59765e-18	34.1383	Up-Regulated
ASPM	3.34716	6.5347	9.42512	9.50923e-20	9.78719e-18	34.0022	Up-Regulated
AURKA	2.1789	6.24723	9.39604	1.20975e-19	1.23456e-17	33.7651	Up-Regulated
PTTG1	2.76748	9.21626	9.16878	7.79188e-19	7.38817e-17	31.9311	Up-Regulated
PRC1	2.98577	7.07037	8.98304	3.48414e-18	3.13105e-16	30.4572	Up-Regulated
KPNA2	2.63234	8.93215	8.98054	3.5543e-18	3.17044e-16	30.4376	Up-Regulated
CKAP2	2.34806	6.7135	8.93178	5.24629e-18	4.61138e-16	30.0545	Up-Regulated
ORC6L	2.11091	6.41976	8.80262	1.46034e-17	1.24719e-15	29.0475	Up-Regulated
KIAA0101	2.30465	7.17413	8.74366	2.32165e-17	1.94148e-15	28.5916	Up-Regulated
ACTL6A	2.04171	7.80184	8.65632	4.59417e-17	3.73804e-15	27.9206	Up-Regulated
RAD51AP1	3.02939	6.5983	8.65247	4.73403e-17	3.82599e-15	27.8911	Up-Regulated
CDC2	2.96765	7.12732	8.50559	1.47398e-16	1.16774e-14	26.7748	Up-Regulated
CCNB1	2.87929	7.92809	8.50036	1.53442e-16	1.20768e-14	26.7353	Up-Regulated
KIF20A	3.03855	6.64037	8.47143	1.9155e-16	1.47862e-14	26.5173	Up-Regulated
PBK	3.35657	6.7012	8.40025	3.29838e-16	2.4518e-14	25.9834	Up-Regulated
TK1	2.30784	5.68821	8.33889	5.2544e-16	3.72197e-14	25.526	Up-Regulated
C20orf20	1.53382	6.17398	8.30991	6.54127e-16	4.55318e-14	25.3109	Up-Regulated
CDC73	1.81491	6.33087	8.22782	1.21262e-15	8.15774e-14	24.7048	Up-Regulated
ATAD2	2.82431	6.20691	8.22197	1.26689e-15	8.4755e-14	24.6618	Up-Regulated
RALA	1.80035	7.1005	8.16	2.01209e-15	1.32402e-13	24.2076	Up-Regulated
CEP55	2.81466	6.21079	8.14814	2.19777e-15	1.43835e-13	24.121	Up-Regulated
MCM6	2.16434	8.22763	8.14129	2.31248e-15	1.50524e-13	24.071	Up-Regulated
KIAA0907	1.75776	8.42094	8.12244	2.65973e-15	1.72196e-13	23.9337	Up-Regulated
DKFZp762E1312	2.36842	6.12163	8.03826	4.95355e-15	3.12307e-13	23.3234	Up-Regulated
PYCR1	1.62923	5.70098	8.03027	5.25322e-15	3.29475e-13	23.2658	Up-Regulated
DDX39	2.11718	8.52956	7.94056	1.01301e-14	6.22384e-13	22.6216	Up-Regulated
CENPA	2.37465	5.81775	7.9259	1.12709e-14	6.82029e-13	22.5169	Up-Regulated
DTL	2.39507	5.92573	7.92215	1.15831e-14	6.97421e-13	22.4901	Up-Regulated
STIL	2.31452	6.02433	7.86817	1.71359e-14	1.00659e-12	22.106	Up-Regulated
RRM2	3.05967	7.9426	7.82605	2.32272e-14	1.33746e-12	21.8078	Up-Regulated
CENPF	2.56894	6.45536	7.79216	2.9639e-14	1.68355e-12	21.5688	Up-Regulated
TAF2	1.63277	7.76786	7.77698	3.30481e-14	1.86838e-12	21.4621	Up-Regulated
E2F3	1.49906	6.37282	7.77338	3.39143e-14	1.90839e-12	21.4367	Up-Regulated
MCM2	2.0928	7.59914	7.70258	5.62299e-14	3.12037e-12	20.9411	Up-Regulated
SLMO2	2.00573	7.81984	7.65343	7.9706e-14	4.32351e-12	20.5993	Up-Regulated
BIRC5	2.42725	5.99914	7.65175	8.06599e-14	4.35563e-12	20.5876	Up-Regulated
TOPBP1	1.79773	7.9061	7.64231	8.62256e-14	4.6354e-12	20.5222	Up-Regulated
LRRC40	1.70092	6.99925	7.62959	9.43422e-14	5.0492e-12	20.4341	Up-Regulated
TIA1	1.74828	6.9379	7.59359	1.21595e-13	6.39407e-12	20.1855	Up-Regulated
KIFC1	1.74766	5.57161	7.48029	2.68603e-13	1.37639e-11	19.4093	Up-Regulated
DLG7	2.87512	6.1886	7.45245	3.25878e-13	1.64194e-11	19.2201	Up-Regulated
ZWILCH	2.09062	6.18169	7.44866	3.34549e-13	1.6786e-11	19.1943	Up-Regulated
CDKN3	2.94821	6.6004	7.41674	4.17204e-13	2.06606e-11	18.9782	Up-Regulated
PSMA7	1.34577	8.73151	7.38566	5.16916e-13	2.53037e-11	18.7684	Up-Regulated
KIF2C	2.29979	5.81178	7.3848	5.19988e-13	2.5351e-11	18.7626	Up-Regulated
GNPDA1	1.39877	7.36057	7.34236	6.959e-13	3.35201e-11	18.4775	Up-Regulated
ESPL1	2.00145	5.94921	7.32472	7.85174e-13	3.73718e-11	18.3594	Up-Regulated
EZH2	2.56614	6.1537	7.30072	9.25056e-13	4.38564e-11	18.199	Up-Regulated
TACC3	2.0362	5.97938	7.27154	1.12836e-12	5.32851e-11	18.0046	Up-Regulated
RPN1	1.40898	9.01253	7.26112	1.21114e-12	5.69709e-11	17.9354	Up-Regulated
FANCI	2.25787	6.02289	7.20636	1.75459e-12	8.06443e-11	17.5728	Up-Regulated
PSRC1	2.29747	5.9075	7.20203	1.80664e-12	8.24074e-11	17.5442	Up-Regulated
RFC4	2.18294	8.38975	7.19252	1.92617e-12	8.71989e-11	17.4816	Up-Regulated
GPR172A	1.84657	5.99969	7.17336	2.19142e-12	9.81008e-11	17.3554	Up-Regulated
MARS	1.44669	7.96568	7.10978	3.35515e-12	1.49087e-10	16.939	Up-Regulated
MLF1IP	2.57361	7.40974	7.05893	4.70672e-12	2.06855e-10	16.6082	Up-Regulated
NCAPD2	2.43467	7.01956	6.97741	8.06532e-12	3.44406e-10	16.082	Up-Regulated
KLHL24	1.82407	6.81733	6.90992	1.25482e-11	5.28339e-10	15.6503	Up-Regulated
TTF2	1.51031	5.31866	6.90895	1.26278e-11	5.29839e-10	15.6441	Up-Regulated
HMMR	2.51858	6.24094	6.90286	1.31389e-11	5.48643e-10	15.6054	Up-Regulated
SUPV3L1	1.39711	6.55323	6.90254	1.31671e-11	5.48643e-10	15.6033	Up-Regulated
MTHFD2	1.61982	8.12668	6.88138	1.51107e-11	6.27459e-10	15.4689	Up-Regulated
KIF23	2.33842	5.53881	6.87704	1.5544e-11	6.43234e-10	15.4413	Up-Regulated
KIF11	2.35229	5.91688	6.81998	2.24927e-11	9.21282e-10	15.0806	Up-Regulated
ASNS	2.25044	7.61911	6.8023	2.52088e-11	1.0221e-09	14.9693	Up-Regulated
XPOT	1.53908	8.42999	6.79563	2.63139e-11	1.06333e-09	14.9275	Up-Regulated
NDC80	2.37163	5.89381	6.776	2.98532e-11	1.19037e-09	14.8043	Up-Regulated
SFRS11	1.08414	8.74817	6.75802	3.35028e-11	1.33149e-09	14.6918	Up-Regulated
IFRD1	1.82475	6.56875	6.68272	5.4151e-11	2.1035e-09	14.2234	Up-Regulated
VEGFA	1.87468	6.51789	6.63998	7.09791e-11	2.6794e-09	13.9596	Up-Regulated
STMN1	1.74062	6.99923	6.62728	7.69037e-11	2.87601e-09	13.8814	Up-Regulated
WDR12	1.33351	8.06794	6.57522	1.06662e-10	3.91591e-09	13.5626	Up-Regulated
SP3	1.11701	8.64065	6.57245	1.08534e-10	3.97253e-09	13.5456	Up-Regulated
MCM7	1.75438	7.11934	6.55573	1.20493e-10	4.38363e-09	13.4438	Up-Regulated
LMNB1	1.83125	5.6235	6.54081	1.32262e-10	4.78288e-09	13.3529	Up-Regulated
OIP5	2.01437	5.34537	6.52722	1.43948e-10	5.18988e-09	13.2705	Up-Regulated
PRAME	3.47232	6.75214	6.5182	1.52255e-10	5.46672e-09	13.2158	Up-Regulated
MCM4	1.63618	5.53637	6.51791	1.52534e-10	5.46672e-09	13.214	Up-Regulated
TPD52L2	1.24722	7.62465	6.50362	1.66695e-10	5.9389e-09	13.1275	Up-Regulated
GGH	2.83685	7.67623	6.49066	1.80646e-10	6.39805e-09	13.0492	Up-Regulated
C1orf135	1.65999	5.26108	6.48222	1.90343e-10	6.72171e-09	12.9983	Up-Regulated
CBX3	1.14615	9.13778	6.44629	2.37646e-10	8.27091e-09	12.7821	Up-Regulated
DBF4	1.46781	6.09764	6.43933	2.48042e-10	8.60139e-09	12.7405	Up-Regulated
SLC25A36	1.26075	8.4334	6.43893	2.48656e-10	8.60139e-09	12.738	Up-Regulated
UCK2	1.48967	6.36608	6.41571	2.86807e-10	9.72881e-09	12.5991	Up-Regulated
SPAG5	1.69645	5.67585	6.41407	2.89723e-10	9.80012e-09	12.5892	Up-Regulated
YEATS2	1.10814	6.35528	6.41319	2.91292e-10	9.8256e-09	12.584	Up-Regulated
DEPDC1	2.28908	5.35419	6.41073	2.95722e-10	9.94717e-09	12.5693	Up-Regulated
MRPL19	1.43068	6.84124	6.40438	3.07456e-10	1.02844e-08	12.5314	Up-Regulated
UBE2S	1.937	6.67726	6.37346	3.71467e-10	1.2289e-08	12.3473	Up-Regulated
NSUN5B	2.01068	6.83064	6.3719	3.75029e-10	1.23729e-08	12.338	Up-Regulated
MFN1	1.4621	6.15519	6.36649	3.87613e-10	1.27531e-08	12.3059	Up-Regulated
FLAD1	1.20888	6.0051	6.36321	3.95441e-10	1.29752e-08	12.2864	Up-Regulated
ALG3	1.27095	6.34797	6.35547	4.14535e-10	1.3528e-08	12.2405	Up-Regulated
CCNE1	2.76336	6.75381	6.33848	4.59673e-10	1.49605e-08	12.1399	Up-Regulated
FOXM1	1.40753	5.30398	6.33721	4.63243e-10	1.5036e-08	12.1324	Up-Regulated
NMU	3.27195	7.82495	6.33254	4.76585e-10	1.54275e-08	12.1048	Up-Regulated
TROAP	1.6292	5.36374	6.29225	6.08268e-10	1.94808e-08	11.8674	Up-Regulated
FAM136A	1.19496	7.82489	6.27836	6.61452e-10	2.1072e-08	11.7859	Up-Regulated
ARMC1	1.56858	7.45266	6.26766	7.05491e-10	2.22979e-08	11.7232	Up-Regulated
ASF1B	2.04866	5.94807	6.26573	7.13732e-10	2.24994e-08	11.7119	Up-Regulated
TNFRSF12A	1.60761	6.31014	6.25523	7.60279e-10	2.37799e-08	11.6505	Up-Regulated
SUMO4	1.0371	7.04405	6.25279	7.71519e-10	2.40583e-08	11.6362	Up-Regulated
MPHOSPH1	1.04518	4.83276	6.23058	8.8149e-10	2.72177e-08	11.5066	Up-Regulated
HIST3H2A	2.46679	7.32524	6.22729	8.9906e-10	2.76892e-08	11.4874	Up-Regulated
DCC1	1.20095	4.95246	6.20183	1.04684e-09	3.19139e-08	11.3395	Up-Regulated
RNF7	1.22052	7.1937	6.18185	1.17924e-09	3.49763e-08	11.2237	Up-Regulated
CDCA3	2.1289	5.53669	6.16044	1.33923e-09	3.93341e-08	11.1001	Up-Regulated
RIF1	1.22478	5.11451	6.14705	1.44989e-09	4.24808e-08	11.0229	Up-Regulated
PCNA	1.52632	8.53672	6.13954	1.51585e-09	4.41983e-08	10.9797	Up-Regulated
NCBP2	1.31637	7.0388	6.13373	1.56889e-09	4.55243e-08	10.9463	Up-Regulated
KIF14	1.49534	4.9117	6.13292	1.57634e-09	4.56305e-08	10.9417	Up-Regulated
TAF11	1.50945	6.82532	6.12918	1.61158e-09	4.64275e-08	10.9202	Up-Regulated
SLC5A6	1.39394	6.26983	6.12816	1.62135e-09	4.65974e-08	10.9143	Up-Regulated
TMEM48	1.81244	5.78444	6.12575	1.64464e-09	4.71542e-08	10.9005	Up-Regulated
C12orf11	1.5359	7.47714	6.12294	1.67211e-09	4.77253e-08	10.8844	Up-Regulated
PAK1IP1	1.36837	7.00574	6.1229	1.67249e-09	4.77253e-08	10.8841	Up-Regulated
PTPLB	1.39821	7.82624	6.11812	1.7204e-09	4.89766e-08	10.8567	Up-Regulated
CDCA8	1.92292	6.10176	6.07438	2.22524e-09	6.2317e-08	10.6068	Up-Regulated
TIMELESS	1.81691	6.22616	6.05432	2.50281e-09	6.97002e-08	10.4926	Up-Regulated
RAD21	1.24429	9.19137	6.04794	2.59782e-09	7.15857e-08	10.4564	Up-Regulated
XRCC2	1.33435	5.17576	6.02307	3.00348e-09	8.16432e-08	10.3156	Up-Regulated
MEST	2.33407	9.50992	6.01933	3.06969e-09	8.30679e-08	10.2944	Up-Regulated
NCAPD3	1.2503	5.80845	5.98025	3.85134e-09	1.03754e-07	10.0742	Up-Regulated
MAD2L1	2.17704	7.24173	5.97878	3.88438e-09	1.0441e-07	10.0659	Up-Regulated
PPP1R14B	1.47343	7.30913	5.97795	3.90306e-09	1.04679e-07	10.0613	Up-Regulated
CHCHD3	1.16202	8.37601	5.93687	4.94716e-09	1.32093e-07	9.83127	Up-Regulated
PAIP1	1.19536	7.90795	5.9295	5.16135e-09	1.37203e-07	9.79015	Up-Regulated
C5orf13	2.17965	7.37343	5.92782	5.21167e-09	1.38236e-07	9.78074	Up-Regulated
FAM64A	1.7858	5.62165	5.92595	5.26796e-09	1.39422e-07	9.77032	Up-Regulated
TMEM165	1.41658	8.14768	5.9158	5.58402e-09	1.47462e-07	9.71381	Up-Regulated
KIF15	1.85723	5.03016	5.8964	6.2406e-09	1.64081e-07	9.60599	Up-Regulated
DSN1	1.19059	5.16141	5.88691	6.58841e-09	1.72473e-07	9.55339	Up-Regulated
DBN1	1.32647	6.32772	5.87849	6.91275e-09	1.8018e-07	9.5068	Up-Regulated
PRKCI	1.52472	7.80418	5.87451	7.07163e-09	1.83527e-07	9.48476	Up-Regulated
CHEK1	1.73364	4.8431	5.85533	7.88807e-09	2.02102e-07	9.37883	Up-Regulated
PAPD1	1.20879	6.76019	5.85139	8.0669e-09	2.06246e-07	9.3571	Up-Regulated
CENPE	1.39707	4.60479	5.84841	8.2046e-09	2.09322e-07	9.34069	Up-Regulated
CCDC90A	1.43129	8.27072	5.837	8.75383e-09	2.22862e-07	9.27788	Up-Regulated
PDSS1	1.25032	5.34629	5.80472	1.05083e-08	2.65285e-07	9.10084	Up-Regulated
CCNA2	2.11462	5.51526	5.77143	1.2676e-08	3.18009e-07	8.91914	Up-Regulated
SS18L1	1.52338	6.04954	5.76771	1.29433e-08	3.23079e-07	8.89892	Up-Regulated
YTHDF2	1.00756	8.46687	5.7675	1.29586e-08	3.23079e-07	8.89778	Up-Regulated
NEK2	1.39814	5.04354	5.76097	1.34423e-08	3.33757e-07	8.86228	Up-Regulated
NCAPH	1.36136	5.07749	5.75893	1.3597e-08	3.36904e-07	8.8512	Up-Regulated
DAZAP1	1.03092	6.78714	5.75546	1.38643e-08	3.41419e-07	8.83234	Up-Regulated
C21orf45	1.42695	6.60358	5.75421	1.39617e-08	3.43116e-07	8.82556	Up-Regulated
EXO1	1.53121	5.02185	5.74118	1.50187e-08	3.66297e-07	8.75488	Up-Regulated
PRCC	1.31084	6.30688	5.72608	1.63418e-08	3.95951e-07	8.67312	Up-Regulated
TCERG1	1.09741	7.40426	5.71858	1.70394e-08	4.112e-07	8.63264	Up-Regulated
BOP1	1.15445	5.38589	5.71453	1.74292e-08	4.19765e-07	8.61074	Up-Regulated
CDC45L	1.40206	5.07485	5.71254	1.76229e-08	4.22739e-07	8.60004	Up-Regulated
CDC7	2.04657	5.56984	5.70184	1.87049e-08	4.45147e-07	8.54235	Up-Regulated
TYMS	2.04465	7.91453	5.69333	1.96113e-08	4.65797e-07	8.49654	Up-Regulated
NRAS	1.94033	6.528	5.68893	2.00955e-08	4.75422e-07	8.47293	Up-Regulated
PRPF39	1.10153	5.23666	5.67133	2.21562e-08	5.21104e-07	8.37844	Up-Regulated
EFNA4	1.43568	6.16348	5.65944	2.36624e-08	5.50082e-07	8.3148	Up-Regulated
ENC1	2.24808	6.58289	5.6538	2.44115e-08	5.64229e-07	8.28463	Up-Regulated
SFN	2.55166	7.77438	5.65343	2.44611e-08	5.64292e-07	8.28267	Up-Regulated
NCAPG	1.67986	5.06358	5.64283	2.59344e-08	5.93731e-07	8.22608	Up-Regulated
ABI2	1.1638	5.81258	5.63837	2.65805e-08	6.05072e-07	8.20227	Up-Regulated
DHFR	1.47761	5.89967	5.60947	3.11569e-08	7.02605e-07	8.04859	Up-Regulated
CDCA4	1.24981	6.25037	5.60365	3.21685e-08	7.24062e-07	8.01769	Up-Regulated
GMPS	1.22447	8.76779	5.59643	3.34651e-08	7.51842e-07	7.97947	Up-Regulated
UCHL5	1.10452	5.46508	5.59163	3.43576e-08	7.69024e-07	7.95401	Up-Regulated
MTF2	1.14803	6.04759	5.58922	3.4812e-08	7.76308e-07	7.94131	Up-Regulated
HN1	1.76943	7.81377	5.58555	3.55186e-08	7.89142e-07	7.92188	Up-Regulated
FAM49B	1.22192	7.45073	5.58246	3.61225e-08	7.98142e-07	7.90557	Up-Regulated
AURKB	1.46736	5.36602	5.57975	3.66624e-08	8.08588e-07	7.89123	Up-Regulated
DNMT3B	1.36796	5.11072	5.57235	3.81736e-08	8.37316e-07	7.85217	Up-Regulated
DDX27	1.00917	7.69107	5.56245	4.02894e-08	8.82118e-07	7.80001	Up-Regulated
SEC24C	1.05052	7.21352	5.55728	4.14403e-08	9.0567e-07	7.77278	Up-Regulated
MKI67	1.53931	5.1641	5.54948	4.32367e-08	9.43219e-07	7.73176	Up-Regulated
GINS2	1.80215	6.12779	5.54569	4.41366e-08	9.59374e-07	7.71185	Up-Regulated
PLK1	1.33542	4.8382	5.54186	4.50651e-08	9.7428e-07	7.69172	Up-Regulated
SAE2	1.18942	9.09383	5.53751	4.61415e-08	9.93982e-07	7.66891	Up-Regulated
TRIB3	1.87365	5.60198	5.52739	4.87442e-08	1.04444e-06	7.61587	Up-Regulated
RFC2	1.33152	6.04637	5.52556	4.92307e-08	1.05299e-06	7.60627	Up-Regulated
GTSE1	1.09811	4.90157	5.51786	5.13243e-08	1.09583e-06	7.56602	Up-Regulated
BLM	1.47694	5.08777	5.51543	5.2005e-08	1.10449e-06	7.55329	Up-Regulated
E2F8	1.66464	5.35851	5.49755	5.72788e-08	1.20797e-06	7.45996	Up-Regulated
C8orf30A	1.35214	6.06707	5.49649	5.76042e-08	1.21149e-06	7.45449	Up-Regulated
PPP4C	1.15185	7.22765	5.49588	5.77959e-08	1.2125e-06	7.45128	Up-Regulated
MRS2L	1.32163	6.02816	5.49418	5.83263e-08	1.22036e-06	7.44245	Up-Regulated
ERCC6L	1.2029	4.73318	5.49276	5.87752e-08	1.22305e-06	7.43504	Up-Regulated
ANP32E	1.42771	7.075	5.48759	6.04374e-08	1.25265e-06	7.4081	Up-Regulated
MRPL15	1.22352	9.41716	5.47999	6.29577e-08	1.3007e-06	7.36863	Up-Regulated
SHCBP1	1.40241	5.37306	5.45873	7.05726e-08	1.4365e-06	7.25835	Up-Regulated
POLR2H	1.03824	8.18837	5.45153	7.33497e-08	1.48951e-06	7.22107	Up-Regulated
DHCR7	1.26958	5.75519	5.4498	7.40322e-08	1.50084e-06	7.21213	Up-Regulated
RAD54L	1.18112	4.7854	5.44713	7.50996e-08	1.51991e-06	7.19831	Up-Regulated
POLR2K	1.23257	7.62111	5.43271	8.11149e-08	1.63342e-06	7.12391	Up-Regulated
ZNF652	1.88223	6.31857	5.42858	8.29264e-08	1.66711e-06	7.10258	Up-Regulated
PNO1	1.18198	7.01194	5.4183	8.75989e-08	1.74358e-06	7.04966	Up-Regulated
PUS7	1.24558	6.82369	5.41145	9.08517e-08	1.7994e-06	7.01447	Up-Regulated
SFXN1	1.04305	5.55259	5.40006	9.65251e-08	1.90238e-06	6.956	Up-Regulated
HSPA9	1.16872	8.25295	5.39766	9.77589e-08	1.92355e-06	6.94374	Up-Regulated
C12orf48	1.08199	5.14116	5.39533	9.89788e-08	1.94136e-06	6.93177	Up-Regulated
PPIB	1.27153	9.72803	5.39503	9.91368e-08	1.94136e-06	6.93023	Up-Regulated
SAC3D1	1.22408	6.56363	5.37278	1.11543e-07	2.15602e-06	6.81645	Up-Regulated
HSPC111	1.23355	6.55995	5.37055	1.12865e-07	2.17808e-06	6.80508	Up-Regulated
TFB2M	1.30928	7.46394	5.36491	1.16283e-07	2.24045e-06	6.77629	Up-Regulated
ZDHHC13	1.48234	6.857	5.35969	1.19529e-07	2.29565e-06	6.74973	Up-Regulated
THOC6	1.12876	5.02994	5.35341	1.2356e-07	2.359e-06	6.71774	Up-Regulated
CDK2	1.10641	5.26679	5.35275	1.23991e-07	2.3625e-06	6.71437	Up-Regulated
CNIH4	1.32744	7.99399	5.34608	1.28425e-07	2.44312e-06	6.68048	Up-Regulated
RPL39L	1.77349	6.78188	5.34184	1.31323e-07	2.49431e-06	6.65896	Up-Regulated
ZNF217	1.29382	7.84096	5.33828	1.33809e-07	2.53752e-06	6.64087	Up-Regulated
ZNF131	1.03246	6.17983	5.33354	1.37182e-07	2.5974e-06	6.61686	Up-Regulated
GTF2IRD1	1.17941	7.39777	5.31504	1.51176e-07	2.84447e-06	6.52318	Up-Regulated
TTC13	1.33883	5.94831	5.31041	1.54885e-07	2.90972e-06	6.4998	Up-Regulated
DR1	1.09377	6.59816	5.30032	1.63284e-07	3.06272e-06	6.44889	Up-Regulated
SCRIB	1.55314	7.11573	5.28653	1.75478e-07	3.27106e-06	6.37946	Up-Regulated
GMFB	1.22539	7.46782	5.28005	1.81512e-07	3.36273e-06	6.34687	Up-Regulated
MYO10	1.67033	6.59575	5.27569	1.85683e-07	3.42944e-06	6.32497	Up-Regulated
CENPN	1.17334	4.5884	5.27079	1.90486e-07	3.50739e-06	6.30036	Up-Regulated
FEN1	1.2668	6.2703	5.26478	1.96534e-07	3.61323e-06	6.27024	Up-Regulated
NCAPG2	1.36123	6.21643	5.24328	2.19729e-07	3.97294e-06	6.16274	Up-Regulated
PCBP4	1.16661	5.32926	5.23414	2.30379e-07	4.14063e-06	6.11714	Up-Regulated
ProSAPiP1	1.52929	7.55018	5.23129	2.33804e-07	4.18968e-06	6.10292	Up-Regulated
RNASEH2A	1.68958	7.08005	5.22916	2.36391e-07	4.22975e-06	6.09232	Up-Regulated
ZNF107	1.32187	5.04259	5.21311	2.56818e-07	4.58164e-06	6.01249	Up-Regulated
FASTKD1	1.04278	7.67369	5.19876	2.76514e-07	4.90395e-06	5.94133	Up-Regulated
ILVBL	1.45759	6.46505	5.19765	2.78104e-07	4.92489e-06	5.93581	Up-Regulated
CCDC59	1.05713	7.44167	5.194	2.83371e-07	5.01079e-06	5.91774	Up-Regulated
CHODL	2.34096	6.10835	5.19201	2.86281e-07	5.0508e-06	5.9079	Up-Regulated
PSME4	1.12349	6.34015	5.16847	3.23008e-07	5.65739e-06	5.79169	Up-Regulated
ATP13A3	1.01847	6.03966	5.14058	3.72465e-07	6.43503e-06	5.65458	Up-Regulated
F2R	1.74003	5.17965	5.13233	3.88437e-07	6.67269e-06	5.61418	Up-Regulated
RUSC1	1.1536	7.41155	5.12634	4.00452e-07	6.84978e-06	5.58486	Up-Regulated
PYROXD1	1.28783	6.82216	5.12085	4.11775e-07	7.00493e-06	5.55804	Up-Regulated
NOL1	1.19081	6.92841	5.11354	4.27333e-07	7.24195e-06	5.52236	Up-Regulated
C10orf18	1.04932	7.87889	5.11061	4.33729e-07	7.31508e-06	5.50807	Up-Regulated
C12orf41	1.00458	7.53464	5.09811	4.62083e-07	7.76068e-06	5.44716	Up-Regulated
UBE2V2	1.11812	7.75208	5.09282	4.74608e-07	7.92681e-06	5.42144	Up-Regulated
LYPLA1	1.22273	8.87727	5.08874	4.84507e-07	8.06976e-06	5.40159	Up-Regulated
CDC23	1.06579	7.0647	5.08027	5.05669e-07	8.36438e-06	5.36048	Up-Regulated
C11orf73	1.52387	6.01213	5.07602	5.16616e-07	8.53373e-06	5.33989	Up-Regulated
TDG	1.27152	7.35371	5.07489	5.19562e-07	8.55891e-06	5.33442	Up-Regulated
DONSON	1.54519	5.62859	5.06876	5.35846e-07	8.8151e-06	5.30475	Up-Regulated
NUP155	1.41554	6.18003	5.06755	5.39133e-07	8.85591e-06	5.29887	Up-Regulated
FBXO5	1.42999	5.4146	5.0673	5.39798e-07	8.85591e-06	5.29769	Up-Regulated
DARS2	1.08455	5.51642	5.04564	6.01868e-07	9.77515e-06	5.19306	Up-Regulated
EIF4EBP1	1.46484	6.84338	5.03776	6.2612e-07	1.01101e-05	5.15509	Up-Regulated
ZNF250	1.16321	5.39079	5.03261	6.42464e-07	1.03568e-05	5.13033	Up-Regulated
HLTF	1.19632	8.21827	5.02527	6.6648e-07	1.07296e-05	5.09506	Up-Regulated
CIT	1.23071	5.18878	5.0179	6.91467e-07	1.10727e-05	5.0597	Up-Regulated
ZNF623	1.34502	6.02928	5.0042	7.40338e-07	1.17614e-05	4.9941	Up-Regulated
LAGE3	1.00464	6.21331	4.99817	7.62895e-07	1.20879e-05	4.96527	Up-Regulated
MAP4K3	1.20045	6.4316	4.99241	7.85066e-07	1.23579e-05	4.93775	Up-Regulated
MYBL2	1.4442	5.13544	4.98426	8.17503e-07	1.28182e-05	4.89887	Up-Regulated
C19orf62	1.20541	7.4572	4.98061	8.32447e-07	1.30355e-05	4.88147	Up-Regulated
GNL2	1.2567	7.92164	4.97869	8.40403e-07	1.3143e-05	4.87234	Up-Regulated
SLC2A4RG	1.11512	6.6508	4.97802	8.43195e-07	1.31696e-05	4.86915	Up-Regulated
MTERFD1	1.15988	7.6312	4.97495	8.5614e-07	1.33545e-05	4.85452	Up-Regulated
RAD1	1.12871	6.68545	4.9728	8.653e-07	1.34799e-05	4.8443	Up-Regulated
TMEM118	1.19164	5.16718	4.9708	8.73916e-07	1.3579e-05	4.83479	Up-Regulated
ADSS	1.08141	7.29246	4.97008	8.7701e-07	1.3592e-05	4.8314	Up-Regulated
CDKN2A	2.00993	6.12713	4.95922	9.2545e-07	1.42328e-05	4.77978	Up-Regulated
UNG	1.10208	7.54055	4.95605	9.40035e-07	1.44203e-05	4.76477	Up-Regulated
FAM82B	1.37825	6.4839	4.95091	9.64192e-07	1.47532e-05	4.74041	Up-Regulated
FANCG	1.35036	6.39109	4.94072	1.01386e-06	1.54152e-05	4.6922	Up-Regulated
PCCB	1.29118	7.52723	4.93458	1.04496e-06	1.58579e-05	4.6632	Up-Regulated
C2orf49	1.03144	5.89449	4.93192	1.05874e-06	1.60167e-05	4.65063	Up-Regulated
ISG15	2.57508	9.14671	4.91392	1.15658e-06	1.7366e-05	4.56582	Up-Regulated
HMGB3	1.21629	6.82699	4.89549	1.26577e-06	1.88644e-05	4.47928	Up-Regulated
GOLT1B	1.60669	5.92282	4.89513	1.26801e-06	1.88744e-05	4.47758	Up-Regulated
ZNF281	1.04896	5.67477	4.88724	1.31783e-06	1.94954e-05	4.44062	Up-Regulated
LASS6	1.11324	7.88311	4.88165	1.35426e-06	1.98879e-05	4.41447	Up-Regulated
TBCE	1.20132	6.31681	4.87538	1.39627e-06	2.04052e-05	4.38518	Up-Regulated
SLC29A2	1.03436	4.75788	4.85138	1.56902e-06	2.26548e-05	4.27335	Up-Regulated
C1orf109	1.20129	6.13086	4.84912	1.58631e-06	2.28496e-05	4.26284	Up-Regulated
HISPPD1	1.16224	5.65743	4.81966	1.82921e-06	2.61297e-05	4.12631	Up-Regulated
ARL4C	1.59341	6.78752	4.80516	1.96147e-06	2.77882e-05	4.05943	Up-Regulated
SMARCC1	1.04089	6.88426	4.80197	1.99182e-06	2.81521e-05	4.04472	Up-Regulated
POLE2	1.50665	5.45017	4.79988	2.01191e-06	2.83661e-05	4.03511	Up-Regulated
SFMBT1	1.12935	5.48376	4.78559	2.15476e-06	3.01366e-05	3.96941	Up-Regulated
PPAT	1.02535	5.85481	4.78428	2.16839e-06	3.02921e-05	3.96337	Up-Regulated
STAM	1.11858	6.64699	4.78239	2.18803e-06	3.03901e-05	3.95474	Up-Regulated
WHSC1	1.14801	5.39205	4.76907	2.33208e-06	3.21683e-05	3.89369	Up-Regulated
CORO1C	1.26197	7.26945	4.76622	2.36408e-06	3.25724e-05	3.88064	Up-Regulated
MRPS15	1.34874	7.4583	4.76424	2.38654e-06	3.28068e-05	3.87159	Up-Regulated
ZNF146	1.08951	7.93693	4.76232	2.40855e-06	3.30339e-05	3.8628	Up-Regulated
LSM5	1.16309	7.18714	4.75579	2.48473e-06	3.38474e-05	3.833	Up-Regulated
YRDC	1.09205	6.5975	4.75167	2.53393e-06	3.44398e-05	3.81423	Up-Regulated
S100A2	3.05674	7.59827	4.74149	2.65976e-06	3.59067e-05	3.76785	Up-Regulated
EIF4G1	1.03835	7.46261	4.73889	2.69288e-06	3.63132e-05	3.756	Up-Regulated
MRPL13	1.45703	7.57797	4.73734	2.71279e-06	3.64592e-05	3.74896	Up-Regulated
SMS	1.28252	7.59814	4.72972	2.81276e-06	3.7593e-05	3.71433	Up-Regulated
CSGlcA-T	1.06224	6.01613	4.7238	2.89293e-06	3.84936e-05	3.68744	Up-Regulated
GPSM2	1.16047	5.64648	4.71724	2.98419e-06	3.95767e-05	3.65773	Up-Regulated
KNTC1	1.32593	5.28442	4.71534	3.01111e-06	3.98021e-05	3.64914	Up-Regulated
CDC25B	1.44663	6.88567	4.71348	3.03785e-06	4.00677e-05	3.64068	Up-Regulated
POLD1	1.03478	4.95927	4.71078	3.07686e-06	4.04935e-05	3.62847	Up-Regulated
COPG	1.21179	7.80063	4.70757	3.12388e-06	4.10227e-05	3.61397	Up-Regulated
PRSS8	1.55734	6.21786	4.70534	3.15707e-06	4.14133e-05	3.60386	Up-Regulated
ING4	1.09867	6.011	4.7003	3.23311e-06	4.22727e-05	3.5811	Up-Regulated
HMBS	1.07728	6.30107	4.68342	3.5008e-06	4.51355e-05	3.50503	Up-Regulated
C5orf22	1.08306	6.94187	4.68194	3.52534e-06	4.54033e-05	3.49835	Up-Regulated
ZNF93	1.12934	6.00876	4.66377	3.83932e-06	4.92365e-05	3.41679	Up-Regulated
CHKA	1.09525	5.36016	4.66278	3.85727e-06	4.93616e-05	3.41234	Up-Regulated
MX2	2.01458	7.02825	4.6318	4.45832e-06	5.60993e-05	3.27396	Up-Regulated
RAE1	1.0262	8.03755	4.62352	4.63377e-06	5.8004e-05	3.23709	Up-Regulated
PARP6	1.01449	7.11708	4.62133	4.68125e-06	5.84988e-05	3.22735	Up-Regulated
USP18	1.64356	5.65924	4.61505	4.81983e-06	6.00211e-05	3.19949	Up-Regulated
TARBP2	1.01882	6.54246	4.60773	4.98656e-06	6.17779e-05	3.16701	Up-Regulated
PMS2	1.04823	6.02371	4.5889	5.4412e-06	6.6724e-05	3.08371	Up-Regulated
UPF3B	1.20545	6.5907	4.58679	5.49443e-06	6.73081e-05	3.07441	Up-Regulated
NEU1	1.54732	7.01058	4.57771	5.72987e-06	6.96258e-05	3.03436	Up-Regulated
CLPB	1.00732	5.09343	4.57145	5.89759e-06	7.15194e-05	3.00683	Up-Regulated
CKS1B	1.35011	9.4229	4.56313	6.12823e-06	7.3944e-05	2.97022	Up-Regulated
PDCD10	1.08908	9.13463	4.56025	6.20993e-06	7.47052e-05	2.95758	Up-Regulated
UBXD7	1.15961	6.37683	4.55366	6.40093e-06	7.66203e-05	2.92868	Up-Regulated
ZNF136	1.3128	5.86061	4.54948	6.52502e-06	7.80281e-05	2.91036	Up-Regulated
NUP85	1.13584	6.90783	4.54744	6.58623e-06	7.86819e-05	2.90146	Up-Regulated
STIP1	1.20749	6.75126	4.53914	6.84195e-06	8.1575e-05	2.86512	Up-Regulated
MT1X	1.87757	8.01646	4.53594	6.94276e-06	8.26133e-05	2.85117	Up-Regulated
SPC25	1.49261	4.95145	4.53265	7.04825e-06	8.37858e-05	2.83679	Up-Regulated
FAM3C	1.13441	8.83802	4.52781	7.20592e-06	8.54913e-05	2.81569	Up-Regulated
INTS7	1.11269	5.53951	4.50586	7.96517e-06	9.30325e-05	2.72018	Up-Regulated
PDCD5	1.21843	6.95768	4.48321	8.82872e-06	0.000101973	2.62208	Up-Regulated
MAN2B1	1.10479	6.74292	4.48312	8.8322e-06	0.000101973	2.6217	Up-Regulated
TUFT1	1.20194	6.79547	4.48279	8.84561e-06	0.00010203	2.62026	Up-Regulated
C12orf44	1.0345	7.62294	4.46427	9.61862e-06	0.000109478	2.54044	Up-Regulated
DCK	1.14401	6.45805	4.43371	1.10384e-05	0.000124461	2.40933	Up-Regulated
KIAA0406	1.10232	6.33804	4.4271	1.13706e-05	0.00012761	2.3811	Up-Regulated
FLJ10292	1.13552	6.13548	4.41899	1.17918e-05	0.000130872	2.34649	Up-Regulated
C1orf108	1.26068	7.42148	4.41647	1.19255e-05	0.000132235	2.33576	Up-Regulated
PHF16	1.11527	5.712	4.4128	1.2123e-05	0.000134301	2.32012	Up-Regulated
ZNF512B	1.06762	5.95491	4.40124	1.27655e-05	0.000140771	2.27099	Up-Regulated
SLC38A1	1.27315	8.84363	4.39883	1.29037e-05	0.000142035	2.26074	Up-Regulated
CSNK2A1	1.05814	6.76621	4.39303	1.32415e-05	0.000145091	2.23615	Up-Regulated
FABP5	1.56939	7.44774	4.38855	1.35086e-05	0.000147614	2.21716	Up-Regulated
RSF1	1.26099	5.74808	4.38705	1.35988e-05	0.000148213	2.21083	Up-Regulated
C1orf106	1.51616	7.23228	4.37603	1.42816e-05	0.000154103	2.16423	Up-Regulated
CXCL10	3.09807	7.8961	4.37579	1.42969e-05	0.000154131	2.16321	Up-Regulated
HSPA14	1.20385	7.26692	4.3749	1.43537e-05	0.000154604	2.15945	Up-Regulated
ZNF184	1.32889	5.57215	4.36995	1.46724e-05	0.000157473	2.13856	Up-Regulated
HIG2	1.40416	7.52868	4.3695	1.47019e-05	0.00015765	2.13665	Up-Regulated
TSNAX	1.04901	7.71693	4.36681	1.48784e-05	0.000158976	2.12531	Up-Regulated
CEP170	1.08966	6.31663	4.36559	1.4959e-05	0.000159554	2.12017	Up-Regulated
PAFAH1B3	1.21126	7.07848	4.36535	1.49745e-05	0.000159577	2.11919	Up-Regulated
MGC72080	1.3015	7.12344	4.35741	1.55104e-05	0.00016456	2.08576	Up-Regulated
TIMP2	1.2017	6.48667	4.35111	1.59488e-05	0.000168619	2.05927	Up-Regulated
OPLAH	1.33452	4.77391	4.3488	1.61127e-05	0.000170052	2.04954	Up-Regulated
KLHL23	1.30011	6.08617	4.3453	1.63638e-05	0.000172249	2.03485	Up-Regulated
RPAP3	1.14287	6.17762	4.33119	1.74134e-05	0.000182659	1.97577	Up-Regulated
CCDC99	1.157	5.84541	4.32956	1.75395e-05	0.000183778	1.96892	Up-Regulated
KIF18A	1.05508	4.38408	4.32129	1.8189e-05	0.000188984	1.93437	Up-Regulated
SLC25A32	1.04043	6.80098	4.31827	1.84312e-05	0.000191005	1.92181	Up-Regulated
SERPINH1	1.18974	7.74764	4.31723	1.85158e-05	0.000191553	1.91745	Up-Regulated
MAL	3.18982	7.42237	4.31592	1.86231e-05	0.000192498	1.91196	Up-Regulated
KLK5	2.95105	6.39145	4.30603	1.94483e-05	0.000199728	1.87079	Up-Regulated
PRKDC	1.09314	6.80221	4.30294	1.97133e-05	0.000201517	1.85793	Up-Regulated
MARCKSL1	1.18576	9.24067	4.29896	2.00597e-05	0.000204537	1.8414	Up-Regulated
CALU	1.01396	6.95865	4.2978	2.01617e-05	0.00020523	1.83658	Up-Regulated
LGMN	1.23396	7.61859	4.29375	2.0522e-05	0.000208194	1.81976	Up-Regulated
LSM8	1.07808	7.30777	4.2924	2.06434e-05	0.000208889	1.81416	Up-Regulated
TMPRSS4	2.30927	6.53552	4.29214	2.0666e-05	0.000208889	1.81312	Up-Regulated
C13orf34	1.18446	5.17517	4.29193	2.06853e-05	0.000208889	1.81223	Up-Regulated
PFDN6	1.00439	6.01334	4.29183	2.06946e-05	0.000208889	1.81181	Up-Regulated
C1orf63	1.39852	6.77372	4.28844	2.10028e-05	0.000211468	1.79778	Up-Regulated
GPR19	1.2418	4.72639	4.27835	2.19482e-05	0.000220067	1.75598	Up-Regulated
TMEM132A	1.02847	4.98665	4.26847	2.29126e-05	0.000227363	1.71517	Up-Regulated
FASTKD3	1.08196	6.32773	4.24139	2.57673e-05	0.000251247	1.60377	Up-Regulated
KRAS	1.19529	8.26538	4.23278	2.67432e-05	0.00026013	1.56852	Up-Regulated
TMEM30A	1.20631	7.60252	4.22906	2.71762e-05	0.000263491	1.55329	Up-Regulated
SMU1	1.02771	5.28954	4.22786	2.7317e-05	0.00026443	1.54839	Up-Regulated
GPI	1.00276	9.37302	4.22522	2.76304e-05	0.000267249	1.53758	Up-Regulated
OGDHL	1.21856	5.27831	4.22433	2.77369e-05	0.000268064	1.53393	Up-Regulated
RBM35A	1.32485	8.02478	4.22313	2.78799e-05	0.000268584	1.52905	Up-Regulated
MXRA5	1.89766	8.42288	4.21449	2.89367e-05	0.000277213	1.49378	Up-Regulated
CHUK	1.02372	5.1309	4.20817	2.97332e-05	0.00028439	1.46805	Up-Regulated
DGAT1	1.20964	5.61949	4.2064	2.99601e-05	0.000286106	1.46084	Up-Regulated
SLC39A4	1.55584	7.55643	4.20401	3.02697e-05	0.000287976	1.4511	Up-Regulated
CLPX	1.05686	6.14231	4.19951	3.086e-05	0.000291922	1.4328	Up-Regulated
PIK3CA	1.12837	6.05544	4.19599	3.13286e-05	0.000295426	1.41852	Up-Regulated
APOBEC3B	2.04004	5.55698	4.18924	3.22471e-05	0.00030243	1.39114	Up-Regulated
KIF4A	1.34708	5.94994	4.18631	3.26539e-05	0.000305768	1.37926	Up-Regulated
FMR1	1.02366	8.08153	4.1834	3.30627e-05	0.000309245	1.36748	Up-Regulated
ACN9	1.19347	6.3624	4.1833	3.30765e-05	0.000309245	1.36708	Up-Regulated
C6orf66	1.17082	6.66445	4.18196	3.32665e-05	0.000310298	1.36166	Up-Regulated
CTSA	1.05896	8.34352	4.17007	3.49992e-05	0.000325201	1.31357	Up-Regulated
TMEFF1	1.59038	4.9965	4.16048	3.64576e-05	0.000336416	1.27491	Up-Regulated
TEX10	1.00201	7.02345	4.15483	3.73433e-05	0.000343274	1.25219	Up-Regulated
RP4-691N24.1	1.11845	5.35177	4.15373	3.75193e-05	0.000343842	1.24774	Up-Regulated
MCM10	1.38017	4.45984	4.1518	3.78274e-05	0.000346397	1.24	Up-Regulated
CXorf34	1.17312	5.14737	4.14919	3.82489e-05	0.000349199	1.22951	Up-Regulated
HSPBAP1	1.07716	6.07445	4.14359	3.91686e-05	0.000355976	1.20702	Up-Regulated
RFC5	1.10052	5.60198	4.13706	4.02663e-05	0.000364577	1.18086	Up-Regulated
ABHD11	1.16082	7.96304	4.13565	4.05073e-05	0.000366483	1.17521	Up-Regulated
CTPS2	1.03076	5.19475	4.13506	4.06099e-05	0.00036686	1.17282	Up-Regulated
TMEM45A	1.91762	6.36701	4.11809	4.36276e-05	0.00039177	1.10501	Up-Regulated
ZNF430	1.03378	5.78559	4.11644	4.39321e-05	0.000393623	1.09843	Up-Regulated
CRABP2	1.67816	8.83398	4.11462	4.42711e-05	0.000395777	1.09116	Up-Regulated
YAP1	1.05794	6.75977	4.10828	4.54684e-05	0.0004044	1.06592	Up-Regulated
TRIP13	1.32326	6.95576	4.10601	4.59052e-05	0.000407963	1.05688	Up-Regulated
STAT1	1.29885	6.83612	4.09951	4.71765e-05	0.00041772	1.03105	Up-Regulated
GBP1	1.73508	8.16384	4.09416	4.82474e-05	0.000426262	1.00983	Up-Regulated
CHEK2	1.08423	5.25627	4.08807	4.94961e-05	0.00043411	0.985671	Up-Regulated
DNM1L	1.06383	7.44881	4.06906	5.35928e-05	0.000465631	0.910521	Up-Regulated
TARBP1	1.10967	6.47412	4.06882	5.36467e-05	0.000465764	0.909571	Up-Regulated
GCA	1.05593	6.37172	4.05652	5.64674e-05	0.000486127	0.861163	Up-Regulated
GINS4	1.24205	4.8001	4.05649	5.64766e-05	0.000486127	0.861009	Up-Regulated
ZNF43	1.04785	6.10175	4.05344	5.71978e-05	0.000491281	0.849024	Up-Regulated
C5orf28	1.00046	6.20261	4.05011	5.79949e-05	0.000495523	0.835952	Up-Regulated
SLC12A8	1.29746	6.11885	4.0479	5.85296e-05	0.000498369	0.827286	Up-Regulated
SPP1	1.57395	10.2714	4.04777	5.8561e-05	0.000498369	0.826778	Up-Regulated
RND3	1.33256	8.47511	4.0466	5.88465e-05	0.000499387	0.822186	Up-Regulated
PTBP2	1.48051	5.7398	4.03128	6.27068e-05	0.000528423	0.762196	Up-Regulated
SHMT2	1.06065	7.10483	4.03039	6.29383e-05	0.000530002	0.758718	Up-Regulated
MSL2L1	1.00954	6.52477	4.00674	6.93988e-05	0.000576743	0.666503	Up-Regulated
IFI6	2.09692	9.34707	4.00379	7.02454e-05	0.000582782	0.655064	Up-Regulated
ZNF7	1.10343	6.11548	3.99385	7.31784e-05	0.000601923	0.61648	Up-Regulated
RFC3	1.15136	6.46273	3.99132	7.39433e-05	0.000606144	0.606673	Up-Regulated
EPHB3	1.33287	4.99671	3.96663	8.18104e-05	0.000659456	0.511351	Up-Regulated
HIST1H2BH	1.20007	5.07593	3.94424	8.96251e-05	0.00071051	0.425389	Up-Regulated
SYT11	1.28402	5.1826	3.90499	0.000105058	0.000813573	0.275805	Up-Regulated
MYBL1	1.08535	4.61281	3.88466	0.000114009	0.000870755	0.198877	Up-Regulated
PLOD2	1.50544	7.5622	3.88327	0.000114649	0.000873796	0.193618	Up-Regulated
YPEL1	1.00743	5.07255	3.87241	0.000119746	0.000905196	0.152712	Up-Regulated
SUSD4	1.51244	5.7842	3.87101	0.00012042	0.000909151	0.147434	Up-Regulated
STC2	1.04006	4.87113	3.86463	0.000123532	0.000926834	0.123448	Up-Regulated
SLC25A13	1.02765	6.86535	3.86184	0.000124916	0.000936638	0.112971	Up-Regulated
UBFD1	1.00057	6.22952	3.85706	0.000127319	0.000950515	0.0950595	Up-Regulated
LY6E	1.54073	7.91007	3.85494	0.000128402	0.000956821	0.0870987	Up-Regulated
ZNF195	1.03577	6.26059	3.83986	0.000136346	0.00100359	0.0306965	Up-Regulated
YEATS4	1.06137	5.86381	3.83629	0.000138291	0.00101419	0.0173928	Up-Regulated
DDIT3	1.01676	5.89023	3.8238	0.000145316	0.00105926	-0.0291423	Up-Regulated
C8orf32	1.13473	6.76791	3.81956	0.000147773	0.00107263	-0.0448913	Up-Regulated
EBP	1.01402	6.4832	3.80878	0.000154203	0.00111392	-0.0848706	Up-Regulated
C8orf55	1.16113	5.44529	3.80638	0.00015567	0.00112317	-0.0937593	Up-Regulated
AYTL2	1.08488	6.80928	3.80176	0.000158533	0.00114042	-0.110864	Up-Regulated
SLC43A3	1.1694	5.63375	3.79467	0.000163023	0.00116714	-0.137072	Up-Regulated
COL1A1	1.76153	7.29063	3.79451	0.000163123	0.00116716	-0.137644	Up-Regulated
TNNI3	1.13017	4.74485	3.77554	0.000175732	0.00124334	-0.207485	Up-Regulated
CSAD	1.34055	5.69888	3.76826	0.000180814	0.00127257	-0.234218	Up-Regulated
C4orf30	1.20375	6.33379	3.76397	0.000183869	0.00129105	-0.249927	Up-Regulated
LAMP3	2.06048	6.27567	3.75954	0.000187084	0.00130752	-0.266172	Up-Regulated
BBS10	1.03599	5.73133	3.75272	0.000192124	0.001336	-0.291088	Up-Regulated
MSH2	1.07955	6.74327	3.74557	0.000197547	0.00136655	-0.317171	Up-Regulated
LACTB2	1.32498	6.54952	3.74302	0.000199521	0.00137608	-0.326489	Up-Regulated
ESF1	1.01168	7.16462	3.71812	0.000219742	0.00149499	-0.416898	Up-Regulated
KIF1A	2.00045	5.66084	3.71676	0.000220904	0.0015012	-0.421835	Up-Regulated
KIF5C	1.48986	5.45543	3.70922	0.000227429	0.00154033	-0.449087	Up-Regulated
COL5A2	2.35788	7.05626	3.70035	0.000235343	0.00158412	-0.481095	Up-Regulated
MCM3	1.00232	7.1644	3.69916	0.000236418	0.00158781	-0.485361	Up-Regulated
CTPS	1.17742	6.26953	3.68846	0.000246353	0.00164171	-0.523871	Up-Regulated
EIF2C3	1.02856	5.92469	3.68171	0.000252813	0.00167734	-0.548083	Up-Regulated
IGFBP2	1.70596	8.59767	3.65417	0.000280884	0.00183129	-0.646508	Up-Regulated
HRASLS	1.15344	4.68415	3.64926	0.00028619	0.00185485	-0.663996	Up-Regulated
PXDN	1.60961	7.73606	3.64603	0.000289726	0.00187072	-0.675469	Up-Regulated
CEBPG	1.19275	6.27646	3.64163	0.000294614	0.00189395	-0.691097	Up-Regulated
B3GALNT1	1.14907	5.31005	3.63978	0.000296695	0.00190448	-0.69767	Up-Regulated
CTSL2	1.51072	5.89821	3.62302	0.000316147	0.00200371	-0.756966	Up-Regulated
SPATS2	1.01722	5.74366	3.61092	0.000330942	0.00208322	-0.799653	Up-Regulated
MED28	1.09395	7.29726	3.59861	0.000346646	0.00216848	-0.842909	Up-Regulated
LTBP2	1.1983	7.65924	3.59722	0.000348464	0.00217645	-0.847786	Up-Regulated
OAS3	1.62707	6.34872	3.59303	0.000354	0.00220417	-0.862487	Up-Regulated
ZNF124	1.10395	5.52906	3.59048	0.000357396	0.00222302	-0.871393	Up-Regulated
CBS	1.42736	6.26467	3.57932	0.000372674	0.00230495	-0.91042	Up-Regulated
GLDC	2.10142	6.66005	3.56576	0.000392062	0.00240633	-0.95769	Up-Regulated
MYCL1	1.184	5.41119	3.54828	0.000418439	0.00253443	-1.01834	Up-Regulated
SNX10	1.25251	6.31408	3.54803	0.000418827	0.00253443	-1.01921	Up-Regulated
NT5DC2	1.09769	6.39961	3.53079	0.000446489	0.0026816	-1.07875	Up-Regulated
UCHL1	2.32005	7.25472	3.52485	0.000456402	0.00272437	-1.09919	Up-Regulated
NFE2L3	1.04619	4.95763	3.52476	0.00045655	0.00272437	-1.09949	Up-Regulated
IFI44	1.76541	6.94382	3.52269	0.000460055	0.00274121	-1.1066	Up-Regulated
MCM3APAS	1.02662	4.64721	3.5168	0.000470174	0.00279321	-1.12685	Up-Regulated
PHACTR4	1.16758	6.3294	3.50406	0.000492774	0.00290597	-1.17051	Up-Regulated
PRMT3	1.02729	6.25441	3.5037	0.000493429	0.0029084	-1.17175	Up-Regulated
PTH2R	2.31374	5.48755	3.50316	0.000494405	0.00291273	-1.17359	Up-Regulated
COL4A1	1.1706	7.44675	3.4756	0.000546958	0.00318033	-1.26747	Up-Regulated
IRF7	1.30843	6.38289	3.463	0.000572677	0.00330435	-1.31015	Up-Regulated
MT1G	2.22136	8.15256	3.45909	0.000580889	0.00334454	-1.32337	Up-Regulated
COL11A1	2.93364	5.95225	3.45048	0.000599357	0.00343198	-1.35242	Up-Regulated
IFI44L	1.9403	7.11351	3.44953	0.000601437	0.00343898	-1.35564	Up-Regulated
IDH2	1.01505	8.03558	3.44687	0.00060726	0.0034657	-1.36458	Up-Regulated
FZD2	1.47851	5.3595	3.44056	0.000621316	0.00353921	-1.38582	Up-Regulated
C1orf38	1.38568	5.58521	3.43292	0.000638743	0.00361851	-1.41148	Up-Regulated
PGD	1.05645	6.89011	3.43108	0.000642996	0.00363348	-1.41763	Up-Regulated
LOC440295	1.14994	6.50908	3.42557	0.000655925	0.00369268	-1.4361	Up-Regulated
ITGB8	1.1116	4.65887	3.35937	0.000831332	0.00449928	-1.6556	Up-Regulated
OAS2	1.28518	5.40397	3.34516	0.000874281	0.00467915	-1.70218	Up-Regulated
OAS1	1.62986	6.36622	3.33308	0.000912406	0.00485086	-1.74164	Up-Regulated
MFAP2	1.90642	7.17402	3.32771	0.000929857	0.00491542	-1.75914	Up-Regulated
APOA1	2.20612	6.36928	3.3265	0.000933826	0.00492559	-1.76308	Up-Regulated
TUBA4A	1.22434	6.87435	3.32366	0.000943186	0.00496409	-1.77229	Up-Regulated
KLK7	1.92259	8.27919	3.322	0.000948725	0.00498671	-1.7777	Up-Regulated
POLE3	1.04624	7.71881	3.32137	0.000950826	0.00499121	-1.77974	Up-Regulated
C8orf33	1.0284	7.45442	3.31089	0.000986485	0.00514922	-1.81375	Up-Regulated
RYR1	1.06669	4.8529	3.2953	0.00104181	0.0053982	-1.86411	Up-Regulated
MMP9	1.75598	6.00963	3.29377	0.00104741	0.0054179	-1.86906	Up-Regulated
OSBPL10	1.14494	7.20797	3.2841	0.00108334	0.00558217	-1.90017	Up-Regulated
PTPRG	1.11813	5.38487	3.28355	0.0010854	0.00559044	-1.90193	Up-Regulated
RIT1	1.01621	5.33978	3.2699	0.00113819	0.00580766	-1.94572	Up-Regulated
MYO1B	1.04552	5.70926	3.24712	0.00123156	0.00620523	-2.01837	Up-Regulated
CHST2	1.33966	5.74759	3.23711	0.00127481	0.00635929	-2.05015	Up-Regulated
PVRL3	1.48304	6.35485	3.22013	0.00135138	0.00668036	-2.10383	Up-Regulated
PHYH	1.04356	7.3929	3.20229	0.0014364	0.00703421	-2.15993	Up-Regulated
EGFL6	1.58751	7.55802	3.19342	0.00148052	0.00721798	-2.18774	Up-Regulated
DSC2	1.35871	5.70339	3.18643	0.00151609	0.00735863	-2.20955	Up-Regulated
PRIM1	1.08985	6.40704	3.17081	0.00159857	0.00768155	-2.2582	Up-Regulated
OASL	1.13612	4.83743	3.13794	0.00178584	0.00836772	-2.35982	Up-Regulated
WDR57	1.00671	6.02697	3.13359	0.00181207	0.00847743	-2.37318	Up-Regulated
TNFAIP2	1.18288	6.49369	3.09622	0.0020526	0.00940542	-2.48731	Up-Regulated
FHL2	1.13511	8.07931	3.08049	0.00216233	0.00980376	-2.53494	Up-Regulated
SLC2A1	1.13012	8.2648	3.07839	0.00217735	0.00984591	-2.54127	Up-Regulated
APLP1	1.03213	5.1262	3.05947	0.00231737	0.0103278	-2.59822	Up-Regulated
PLEKHF2	1.07014	6.76797	3.05769	0.00233103	0.0103772	-2.60359	Up-Regulated
IFIT1	1.78271	8.24271	3.05371	0.00236167	0.0104595	-2.61551	Up-Regulated
LAMB1	1.2712	5.86868	3.04714	0.00241305	0.0106595	-2.63516	Up-Regulated
FADS1	1.09457	5.63854	3.0463	0.00241972	0.0106812	-2.63768	Up-Regulated
HIST1H3H	1.31605	4.80593	3.03861	0.00248135	0.0108973	-2.66063	Up-Regulated
CDR2L	1.13682	6.25702	3.02047	0.00263249	0.0114442	-2.71455	Up-Regulated
PRSS21	1.94606	6.25651	3.00507	0.00276734	0.0118888	-2.76008	Up-Regulated
PLAU	1.37074	5.39195	2.99155	0.00289094	0.0123057	-2.79987	Up-Regulated
COL9A2	1.29504	5.10658	2.9892	0.00291299	0.0123775	-2.80678	Up-Regulated
PSAT1	1.32605	6.7925	2.95103	0.00329225	0.0136897	-2.91807	Up-Regulated
COL10A1	1.75515	5.49603	2.94431	0.00336355	0.0139389	-2.93753	Up-Regulated
CRABP1	2.24332	5.66639	2.94361	0.00337101	0.0139593	-2.93954	Up-Regulated
TDO2	1.77777	5.38947	2.93285	0.00348831	0.0143611	-2.9706	Up-Regulated
C12orf5	1.01175	5.8492	2.93151	0.00350322	0.014393	-2.97447	Up-Regulated
ATHL1	1.06162	4.87813	2.92601	0.00356484	0.0145864	-2.99029	Up-Regulated
RP6-213H19.1	1.14415	5.96351	2.92241	0.00360565	0.0147106	-3.00061	Up-Regulated
NP	1.09732	6.45954	2.90155	0.00385102	0.0154838	-3.06029	Up-Regulated
BCAT1	1.77682	5.25738	2.89663	0.00391107	0.0156886	-3.07431	Up-Regulated
S100A14	1.01926	6.10867	2.89393	0.00394436	0.0157897	-3.08199	Up-Regulated
SPOCK2	1.05871	5.92969	2.89132	0.00397682	0.0158888	-3.08941	Up-Regulated
NETO2	1.14372	4.96749	2.87478	0.00418815	0.016567	-3.13627	Up-Regulated
CLIC5	1.21256	6.33563	2.86572	0.00430819	0.0169305	-3.16183	Up-Regulated
CP	1.65248	8.8361	2.85127	0.00450609	0.0175606	-3.20243	Up-Regulated
AADAC	1.11428	4.86852	2.83997	0.00466649	0.018063	-3.23402	Up-Regulated
LGR4	1.0941	6.8938	2.83717	0.00470706	0.0181908	-3.24183	Up-Regulated
TNFAIP6	1.16915	4.95646	2.82878	0.00483062	0.0185967	-3.26522	Up-Regulated
KIAA1199	1.24971	5.74248	2.82433	0.00489723	0.0187908	-3.27757	Up-Regulated
TM4SF1	1.02478	8.88023	2.77765	0.0056486	0.0209745	-3.40616	Up-Regulated
FOLR3	1.01536	4.74545	2.76645	0.00584367	0.0215593	-3.43669	Up-Regulated
VGLL1	1.14435	4.52252	2.75098	0.00612316	0.0224079	-3.47867	Up-Regulated
TRIB2	1.07958	6.0467	2.74477	0.00623869	0.0227518	-3.49546	Up-Regulated
HIST1H2BG	1.03564	4.72303	2.6985	0.00716362	0.0253868	-3.6194	Up-Regulated
CSTA	1.27915	6.26508	2.68114	0.00754134	0.0264838	-3.66537	Up-Regulated
CXCL11	1.51407	4.94972	2.67908	0.00758727	0.0266122	-3.6708	Up-Regulated
CXCL9	1.83488	5.94695	2.67233	0.00773975	0.0270465	-3.68858	Up-Regulated
PTX3	1.59733	6.05704	2.66501	0.00790819	0.0275073	-3.70782	Up-Regulated
TNC	1.34703	5.46091	2.65993	0.00802709	0.0278565	-3.72115	Up-Regulated
CDH6	1.09185	5.34361	2.65539	0.00813453	0.0281646	-3.73302	Up-Regulated
TMEM158	1.30752	5.33542	2.64753	0.0083239	0.0286799	-3.75355	Up-Regulated
GPRC5A	1.47063	6.21361	2.63208	0.0087074	0.029707	-3.79372	Up-Regulated
S100A1	1.24182	7.02439	2.61089	0.00925909	0.0311012	-3.84843	Up-Regulated
VCAN	1.53824	6.06688	2.59486	0.00969694	0.0323464	-3.88952	Up-Regulated
XAF1	1.18627	6.56446	2.59449	0.00970744	0.0323635	-3.89049	Up-Regulated
HIST1H4H	1.1018	4.55232	2.59285	0.00975334	0.0324806	-3.89468	Up-Regulated
GOLGA8A	1.11761	6.83629	2.58303	0.0100321	0.0332067	-3.91971	Up-Regulated
C2	1.08143	6.46708	2.56766	0.0104827	0.0343582	-3.95872	Up-Regulated
HIST1H2AE	1.09889	5.25649	2.56736	0.0104916	0.0343782	-3.95947	Up-Regulated
HERC5	1.27487	6.91213	2.55403	0.0108974	0.0354879	-3.99313	Up-Regulated
NTF3	1.01362	4.78588	2.53897	0.0113723	0.0366949	-4.03091	Up-Regulated
MLLT11	1.00787	6.1049	2.53027	0.0116552	0.0372782	-4.05266	Up-Regulated
CLDN16	1.59175	5.94615	2.52085	0.0119682	0.0380869	-4.07609	Up-Regulated
KRT5	1.2008	5.14843	2.49957	0.0127036	0.0398583	-4.12877	Up-Regulated
COL1A2	1.03888	10.7108	2.49639	0.0128169	0.0401199	-4.13661	Up-Regulated
BST2	1.23416	8.69385	2.49168	0.0129863	0.0405552	-4.1482	Up-Regulated
HTR3A	1.40507	4.66202	2.48596	0.0131946	0.0411204	-4.16223	Up-Regulated
DDX58	1.06167	6.00594	2.4714	0.0137381	0.0423974	-4.19781	Up-Regulated
TNNT1	1.35008	7.0881	2.46273	0.0140714	0.0431824	-4.21891	Up-Regulated
THY1	1.09192	6.71026	2.45322	0.0144452	0.0440825	-4.24198	Up-Regulated
SPAG4	1.0047	5.33414	2.45086	0.0145393	0.0442829	-4.24768	Up-Regulated
CXCL13	1.0166	4.90234	2.43977	0.0149886	0.0453158	-4.27444	Up-Regulated
RSAD2	1.28654	6.03738	2.42174	0.0157451	0.0471392	-4.31766	Up-Regulated
TWIST1	1.12729	4.90009	2.4154	0.0160193	0.0477369	-4.3328	Up-Regulated
CYBRD1	1.05114	5.65554	2.40811	0.0163397	0.0485382	-4.35016	Up-Regulated
RUNX3	1.12433	5.04987	2.40195	0.0166144	0.0492906	-4.36476	Up-Regulated
DNAH9	-3.11141	3.31024	-45.6205	4.05203e-196	4.87946e-192	434.777	Down-Regulated
CCL15	-2.96002	3.69757	-36.8153	2.57917e-155	1.55292e-151	342.58	Down-Regulated
FGF14	-2.13736	3.31128	-31.8784	1.14482e-130	4.59531e-127	286.653	Down-Regulated
C6	-6.00377	3.85825	-29.6182	5.05323e-119	1.52128e-115	260.182	Down-Regulated
SERPINA6	-3.61276	3.54331	-29.0769	3.31208e-116	7.97681e-113	253.775	Down-Regulated
GSTA3	-3.61183	4.05371	-23.9506	3.3998e-89	6.82339e-86	192.266	Down-Regulated
C14orf105	-2.16931	3.28066	-23.3872	3.27283e-86	5.6302e-83	185.465	Down-Regulated
ADH6	-1.11284	3.37373	-22.3182	1.4672e-80	2.2085e-77	172.582	Down-Regulated
DNAI2	-2.27865	3.27	-21.7166	2.17845e-77	2.91477e-74	165.35	Down-Regulated
CRISP2	-2.92575	3.47651	-21.1621	1.79038e-74	2.15598e-71	158.703	Down-Regulated
CCL21	-3.21174	3.79581	-19.6085	2.27863e-66	2.49448e-63	140.218	Down-Regulated
FLJ21511	-2.14417	3.21973	-19.5904	2.82602e-66	2.83591e-63	140.005	Down-Regulated
CCDC33	-1.69418	3.39591	-19.1934	3.18084e-64	2.94643e-61	135.326	Down-Regulated
CCDC81	-2.85963	3.60708	-19.1577	4.85969e-64	4.18003e-61	134.906	Down-Regulated
SRD5A2	-2.23995	3.89211	-19.0228	2.4052e-63	1.9309e-60	133.322	Down-Regulated
SPAG6	-4.11548	3.34827	-18.3626	5.79428e-60	4.36092e-57	125.608	Down-Regulated
DNAH3	-1.67864	3.73496	-18.1644	5.92116e-59	4.19427e-56	123.305	Down-Regulated
LRRC48	-4.0234	3.76469	-17.6915	1.46994e-56	9.83392e-54	117.843	Down-Regulated
MYH11	-4.18005	4.4789	-17.4842	1.62736e-55	1.0314e-52	115.461	Down-Regulated
LOC200383	-2.39082	3.82034	-17.2489	2.46422e-54	1.48371e-51	112.769	Down-Regulated
CLEC3B	-2.62336	3.73099	-17.0889	1.55418e-53	8.91212e-51	110.945	Down-Regulated
EFCAB6	-1.29079	3.63804	-16.7997	4.26587e-52	2.33498e-49	107.663	Down-Regulated
DNAI1	-2.56739	3.86354	-16.2625	1.90459e-49	9.97178e-47	101.62	Down-Regulated
EMCN	-1.88381	3.4986	-15.9036	1.07608e-47	5.39921e-45	97.6243	Down-Regulated
DLEC1	-1.34254	3.5275	-15.751	5.91874e-47	2.85094e-44	95.9359	Down-Regulated
RTDR1	-1.57447	4.52635	-15.2083	2.4077e-44	1.11513e-41	89.9858	Down-Regulated
SOX3	-2.92557	3.38661	-14.927	5.22811e-43	2.33174e-40	86.938	Down-Regulated
DES	-2.1899	3.99376	-14.8843	8.32769e-43	3.5815e-40	86.477	Down-Regulated
NXF3	-3.69855	3.35482	-14.8468	1.25173e-42	5.19768e-40	86.0735	Down-Regulated
CRISP3	-8.07061	3.72473	-14.6721	8.32164e-42	3.34031e-39	84.1979	Down-Regulated
IQCH	-1.08473	3.01358	-14.5839	2.15813e-41	8.38328e-39	83.2545	Down-Regulated
C4orf31	-3.46527	3.91827	-14.4993	5.36316e-41	2.01823e-38	82.3532	Down-Regulated
FHL5	-1.45009	3.09417	-14.377	1.99454e-40	7.27825e-38	81.053	Down-Regulated
PACRG	-3.52552	3.6668	-14.1849	1.55118e-39	5.49392e-37	79.0224	Down-Regulated
WDR78	-2.21698	4.00615	-13.8327	6.43326e-38	2.09376e-35	75.3354	Down-Regulated
MMRN1	-1.18515	2.92027	-13.8254	6.94757e-38	2.20165e-35	75.2593	Down-Regulated
ACSBG1	-1.00677	3.5863	-13.7337	1.81795e-37	5.61328e-35	74.3073	Down-Regulated
SDPR	-1.6039	3.34702	-13.7095	2.34185e-37	7.05014e-35	74.0567	Down-Regulated
PDE8B	-2.37181	3.91285	-13.6624	3.83169e-37	1.1254e-34	73.5694	Down-Regulated
CCDC69	-2.56608	4.17083	-13.6373	4.98095e-37	1.42811e-34	73.3098	Down-Regulated
EFCAB1	-3.52834	3.63137	-13.3895	6.53738e-36	1.78916e-33	70.7622	Down-Regulated
DNAH7	-2.46277	3.61493	-13.2202	3.7402e-35	1.00088e-32	69.0365	Down-Regulated
LRRC50	-3.18158	4.29402	-12.8891	1.09527e-33	2.80621e-31	65.6957	Down-Regulated
HLF	-1.02646	3.35302	-12.8705	1.32228e-33	3.31727e-31	65.5093	Down-Regulated
FLJ22655	-1.55865	3.44237	-12.6483	1.23952e-32	3.04617e-30	63.2958	Down-Regulated
C6orf97	-2.55134	4.07502	-12.6214	1.62192e-32	3.90623e-30	63.0299	Down-Regulated
KCNMB1	-1.83153	3.57878	-12.6063	1.88713e-32	4.45584e-30	62.8801	Down-Regulated
C11orf16	-1.56137	4.08858	-12.5608	2.97438e-32	6.88797e-30	62.4302	Down-Regulated
APOD	-3.61723	4.57167	-12.483	6.45375e-32	1.46634e-29	61.6641	Down-Regulated
GSTM5	-1.81878	3.69525	-12.399	1.48637e-31	3.25433e-29	60.8392	Down-Regulated
SLC27A2	-2.58612	3.8786	-12.3648	2.08479e-31	4.48304e-29	60.5046	Down-Regulated
SLITRK5	-3.64868	4.01942	-12.1233	2.24439e-30	4.65982e-28	58.1552	Down-Regulated
PTPRN2	-1.9876	3.61279	-12.0048	7.12614e-30	1.45446e-27	57.0131	Down-Regulated
PLN	-2.12216	3.35738	-11.9537	1.17041e-29	2.3105e-27	56.5226	Down-Regulated
ABCA8	-3.90977	3.76991	-11.9423	1.30691e-29	2.49807e-27	56.4136	Down-Regulated
PLAC8	-3.93601	4.64857	-11.877	2.46013e-29	4.62889e-27	55.7884	Down-Regulated
CCDC19	-2.96244	4.86292	-11.8723	2.57457e-29	4.76969e-27	55.7434	Down-Regulated
LRP2BP	-2.15381	3.45591	-11.8062	4.86858e-29	8.88294e-27	55.1137	Down-Regulated
TSNAXIP1	-1.32933	4.08561	-11.7643	7.28845e-29	1.30996e-26	54.715	Down-Regulated
CNN1	-2.84038	4.97029	-11.5782	4.31513e-28	7.53084e-26	52.9576	Down-Regulated
IL7	-2.34683	3.2962	-11.5565	5.30422e-28	9.12477e-26	52.7537	Down-Regulated
NELL2	-4.6961	4.79844	-11.5384	6.29666e-28	1.06795e-25	52.5842	Down-Regulated
LRRC23	-3.50005	4.6475	-11.5039	8.73445e-28	1.46084e-25	52.2609	Down-Regulated
LMOD1	-1.31462	3.96473	-11.3146	5.20627e-27	8.5882e-25	50.4973	Down-Regulated
HBD	-1.07474	3.17758	-11.2848	6.8792e-27	1.11945e-24	50.2221	Down-Regulated
GBA3	-1.48771	3.06901	-11.2217	1.2404e-26	1.99158e-24	49.6398	Down-Regulated
DPT	-2.11706	3.64615	-10.9912	1.05012e-25	1.62122e-23	47.5304	Down-Regulated
FGG	-1.19626	3.06668	-10.9329	1.79476e-25	2.73576e-23	47.0011	Down-Regulated
TPPP3	-4.52145	5.30699	-10.9248	1.93255e-25	2.90897e-23	46.9281	Down-Regulated
ZMYND10	-2.82258	3.94623	-10.7714	7.84065e-25	1.13756e-22	45.5455	Down-Regulated
CMAH	-2.00421	3.56013	-10.3191	4.50825e-23	6.24004e-21	41.5472	Down-Regulated
C9orf116	-2.68378	5.32776	-10.3176	4.56649e-23	6.24883e-21	41.5345	Down-Regulated
TSGA10	-1.54444	3.72576	-10.1563	1.88222e-22	2.46366e-20	40.1375	Down-Regulated
SLC22A4	-2.93602	4.12992	-10.1471	2.03984e-22	2.64126e-20	40.0582	Down-Regulated
PGR	-1.51315	3.08512	-10.0506	4.72394e-22	6.05167e-20	39.2301	Down-Regulated
CFD	-3.06055	4.9707	-10.0272	5.78515e-22	7.33313e-20	39.0303	Down-Regulated
DARC	-2.12284	3.98845	-9.99752	7.47925e-22	9.28507e-20	38.777	Down-Regulated
FHOD3	-1.70946	3.99525	-9.97932	8.75182e-22	1.0754e-19	38.6221	Down-Regulated
LAMA2	-1.71242	3.84933	-9.86984	2.24288e-21	2.70087e-19	37.6943	Down-Regulated
ABCG2	-1.44664	4.1014	-9.83771	2.95214e-21	3.45143e-19	37.4235	Down-Regulated
CNGA1	-1.86637	3.20163	-9.79166	4.37222e-21	5.01431e-19	37.0364	Down-Regulated
CPA3	-1.96997	3.7624	-9.72333	7.81205e-21	8.79184e-19	36.4644	Down-Regulated
OVGP1	-6.69991	5.24048	-9.69034	1.03276e-20	1.15153e-18	36.1893	Down-Regulated
IGFBP6	-3.38472	4.87538	-9.68517	1.07895e-20	1.19199e-18	36.1462	Down-Regulated
C14orf45	-2.39513	5.25563	-9.65792	1.35799e-20	1.48662e-18	35.9195	Down-Regulated
LYVE1	-2.07347	3.89663	-9.64625	1.49838e-20	1.62554e-18	35.8226	Down-Regulated
CDKL1	-1.1922	3.94605	-9.59385	2.32805e-20	2.50307e-18	35.3884	Down-Regulated
ANXA13	-2.887	3.77379	-9.5503	3.35311e-20	3.57329e-18	35.029	Down-Regulated
SPAG8	-1.07158	3.21425	-9.50941	4.71829e-20	4.984e-18	34.6925	Down-Regulated
KCNJ2	-3.1575	5.14192	-9.4924	5.43736e-20	5.69363e-18	34.5528	Down-Regulated
COL21A1	-1.632	3.37306	-9.39424	1.22791e-19	1.24256e-17	33.7504	Down-Regulated
RTN1	-2.48832	4.2568	-9.29672	2.74161e-19	2.72847e-17	32.9595	Down-Regulated
TTYH1	-3.51118	3.85279	-9.278	3.1965e-19	3.1551e-17	32.8083	Down-Regulated
TEKT2	-2.9319	4.27229	-9.27193	3.35946e-19	3.289e-17	32.7594	Down-Regulated
KBTBD11	-1.33386	3.58981	-9.24663	4.13197e-19	4.01267e-17	32.5556	Down-Regulated
SCUBE2	-2.80633	4.37009	-9.13336	1.03858e-18	9.77074e-17	31.6483	Down-Regulated
FLJ23049	-3.43597	3.86807	-9.09642	1.40029e-18	1.30716e-16	31.3542	Down-Regulated
DKFZP586H2123	-2.56674	4.39022	-9.07971	1.60248e-18	1.48439e-16	31.2215	Down-Regulated
SPARCL1	-2.93356	8.64732	-9.0696	1.7385e-18	1.59809e-16	31.1413	Down-Regulated
SELP	-1.2095	3.6104	-8.89627	6.95958e-18	6.07299e-16	29.7765	Down-Regulated
FABP1	-1.18456	3.37718	-8.78176	1.72118e-17	1.45961e-15	28.8859	Down-Regulated
ACTG2	-4.26467	5.08599	-8.7455	2.28845e-17	1.92709e-15	28.6058	Down-Regulated
EFHC2	-1.84711	3.99106	-8.7042	3.16218e-17	2.62613e-15	28.2878	Down-Regulated
BCHE	-2.78226	3.4644	-8.68772	3.59684e-17	2.96666e-15	28.1612	Down-Regulated
AGBL2	-1.51897	3.36638	-8.6587	4.50982e-17	3.69437e-15	27.9388	Down-Regulated
SPA17	-3.12225	6.11349	-8.52382	1.28116e-16	1.0217e-14	26.9126	Down-Regulated
HNF1B	-2.27736	5.34189	-8.48085	1.78211e-16	1.39352e-14	26.5882	Down-Regulated
GPRASP1	-1.70704	3.9667	-8.47499	1.86394e-16	1.4481e-14	26.5441	Down-Regulated
C9orf9	-2.14589	4.50807	-8.45911	2.10493e-16	1.61449e-14	26.4247	Down-Regulated
C9orf61	-2.17051	4.11081	-8.45283	2.20862e-16	1.68331e-14	26.3774	Down-Regulated
ALDH1A2	-2.95122	4.05823	-8.44278	2.38495e-16	1.80626e-14	26.302	Down-Regulated
TACC1	-1.97263	5.1031	-8.42397	2.75312e-16	2.07207e-14	26.1609	Down-Regulated
TFF3	-4.25714	4.74159	-8.40999	3.06257e-16	2.29065e-14	26.0563	Down-Regulated
C1orf114	-2.51029	3.80645	-8.39419	3.4541e-16	2.5518e-14	25.9381	Down-Regulated
LGALS4	-1.21596	3.94762	-8.37244	4.07465e-16	2.99188e-14	25.7758	Down-Regulated
AGR2	-5.68733	5.37793	-8.36708	4.24386e-16	3.09724e-14	25.7358	Down-Regulated
LOC201229	-1.23346	4.67715	-8.35977	4.48588e-16	3.25416e-14	25.6813	Down-Regulated
MAOB	-3.72353	5.68483	-8.35798	4.54723e-16	3.27891e-14	25.668	Down-Regulated
AK1	-2.29019	5.84542	-8.35026	4.821e-16	3.45563e-14	25.6106	Down-Regulated
SOCS2	-1.42074	4.30424	-8.33062	5.59378e-16	3.9392e-14	25.4646	Down-Regulated
ALDH1A1	-3.70188	5.05213	-8.32727	5.73713e-16	4.01666e-14	25.4397	Down-Regulated
NME5	-3.45253	5.88754	-8.30238	6.92366e-16	4.79165e-14	25.2551	Down-Regulated
SPEF1	-1.17694	3.62669	-8.2997	7.06499e-16	4.86152e-14	25.2352	Down-Regulated
CXorf57	-1.419	3.11738	-8.29546	7.2945e-16	4.99093e-14	25.2038	Down-Regulated
FLJ22167	-2.57285	5.88471	-8.24565	1.0609e-15	7.17716e-14	24.836	Down-Regulated
ABHD6	-1.02204	4.10685	-8.21683	1.31662e-15	8.75955e-14	24.624	Down-Regulated
OGN	-2.32412	3.37781	-8.20619	1.42571e-15	9.43316e-14	24.5458	Down-Regulated
NEK1	-1.16971	4.64139	-8.11824	2.74391e-15	1.75757e-13	23.9031	Down-Regulated
MAK	-1.97475	3.75553	-8.04837	4.59834e-15	2.91438e-13	23.3965	Down-Regulated
CES1	-1.9011	3.83465	-8.02367	5.51449e-15	3.4407e-13	23.2182	Down-Regulated
DUOX1	-2.09858	3.92753	-7.99046	7.03559e-15	4.36714e-13	22.9792	Down-Regulated
TRAF3IP2	-1.79781	6.24554	-7.94609	9.72996e-15	6.00862e-13	22.6611	Down-Regulated
NBEA	-2.52366	3.96446	-7.93709	1.0389e-14	6.3184e-13	22.5968	Down-Regulated
ATP2C2	-1.48104	3.78657	-7.8566	1.86312e-14	1.08911e-12	22.024	Down-Regulated
COX7A1	-2.08694	4.60921	-7.84644	2.00498e-14	1.16638e-12	21.952	Down-Regulated
MAOA	-2.43785	4.49249	-7.84493	2.02701e-14	1.17352e-12	21.9413	Down-Regulated
SLC27A6	-2.89118	4.26887	-7.82547	2.3324e-14	1.33746e-12	21.8037	Down-Regulated
MYLK	-2.8513	7.19041	-7.74255	4.22834e-14	2.36826e-12	21.2205	Down-Regulated
FRY	-1.16334	3.99744	-7.73784	4.3731e-14	2.438e-12	21.1875	Down-Regulated
ADH1B	-2.84311	3.72353	-7.70048	5.70772e-14	3.15286e-12	20.9265	Down-Regulated
DYNC2H1	-1.73072	4.96535	-7.69651	5.8711e-14	3.2283e-12	20.8988	Down-Regulated
HBA2	-4.60354	6.71489	-7.67373	6.90237e-14	3.77811e-12	20.7403	Down-Regulated
DKFZP564J102	-1.8748	3.87804	-7.6727	6.95265e-14	3.78841e-12	20.7331	Down-Regulated
IK	-1.22541	6.52005	-7.61594	1.03883e-13	5.53524e-12	20.3397	Down-Regulated
IFT88	-1.5028	5.61573	-7.60963	1.08603e-13	5.76125e-12	20.2962	Down-Regulated
STAG3	-1.28238	4.42291	-7.60462	1.12505e-13	5.94203e-12	20.2616	Down-Regulated
TFPI	-1.30424	3.4984	-7.58437	1.29741e-13	6.79279e-12	20.122	Down-Regulated
CASQ2	-1.19897	3.69698	-7.56446	1.49213e-13	7.77847e-12	19.985	Down-Regulated
WRB	-2.04875	7.30262	-7.55162	1.6326e-13	8.47403e-12	19.8969	Down-Regulated
C11orf63	-1.31709	3.99878	-7.54587	1.69975e-13	8.7847e-12	19.8574	Down-Regulated
FBXW7	-1.07859	4.43106	-7.48735	2.55728e-13	1.31601e-11	19.4574	Down-Regulated
RASL12	-1.19401	3.77028	-7.47689	2.75016e-13	1.40328e-11	19.3862	Down-Regulated
TCTN1	-1.96534	6.27724	-7.46745	2.93657e-13	1.49208e-11	19.322	Down-Regulated
CLDN5	-1.4921	4.33743	-7.46374	3.01322e-13	1.52459e-11	19.2968	Down-Regulated
RAB36	-1.62761	4.42549	-7.42621	3.90777e-13	1.94452e-11	19.0423	Down-Regulated
C14orf132	-2.94978	5.31236	-7.41625	4.18633e-13	2.06606e-11	18.9749	Down-Regulated
C4BPA	-2.15933	3.98713	-7.4043	4.54624e-13	2.23452e-11	18.8941	Down-Regulated
PDK4	-1.22947	3.77102	-7.34408	6.87753e-13	3.32607e-11	18.489	Down-Regulated
EFHC1	-2.68631	6.09725	-7.33318	7.41038e-13	3.5411e-11	18.416	Down-Regulated
COQ4	-1.43329	5.9578	-7.24582	1.34358e-12	6.29548e-11	17.8338	Down-Regulated
CBX7	-1.75496	5.00025	-7.21902	1.61081e-12	7.48935e-11	17.6564	Down-Regulated
SFRP4	-3.64851	5.13007	-7.21784	1.6237e-12	7.52024e-11	17.6486	Down-Regulated
KIAA0556	-1.28326	5.10121	-7.2091	1.72248e-12	7.94714e-11	17.5909	Down-Regulated
HSPA1L	-1.1435	4.38071	-7.12171	3.09822e-12	1.38181e-10	17.0169	Down-Regulated
SCAMP4	-1.31052	4.42809	-7.10468	3.4713e-12	1.53681e-10	16.9058	Down-Regulated
SOD3	-1.83059	3.96735	-7.02832	5.7652e-12	2.51538e-10	16.41	Down-Regulated
IL20RA	-1.93619	4.08468	-7.01545	6.27674e-12	2.71887e-10	16.3269	Down-Regulated
PIP	-2.13797	3.99675	-7.00655	6.65681e-12	2.87316e-10	16.2695	Down-Regulated
IGFBP4	-2.74845	6.60254	-6.99918	6.98846e-12	3.00554e-10	16.222	Down-Regulated
CETN2	-1.66149	9.47111	-6.99379	7.24078e-12	3.10297e-10	16.1873	Down-Regulated
CIRBP	-1.70702	7.67021	-6.96916	8.51456e-12	3.62305e-10	16.029	Down-Regulated
PLCL2	-1.41198	4.42013	-6.92164	1.16241e-11	4.9288e-10	15.725	Down-Regulated
PID1	-1.6289	3.91248	-6.86403	1.69134e-11	6.97503e-10	15.3589	Down-Regulated
REEP1	-2.08852	4.32774	-6.80695	2.44644e-11	9.98644e-10	14.9986	Down-Regulated
RABL4	-1.84471	5.67381	-6.79327	2.67176e-11	1.07603e-09	14.9126	Down-Regulated
RIMBP2	-1.89494	3.62859	-6.79046	2.72045e-11	1.09199e-09	14.895	Down-Regulated
ADRB2	-1.04372	3.5849	-6.78268	2.85992e-11	1.14416e-09	14.8462	Down-Regulated
HBB	-4.42705	7.28768	-6.70379	4.73654e-11	1.87008e-09	14.354	Down-Regulated
GNB5	-1.39612	4.98923	-6.69426	5.03246e-11	1.98042e-09	14.2949	Down-Regulated
CDKN1A	-1.81497	6.00122	-6.69101	5.13741e-11	2.01514e-09	14.2748	Down-Regulated
RIMS2	-1.4599	4.5685	-6.6895	5.18688e-11	2.02794e-09	14.2654	Down-Regulated
SLC24A3	-2.17433	4.93145	-6.68638	5.29082e-11	2.06188e-09	14.2461	Down-Regulated
PTPRT	-1.54192	3.22718	-6.6801	5.5061e-11	2.13198e-09	14.2072	Down-Regulated
RIBC2	-2.03665	4.19902	-6.671	5.83312e-11	2.25136e-09	14.1509	Down-Regulated
FLJ21062	-1.50073	4.42938	-6.66028	6.24315e-11	2.39788e-09	14.0847	Down-Regulated
EPB41L3	-1.57667	3.89819	-6.65985	6.26004e-11	2.39788e-09	14.082	Down-Regulated
B9D1	-1.0594	4.41648	-6.65954	6.27248e-11	2.39788e-09	14.0801	Down-Regulated
CBY1	-1.38269	7.34812	-6.65641	6.39769e-11	2.438e-09	14.0608	Down-Regulated
KLF4	-1.76957	4.53447	-6.63039	7.54078e-11	2.83769e-09	13.9006	Down-Regulated
CORO2B	-1.65958	4.1558	-6.6096	8.59614e-11	3.20479e-09	13.7729	Down-Regulated
ENPP2	-2.44638	5.6857	-6.60858	8.65144e-11	3.21545e-09	13.7666	Down-Regulated
KIF13B	-1.53604	5.14232	-6.58648	9.93934e-11	3.6745e-09	13.6314	Down-Regulated
KLF2	-1.79511	5.67782	-6.58635	9.94758e-11	3.6745e-09	13.6306	Down-Regulated
RUVBL2	-1.28584	8.10838	-6.58309	1.01531e-10	3.73896e-09	13.6106	Down-Regulated
PCDH17	-2.20006	4.96046	-6.55574	1.20492e-10	4.38363e-09	13.4438	Down-Regulated
DIXDC1	-1.43694	4.48604	-6.54429	1.29415e-10	4.69403e-09	13.3741	Down-Regulated
LTC4S	-1.55211	4.5611	-6.51119	1.59042e-10	5.68303e-09	13.1733	Down-Regulated
OSR2	-2.64334	4.93256	-6.46651	2.09761e-10	7.38581e-09	12.9037	Down-Regulated
CHST4	-2.22424	4.41672	-6.45215	2.29209e-10	8.00039e-09	12.8173	Down-Regulated
NR2F1	-1.66388	4.84485	-6.43852	2.49285e-10	8.60139e-09	12.7356	Down-Regulated
ZNF688	-1.03293	4.33609	-6.43249	2.58716e-10	8.90132e-09	12.6994	Down-Regulated
IL33	-1.19317	3.26671	-6.43185	2.59734e-10	8.91087e-09	12.6956	Down-Regulated
FOXJ1	-2.6712	5.19966	-6.39286	3.29939e-10	1.10059e-08	12.4627	Down-Regulated
MB	-1.62552	4.24033	-6.38788	3.40137e-10	1.13147e-08	12.4331	Down-Regulated
PLA2G2A	-2.20512	4.26326	-6.37992	3.57096e-10	1.18462e-08	12.3857	Down-Regulated
CLUAP1	-1.10112	5.09783	-6.35904	4.05625e-10	1.32732e-08	12.2617	Down-Regulated
CCDC28A	-1.52108	6.38971	-6.31972	5.15119e-10	1.66302e-08	12.0291	Down-Regulated
KLRB1	-1.2109	3.98089	-6.31083	5.43617e-10	1.75033e-08	11.9768	Down-Regulated
C16orf30	-1.07298	4.23628	-6.27967	6.56245e-10	2.09615e-08	11.7936	Down-Regulated
RPS27L	-1.18579	8.40578	-6.26527	7.15748e-10	2.2504e-08	11.7092	Down-Regulated
BBS1	-1.38412	7.15945	-6.26453	7.18908e-10	2.25445e-08	11.7049	Down-Regulated
GNG11	-1.8433	6.76438	-6.25243	7.73175e-10	2.40583e-08	11.6341	Down-Regulated
AOC3	-2.01993	3.94627	-6.22562	9.08096e-10	2.78961e-08	11.4777	Down-Regulated
CHGB	-1.08899	3.15632	-6.21653	9.58846e-10	2.93802e-08	11.4248	Down-Regulated
TENC1	-1.18746	5.13412	-6.20032	1.05634e-09	3.20413e-08	11.3307	Down-Regulated
PIP3-E	-1.43169	4.09391	-6.19431	1.09486e-09	3.30516e-08	11.2959	Down-Regulated
IQCK	-1.47844	6.17604	-6.19427	1.09513e-09	3.30516e-08	11.2956	Down-Regulated
ITM2A	-2.01508	5.17822	-6.18878	1.13152e-09	3.39795e-08	11.2639	Down-Regulated
FUCA1	-1.45029	8.39861	-6.1762	1.21954e-09	3.60827e-08	11.1911	Down-Regulated
PIK3R1	-1.67911	5.77645	-6.17424	1.23382e-09	3.6416e-08	11.1797	Down-Regulated
PKIG	-1.74028	7.58542	-6.14113	1.50163e-09	4.38898e-08	10.9889	Down-Regulated
GCNT3	-1.77625	4.10647	-6.12973	1.6064e-09	4.63891e-08	10.9233	Down-Regulated
NUP62CL	-1.48551	3.77439	-6.10713	1.83556e-09	5.21318e-08	10.7938	Down-Regulated
MEGF9	-1.12406	5.04108	-6.09193	2.00742e-09	5.68784e-08	10.7068	Down-Regulated
C14orf140	-1.08789	4.17166	-6.07819	2.17612e-09	6.12262e-08	10.6285	Down-Regulated
KCNMB2	-2.04327	4.45611	-6.07478	2.22009e-09	6.2317e-08	10.609	Down-Regulated
TCN1	-1.27617	3.55786	-6.06963	2.28813e-09	6.39295e-08	10.5797	Down-Regulated
GJA4	-1.69602	5.04459	-6.05408	2.50624e-09	6.97002e-08	10.4913	Down-Regulated
EPHX2	-1.57219	4.50304	-6.05291	2.52341e-09	7.0016e-08	10.4847	Down-Regulated
LDB2	-1.5498	4.54654	-6.0242	2.98377e-09	8.14751e-08	10.322	Down-Regulated
SERPINA3	-3.97407	6.19231	-6.0222	3.01886e-09	8.18763e-08	10.3106	Down-Regulated
SFRP1	-2.87874	4.5008	-5.93514	4.99662e-09	1.33118e-07	9.82162	Down-Regulated
PPBP	-1.03912	3.11978	-5.91467	5.62022e-09	1.48094e-07	9.70754	Down-Regulated
KCNB1	-1.24483	3.66416	-5.86135	7.62259e-09	1.96135e-07	9.41202	Down-Regulated
TST	-1.66921	7.72158	-5.81308	1.00234e-08	2.54109e-07	9.14663	Down-Regulated
KIAA1324	-1.67925	3.82862	-5.81184	1.00941e-08	2.55364e-07	9.13981	Down-Regulated
TTC12	-1.19534	4.64022	-5.80168	1.06901e-08	2.69311e-07	9.08422	Down-Regulated
FXYD1	-2.36025	4.23739	-5.77091	1.27126e-08	3.18265e-07	8.91634	Down-Regulated
G0S2	-1.78684	5.29233	-5.75774	1.36881e-08	3.37771e-07	8.84473	Down-Regulated
HOXA5	-3.159	4.5987	-5.75366	1.40055e-08	3.43492e-07	8.82253	Down-Regulated
STARD13	-1.1626	4.60601	-5.74109	1.50266e-08	3.66297e-07	8.75437	Down-Regulated
ChGn	-1.57659	4.21214	-5.73936	1.5173e-08	3.69119e-07	8.74498	Down-Regulated
GLTSCR2	-1.1579	11.1922	-5.73889	1.52126e-08	3.69336e-07	8.74245	Down-Regulated
SNED1	-1.27171	4.10742	-5.71375	1.75044e-08	4.20736e-07	8.60657	Down-Regulated
FAM46A	-1.82865	6.45916	-5.70506	1.83725e-08	4.38973e-07	8.55971	Down-Regulated
MNS1	-1.73267	4.83569	-5.69215	1.97394e-08	4.67916e-07	8.49024	Down-Regulated
RASSF2	-1.61259	5.28381	-5.66774	2.26002e-08	5.30509e-07	8.35924	Down-Regulated
CYB5R3	-1.06783	9.41075	-5.66077	2.34886e-08	5.4902e-07	8.32193	Down-Regulated
TTC26	-1.04339	4.47308	-5.65445	2.43243e-08	5.63295e-07	8.2881	Down-Regulated
LRRC49	-1.69845	4.90713	-5.64989	2.49434e-08	5.74319e-07	8.26378	Down-Regulated
SESN1	-1.34355	5.2028	-5.64845	2.51426e-08	5.77194e-07	8.25608	Down-Regulated
PPAP2C	-2.21667	5.04113	-5.6483	2.51641e-08	5.77194e-07	8.25525	Down-Regulated
DDAH1	-1.71013	8.23368	-5.6412	2.61693e-08	5.9797e-07	8.21735	Down-Regulated
ZBTB16	-1.86139	3.79663	-5.61936	2.95107e-08	6.67986e-07	8.1011	Down-Regulated
SERPINB6	-1.62941	7.34147	-5.61567	3.01144e-08	6.8037e-07	8.08151	Down-Regulated
GCLC	-1.35067	5.99623	-5.58264	3.60886e-08	7.98142e-07	7.90648	Down-Regulated
PAK3	-1.10985	3.82688	-5.54383	4.4585e-08	9.65633e-07	7.70208	Down-Regulated
CSRP1	-1.35697	8.91368	-5.51667	5.16567e-08	1.09903e-06	7.55978	Down-Regulated
C21orf59	-1.19053	8.12987	-5.50547	5.48797e-08	1.15941e-06	7.5013	Down-Regulated
GPR124	-1.05533	4.41916	-5.49404	5.83728e-08	1.22036e-06	7.44168	Down-Regulated
RGS5	-1.69323	6.29982	-5.49266	5.88062e-08	1.22305e-06	7.43453	Down-Regulated
AR	-1.95074	4.91146	-5.47541	6.45276e-08	1.32828e-06	7.34484	Down-Regulated
PTGS2	-1.55945	3.69007	-5.47061	6.62155e-08	1.35838e-06	7.3199	Down-Regulated
CKB	-2.29004	7.48212	-5.46555	6.80397e-08	1.39343e-06	7.29365	Down-Regulated
IGBP1	-1.12611	7.69211	-5.46144	6.95557e-08	1.42078e-06	7.27237	Down-Regulated
NPDC1	-1.88357	5.8662	-5.43962	7.81775e-08	1.57955e-06	7.15952	Down-Regulated
BLCAP	-1.05919	8.79928	-5.4265	8.38488e-08	1.68285e-06	7.0919	Down-Regulated
SRGAP3	-1.09846	4.87894	-5.42044	8.66041e-08	1.7295e-06	7.06069	Down-Regulated
KIAA0247	-1.49146	7.06774	-5.41949	8.70445e-08	1.73541e-06	7.05579	Down-Regulated
ANKRD25	-1.18623	6.24427	-5.41274	9.023e-08	1.79074e-06	7.02109	Down-Regulated
C10orf56	-1.63713	5.29032	-5.41266	9.02656e-08	1.79074e-06	7.02071	Down-Regulated
FCGBP	-2.86755	5.96298	-5.41038	9.13705e-08	1.80671e-06	7.00897	Down-Regulated
RNASE4	-1.84052	4.83318	-5.39501	9.91475e-08	1.94136e-06	6.93013	Down-Regulated
MGP	-2.6456	7.68205	-5.3905	1.01546e-07	1.9851e-06	6.90705	Down-Regulated
SLC22A5	-1.22617	5.02743	-5.38526	1.04412e-07	2.0378e-06	6.8802	Down-Regulated
STXBP1	-1.64141	6.51794	-5.37915	1.07846e-07	2.09804e-06	6.84897	Down-Regulated
TSPAN1	-3.44759	6.66901	-5.37843	1.08256e-07	2.10261e-06	6.84531	Down-Regulated
COBL	-2.08578	5.69406	-5.37588	1.09728e-07	2.12777e-06	6.83228	Down-Regulated
MAPK10	-1.06348	3.87068	-5.37333	1.1122e-07	2.15323e-06	6.81925	Down-Regulated
AMPH	-1.41971	4.15276	-5.35333	1.23612e-07	2.359e-06	6.71733	Down-Regulated
FBLN1	-1.37065	4.93354	-5.31563	1.50708e-07	2.84011e-06	6.52617	Down-Regulated
AMIGO2	-2.73649	6.37171	-5.29145	1.71036e-07	3.19817e-06	6.40417	Down-Regulated
MCAT	-1.12108	5.98243	-5.2891	1.73146e-07	3.23259e-06	6.39236	Down-Regulated
TERF2	-1.28733	6.56034	-5.28103	1.80584e-07	3.35069e-06	6.35181	Down-Regulated
RICS	-1.37734	4.97957	-5.2779	1.83563e-07	3.3955e-06	6.33604	Down-Regulated
CES2	-1.02541	5.49149	-5.25886	2.0267e-07	3.70905e-06	6.24061	Down-Regulated
CILP	-2.8281	5.78351	-5.25768	2.03923e-07	3.72631e-06	6.23467	Down-Regulated
RICH2	-1.18848	4.2204	-5.25	2.12208e-07	3.86597e-06	6.1963	Down-Regulated
PPP2R2B	-1.28354	3.96393	-5.24213	2.21047e-07	3.99078e-06	6.15697	Down-Regulated
CDH12	-1.68234	3.77941	-5.21148	2.5898e-07	4.61337e-06	6.00441	Down-Regulated
WFS1	-1.34023	6.05724	-5.20798	2.63699e-07	4.6905e-06	5.98702	Down-Regulated
CPEB1	-1.10968	3.7657	-5.19188	2.86472e-07	5.0508e-06	5.90726	Down-Regulated
VNN2	-1.38305	3.944	-5.18589	2.95424e-07	5.20102e-06	5.87763	Down-Regulated
HDHD1A	-1.54401	7.31906	-5.17972	3.04922e-07	5.35258e-06	5.84716	Down-Regulated
ANKMY2	-1.54079	7.32459	-5.16731	3.24932e-07	5.679e-06	5.78598	Down-Regulated
PKD2	-1.04935	5.73157	-5.16	3.37313e-07	5.88685e-06	5.74998	Down-Regulated
KRT20	-1.00731	3.01864	-5.15325	3.4914e-07	6.07563e-06	5.71681	Down-Regulated
PRUNE2	-1.92784	5.24779	-5.15179	3.51764e-07	6.11247e-06	5.70961	Down-Regulated
VIM	-1.62874	10.4809	-5.13974	3.74046e-07	6.4531e-06	5.6505	Down-Regulated
FABP6	-3.02501	4.62724	-5.1372	3.78916e-07	6.52777e-06	5.63805	Down-Regulated
AQP1	-1.48774	5.02541	-5.12864	3.95789e-07	6.77964e-06	5.59614	Down-Regulated
TACC2	-1.47524	5.80955	-5.12045	4.12617e-07	7.00808e-06	5.55608	Down-Regulated
SRR	-1.14945	5.12951	-5.10897	4.37358e-07	7.36597e-06	5.50006	Down-Regulated
C19orf28	-1.31838	6.20241	-5.09727	4.64052e-07	7.78289e-06	5.44307	Down-Regulated
AIM1	-2.0394	6.0517	-5.08573	4.91921e-07	8.15938e-06	5.38699	Down-Regulated
RRAGD	-1.79343	7.16507	-5.06527	5.45353e-07	8.92275e-06	5.28784	Down-Regulated
C14orf139	-1.25539	4.1577	-5.06203	5.54312e-07	9.05703e-06	5.27218	Down-Regulated
SATB1	-2.02919	6.08214	-5.05848	5.64308e-07	9.20786e-06	5.255	Down-Regulated
EFEMP1	-2.53896	5.52145	-5.05762	5.66725e-07	9.23478e-06	5.25089	Down-Regulated
ANG	-1.49222	4.7406	-5.04549	6.02322e-07	9.77515e-06	5.19233	Down-Regulated
NEK11	-1.36406	5.27898	-5.04004	6.19005e-07	1.00189e-05	5.16608	Down-Regulated
FOXL2	-1.4345	3.72627	-5.03769	6.26321e-07	1.01101e-05	5.15478	Down-Regulated
PMM1	-1.05813	5.07063	-5.015	7.01558e-07	1.12193e-05	5.04578	Down-Regulated
CRELD2	-1.16173	6.74759	-4.99733	7.66113e-07	1.21229e-05	4.96122	Down-Regulated
WDR77	-1.25602	6.38613	-4.96449	9.01611e-07	1.39374e-05	4.80484	Down-Regulated
HSPB8	-1.66476	5.01577	-4.95944	9.24402e-07	1.42328e-05	4.78087	Down-Regulated
EPB41L2	-1.72117	6.05139	-4.95519	9.44053e-07	1.44635e-05	4.76068	Down-Regulated
ACSM3	-1.72024	4.19756	-4.94949	9.7097e-07	1.48193e-05	4.73369	Down-Regulated
SETBP1	-1.33924	5.05704	-4.94739	9.81076e-07	1.49546e-05	4.72375	Down-Regulated
FBXO21	-1.63799	8.58962	-4.9419	1.00798e-06	1.53453e-05	4.69778	Down-Regulated
TCEAL1	-1.46114	7.38629	-4.91902	1.12802e-06	1.70007e-05	4.58981	Down-Regulated
ATP10B	-1.90263	4.56622	-4.89135	1.29165e-06	1.91788e-05	4.45987	Down-Regulated
AGT	-1.32201	3.81656	-4.88417	1.33775e-06	1.96715e-05	4.42623	Down-Regulated
PDLIM1	-1.44988	8.98905	-4.87447	1.40246e-06	2.04708e-05	4.38094	Down-Regulated
SNCAIP	-1.61666	4.6676	-4.85659	1.52988e-06	2.21961e-05	4.29756	Down-Regulated
ACSL5	-1.8951	5.80125	-4.85169	1.56671e-06	2.26548e-05	4.27476	Down-Regulated
MGLL	-2.13542	5.81487	-4.84724	1.60087e-06	2.30319e-05	4.25408	Down-Regulated
MAST4	-1.30689	5.55673	-4.84375	1.62813e-06	2.33709e-05	4.2379	Down-Regulated
PLA2G4A	-2.44155	4.8582	-4.84373	1.62831e-06	2.33709e-05	4.23779	Down-Regulated
SLC46A3	-1.57271	5.52832	-4.8175	1.84835e-06	2.63406e-05	4.11633	Down-Regulated
HOXB6	-2.76835	5.09589	-4.80954	1.9206e-06	2.72734e-05	4.0796	Down-Regulated
CIB1	-1.21179	8.10637	-4.78833	2.12663e-06	2.98124e-05	3.982	Down-Regulated
LMBRD1	-1.25115	8.57033	-4.78345	2.17702e-06	3.03639e-05	3.95957	Down-Regulated
JAM2	-1.44655	4.79457	-4.76431	2.38569e-06	3.28068e-05	3.87193	Down-Regulated
DNMBP	-1.37259	5.43949	-4.74436	2.62375e-06	3.55802e-05	3.78089	Down-Regulated
PPP1R7	-1.00109	7.24225	-4.74316	2.63873e-06	3.5743e-05	3.77544	Down-Regulated
CALCOCO2	-1.15874	7.19884	-4.73281	2.7718e-06	3.7128e-05	3.72836	Down-Regulated
OLFM4	-1.72391	3.17554	-4.7303	2.80499e-06	3.75308e-05	3.71697	Down-Regulated
TGM2	-1.10106	4.77557	-4.72485	2.87846e-06	3.83433e-05	3.69224	Down-Regulated
ASTN1	-1.28823	3.59919	-4.71901	2.95923e-06	3.9289e-05	3.66576	Down-Regulated
PLA1A	-1.54443	3.55996	-4.71464	3.0211e-06	3.98904e-05	3.64597	Down-Regulated
TIPARP	-1.24884	7.32972	-4.71133	3.06886e-06	4.04323e-05	3.63097	Down-Regulated
STX8	-1.12849	7.07152	-4.69925	3.24915e-06	4.24363e-05	3.57636	Down-Regulated
RRAD	-1.36439	3.79357	-4.69289	3.34807e-06	4.36809e-05	3.54769	Down-Regulated
ACTA2	-2.30417	8.97863	-4.6895	3.40206e-06	4.41938e-05	3.53239	Down-Regulated
CCRL1	-1.12075	3.42225	-4.68559	3.46527e-06	4.48696e-05	3.51479	Down-Regulated
LITAF	-1.37701	7.93729	-4.6507	4.08172e-06	5.19205e-05	3.35828	Down-Regulated
AKR1C3	-2.59586	5.78519	-4.64241	4.24294e-06	5.3726e-05	3.32127	Down-Regulated
STX18	-1.47229	7.06876	-4.64033	4.28445e-06	5.41378e-05	3.31197	Down-Regulated
NDP	-2.59203	4.57984	-4.6236	4.63195e-06	5.8004e-05	3.23746	Down-Regulated
FOXO1	-1.37264	6.16544	-4.62124	4.68301e-06	5.84988e-05	3.22699	Down-Regulated
CASC1	-1.99301	4.22185	-4.59895	5.1938e-06	6.41475e-05	3.12813	Down-Regulated
CAT	-1.18807	8.13701	-4.59584	5.2692e-06	6.49455e-05	3.11437	Down-Regulated
LRRC6	-1.52984	5.18188	-4.59093	5.3903e-06	6.61672e-05	3.09268	Down-Regulated
TMEM47	-2.13031	6.11684	-4.5854	5.52985e-06	6.76269e-05	3.06828	Down-Regulated
MOSPD1	-1.40891	6.62629	-4.57581	5.78028e-06	7.01675e-05	3.026	Down-Regulated
AOX1	-1.02893	3.68357	-4.57	5.93729e-06	7.19284e-05	3.00043	Down-Regulated
ECM2	-1.69733	4.61835	-4.55666	6.3133e-06	7.56466e-05	2.94183	Down-Regulated
C11orf75	-1.60254	6.69849	-4.53811	6.87422e-06	8.18787e-05	2.86063	Down-Regulated
TSPAN8	-3.02892	4.99014	-4.52923	7.15952e-06	8.50246e-05	2.82185	Down-Regulated
CEL	-1.7197	3.80128	-4.50756	7.90376e-06	9.24049e-05	2.72756	Down-Regulated
RASGRP1	-1.6341	4.96972	-4.49092	8.52517e-06	9.91639e-05	2.65542	Down-Regulated
FAM13A1	-1.25687	6.08192	-4.47387	9.20996e-06	0.000105726	2.5818	Down-Regulated
IRS1	-1.60964	5.31318	-4.46433	9.61611e-06	0.000109478	2.54069	Down-Regulated
FHL1	-1.58435	5.16818	-4.45351	1.00974e-05	0.000114819	2.49417	Down-Regulated
NME7	-1.40434	7.26784	-4.44991	1.02625e-05	0.000116586	2.47873	Down-Regulated
FMO2	-2.0802	4.60707	-4.4325	1.10985e-05	0.000125022	2.40416	Down-Regulated
LTA4H	-1.02704	9.28118	-4.42365	1.1548e-05	0.000129359	2.36637	Down-Regulated
FYN	-1.66055	6.31373	-4.42286	1.15889e-05	0.000129696	2.36301	Down-Regulated
LXN	-1.53761	7.18441	-4.41937	1.17713e-05	0.000130766	2.34814	Down-Regulated
UBL3	-1.00508	6.85838	-4.39401	1.31838e-05	0.000144721	2.24031	Down-Regulated
RRAGA	-1.00786	8.62195	-4.38793	1.35454e-05	0.000147882	2.21457	Down-Regulated
WDR19	-1.26819	6.06212	-4.38703	1.36004e-05	0.000148213	2.21072	Down-Regulated
SORL1	-1.5021	8.14851	-4.38056	1.39973e-05	0.000151786	2.18336	Down-Regulated
CTSO	-1.44135	6.59654	-4.38019	1.40201e-05	0.000151826	2.18181	Down-Regulated
CST6	-1.76414	4.75999	-4.37772	1.41752e-05	0.000153229	2.17135	Down-Regulated
CEACAM5	-1.04821	3.23959	-4.36859	1.47615e-05	0.000157867	2.13281	Down-Regulated
CX3CR1	-2.10788	5.76966	-4.3664	1.49055e-05	0.000159124	2.12358	Down-Regulated
TRIM68	-1.1092	5.13237	-4.36065	1.52901e-05	0.000162653	2.09936	Down-Regulated
RAMP1	-1.44255	5.04877	-4.34055	1.67102e-05	0.000175589	2.01494	Down-Regulated
BDH2	-1.10967	7.07997	-4.32285	1.80643e-05	0.000188012	1.9409	Down-Regulated
MITF	-1.01898	5.28297	-4.30778	1.92995e-05	0.000198637	1.87808	Down-Regulated
CAV1	-1.72486	7.08597	-4.30664	1.93965e-05	0.000199464	1.87332	Down-Regulated
VEGFC	-1.4423	4.88363	-4.30575	1.94719e-05	0.000199728	1.86963	Down-Regulated
PTPRM	-1.53212	6.47924	-4.30531	1.95098e-05	0.000199946	1.86779	Down-Regulated
NDN	-2.02836	5.86643	-4.30397	1.96241e-05	0.000200947	1.86224	Down-Regulated
CTSH	-1.26716	8.04549	-4.29002	2.08585e-05	0.000210367	1.80432	Down-Regulated
GSTA1	-1.93812	4.27693	-4.28976	2.08824e-05	0.000210432	1.80323	Down-Regulated
CNDP2	-1.05153	8.72343	-4.27378	2.23886e-05	0.000223738	1.73712	Down-Regulated
GNG12	-1.10647	7.77347	-4.27203	2.25598e-05	0.000224888	1.72989	Down-Regulated
GYPC	-1.45015	6.06121	-4.27027	2.27335e-05	0.000226245	1.72262	Down-Regulated
PLCB4	-1.41355	4.71403	-4.26911	2.28485e-05	0.000227015	1.71782	Down-Regulated
KIAA0423	-1.10099	6.0058	-4.26201	2.35646e-05	0.000232976	1.68854	Down-Regulated
RBKS	-1.11715	6.15726	-4.25582	2.42064e-05	0.000238929	1.66305	Down-Regulated
MYO5C	-1.36992	7.51951	-4.24787	2.50549e-05	0.000245893	1.63037	Down-Regulated
DMBT1	-2.07214	4.66027	-4.24591	2.52685e-05	0.000247294	1.62232	Down-Regulated
IQCG	-1.89282	5.95561	-4.21768	2.85425e-05	0.000274528	1.50679	Down-Regulated
PPAP2A	-1.16902	6.11327	-4.21498	2.88758e-05	0.000276849	1.49578	Down-Regulated
BNC2	-1.50701	5.43002	-4.20396	3.02755e-05	0.000287976	1.45092	Down-Regulated
CRYL1	-1.24402	5.05802	-4.19777	3.10899e-05	0.000293635	1.42577	Down-Regulated
CYB5R1	-1.17667	7.47655	-4.19188	3.18844e-05	0.000299811	1.40186	Down-Regulated
CLDN10	-3.0061	6.83515	-4.17668	3.40249e-05	0.000316392	1.34031	Down-Regulated
DHRS7B	-1.03375	6.08779	-4.16281	3.60974e-05	0.000333348	1.28431	Down-Regulated
PH-4	-1.05435	7.43968	-4.15899	3.66884e-05	0.000338027	1.26894	Down-Regulated
ASRGL1	-2.01334	8.47419	-4.15603	3.7153e-05	0.000342046	1.25703	Down-Regulated
SLCO2A1	-1.19769	4.90205	-4.1539	3.74921e-05	0.000343842	1.24842	Down-Regulated
STC1	-1.45505	4.63498	-4.14722	3.857e-05	0.000351597	1.22159	Down-Regulated
RRAS	-1.20853	6.65136	-4.14169	3.94853e-05	0.000358583	1.1994	Down-Regulated
RPS6KA2	-1.04573	5.34682	-4.13794	4.01165e-05	0.000363494	1.18439	Down-Regulated
EPS8	-1.58613	6.83659	-4.13195	4.11471e-05	0.000370878	1.16038	Down-Regulated
RAGE	-1.14748	5.28447	-4.11944	4.33806e-05	0.000389842	1.11038	Down-Regulated
SCARA3	-1.24051	5.56625	-4.1121	4.47432e-05	0.000399405	1.08112	Down-Regulated
TMEM16A	-1.99475	4.23658	-4.11127	4.48999e-05	0.000400507	1.07782	Down-Regulated
ZFPM2	-2.02183	5.38422	-4.11005	4.51307e-05	0.00040197	1.07297	Down-Regulated
CLU	-1.98493	8.99726	-4.10827	4.54706e-05	0.0004044	1.06587	Down-Regulated
GEM	-1.52586	4.89691	-4.09357	4.83686e-05	0.000426587	1.00745	Down-Regulated
CMTM6	-1.00959	10.5017	-4.08858	4.93904e-05	0.000433498	0.987692	Down-Regulated
PTPN3	-1.00331	5.29303	-4.08212	5.07441e-05	0.000443119	0.962135	Down-Regulated
RHOB	-1.40034	6.9778	-4.06952	5.34904e-05	0.000465413	0.912328	Down-Regulated
PAEP	-2.19993	4.19955	-4.048	5.85066e-05	0.000498369	0.827656	Down-Regulated
DCN	-2.28212	8.21368	-4.02513	6.43255e-05	0.000540173	0.738139	Down-Regulated
PENK	-1.26383	3.7446	-4.02287	6.49287e-05	0.000544479	0.72933	Down-Regulated
SLC44A4	-1.88256	5.64127	-4.02099	6.54344e-05	0.000547957	0.722007	Down-Regulated
CUGBP2	-1.2442	5.20557	-3.99195	7.375e-05	0.000605351	0.609142	Down-Regulated
GULP1	-1.4913	5.19933	-3.9873	7.51733e-05	0.00061497	0.591116	Down-Regulated
NUCB2	-1.27029	7.4588	-3.98034	7.73485e-05	0.000630196	0.564219	Down-Regulated
NCALD	-1.52578	5.86571	-3.97732	7.83097e-05	0.000636306	0.552575	Down-Regulated
PHF11	-1.01054	7.91068	-3.97675	7.84937e-05	0.000637371	0.550363	Down-Regulated
KCNMA1	-1.19556	5.21417	-3.97332	7.9604e-05	0.000645081	0.537122	Down-Regulated
OSBPL1A	-1.09503	6.93385	-3.96861	8.11522e-05	0.000655347	0.518964	Down-Regulated
RBP1	-1.70972	8.69295	-3.95439	8.59979e-05	0.000689013	0.464309	Down-Regulated
HRH1	-1.29376	5.04785	-3.92651	9.6311e-05	0.000755555	0.35763	Down-Regulated
CECR1	-1.54886	7.22669	-3.92389	9.73389e-05	0.00076114	0.347634	Down-Regulated
HAMP	-1.00759	3.90391	-3.92195	9.81042e-05	0.000766626	0.340262	Down-Regulated
MFAP4	-1.44878	4.35575	-3.91765	9.98273e-05	0.00077908	0.323871	Down-Regulated
TGFBR3	-1.47666	6.91774	-3.91109	0.000102508	0.000796902	0.298928	Down-Regulated
FAM107A	-1.99356	5.95483	-3.90411	0.000105432	0.000815945	0.27246	Down-Regulated
LHFP	-1.31485	5.02593	-3.90254	0.0001061	0.000819539	0.266512	Down-Regulated
ARL4A	-1.12887	6.43577	-3.89939	0.000107456	0.000826827	0.254566	Down-Regulated
ST5	-1.0073	6.78941	-3.89581	0.000109015	0.000838288	0.241014	Down-Regulated
CYP1B1	-1.61263	5.39044	-3.89354	0.000110016	0.000845015	0.232412	Down-Regulated
SRPX	-1.84525	5.49374	-3.89351	0.00011003	0.000845015	0.232293	Down-Regulated
PAX2	-1.25945	4.00802	-3.89124	0.000111039	0.000852217	0.22371	Down-Regulated
ANXA4	-1.11526	8.66541	-3.88416	0.000114239	0.000871777	0.196984	Down-Regulated
CHPT1	-1.37971	6.75158	-3.87853	0.000116847	0.000887744	0.175752	Down-Regulated
GIMAP6	-1.17025	4.86688	-3.86848	0.000121648	0.000916123	0.137897	Down-Regulated
PNPLA4	-1.03705	5.61221	-3.86803	0.000121864	0.000916607	0.136224	Down-Regulated
LIPA	-1.35915	8.50629	-3.86115	0.000125258	0.000938618	0.110401	Down-Regulated
FAS	-1.13503	5.1734	-3.84697	0.000132547	0.000983442	0.0572497	Down-Regulated
RPGR	-1.22732	4.95914	-3.82209	0.000146304	0.00106453	-0.0355058	Down-Regulated
CDO1	-1.32258	4.06862	-3.80511	0.000156453	0.0011268	-0.0984696	Down-Regulated
RGL1	-1.19091	7.44599	-3.80098	0.000159019	0.00114323	-0.113737	Down-Regulated
CADPS2	-1.38659	5.10655	-3.75268	0.000192157	0.001336	-0.291248	Down-Regulated
RGS2	-1.81611	6.79057	-3.74749	0.000196077	0.00135855	-0.310176	Down-Regulated
REG1A	-1.62242	3.62204	-3.73484	0.000205962	0.00141241	-0.356253	Down-Regulated
OLFML1	-1.15059	4.55631	-3.7268	0.000212482	0.00145216	-0.385439	Down-Regulated
PART1	-1.32371	5.00868	-3.71388	0.000223375	0.00151542	-0.432248	Down-Regulated
TXNIP	-1.23567	9.2011	-3.69159	0.000243411	0.00162571	-0.512635	Down-Regulated
CD44	-1.16766	5.39205	-3.68663	0.000248092	0.00165148	-0.530452	Down-Regulated
NR3C2	-1.07213	4.48001	-3.67561	0.000258799	0.00171046	-0.569966	Down-Regulated
PMP22	-1.43816	7.01583	-3.67422	0.000260174	0.0017186	-0.574919	Down-Regulated
DNALI1	-1.49523	5.20168	-3.65779	0.000277032	0.00181207	-0.633605	Down-Regulated
PITPNC1	-1.37663	6.35628	-3.61151	0.000330199	0.00208072	-0.797556	Down-Regulated
EPB41L4B	-1.23763	7.15391	-3.59593	0.000350162	0.00218366	-0.852321	Down-Regulated
CXCL2	-2.18792	5.51618	-3.58849	0.000360085	0.00223397	-0.878381	Down-Regulated
STAP2	-1.20654	5.5887	-3.57914	0.000372929	0.00230534	-0.911059	Down-Regulated
FBLN5	-1.34269	5.84366	-3.56219	0.000397309	0.00243357	-0.970077	Down-Regulated
RBPMS	-1.01275	5.20564	-3.54813	0.00041867	0.00253443	-1.01886	Down-Regulated
AQP9	-1.50921	5.16298	-3.53877	0.00043348	0.00261521	-1.05123	Down-Regulated
DAB2	-1.24526	5.97971	-3.51809	0.00046794	0.00278268	-1.12242	Down-Regulated
ZFP36	-1.40069	7.58136	-3.49249	0.000514154	0.00300994	-1.21	Down-Regulated
CLN5	-1.09115	6.41111	-3.48561	0.000527296	0.0030779	-1.23346	Down-Regulated
HOXC4	-1.35303	6.23177	-3.48459	0.000529261	0.00308638	-1.23692	Down-Regulated
SQRDL	-1.5047	7.70698	-3.48415	0.000530127	0.00308993	-1.23843	Down-Regulated
CRYZ	-1.15969	7.45532	-3.48192	0.000534471	0.00311374	-1.24602	Down-Regulated
TGFB1I1	-1.24225	6.04559	-3.46445	0.000569669	0.00329085	-1.30526	Down-Regulated
CRTAC1	-1.67711	5.65745	-3.45353	0.000592754	0.00340388	-1.34214	Down-Regulated
C1orf115	-1.04031	6.06683	-3.44966	0.000601148	0.00343896	-1.35519	Down-Regulated
ZBTB20	-1.08534	6.07475	-3.43822	0.000626605	0.0035626	-1.39368	Down-Regulated
AQP3	-1.08902	5.15313	-3.43688	0.000629662	0.0035766	-1.3982	Down-Regulated
SKAP1	-1.08687	5.19884	-3.42114	0.000666495	0.00373423	-1.45092	Down-Regulated
ERLIN2	-1.02716	5.92763	-3.39734	0.000726031	0.0040185	-1.53022	Down-Regulated
SERPINF1	-1.94589	7.14585	-3.39224	0.000739407	0.00408437	-1.54713	Down-Regulated
PTPRK	-1.00474	8.15574	-3.36575	0.000812701	0.00441631	-1.63463	Down-Regulated
MAN1C1	-1.0106	4.70668	-3.32811	0.000928519	0.00491407	-1.75781	Down-Regulated
ID3	-1.18329	5.76567	-3.32689	0.000932542	0.00492098	-1.76181	Down-Regulated
SCGB1D2	-2.39067	7.52134	-3.32061	0.000953382	0.00499996	-1.78222	Down-Regulated
ITFG1	-1.05142	7.75121	-3.30936	0.000991784	0.00517463	-1.81869	Down-Regulated
RAB11FIP1	-1.13048	5.49297	-3.2764	0.00111275	0.00570688	-1.92488	Down-Regulated
PROS1	-1.36592	5.99822	-3.27095	0.00113404	0.00579138	-1.94235	Down-Regulated
APOC2	-1.01304	5.01363	-3.26071	0.00117506	0.00598312	-1.9751	Down-Regulated
LTF	-2.05111	4.93961	-3.24189	0.00125402	0.00628941	-2.03501	Down-Regulated
LZTFL1	-1.01037	6.33692	-3.24141	0.00125609	0.00629456	-2.03653	Down-Regulated
AMT	-1.15459	5.23575	-3.21955	0.0013541	0.00668831	-2.10567	Down-Regulated
NAT1	-1.08156	5.71481	-3.2031	0.00143242	0.00702045	-2.15738	Down-Regulated
DPYD	-1.55447	5.68224	-3.19826	0.00145631	0.00711724	-2.17258	Down-Regulated
PLSCR4	-1.12666	6.09573	-3.18291	0.00153434	0.00742523	-2.22054	Down-Regulated
IFITM2	-1.04593	9.86848	-3.17405	0.00158113	0.00761906	-2.24813	Down-Regulated
CHST1	-1.27036	5.25823	-3.17342	0.00158451	0.00763227	-2.25009	Down-Regulated
SCGB2A1	-2.18999	8.80392	-3.17017	0.00160208	0.00768639	-2.26021	Down-Regulated
HOXC6	-1.40119	5.48163	-3.1683	0.0016122	0.00772824	-2.26599	Down-Regulated
PDGFC	-1.00388	8.89672	-3.1682	0.00161278	0.00772824	-2.26632	Down-Regulated
PODXL	-1.18676	7.92549	-3.15638	0.00167843	0.00798566	-2.30294	Down-Regulated
FER1L3	-1.11174	8.01705	-3.14519	0.00174286	0.00822715	-2.33748	Down-Regulated
PFKFB3	-1.0626	6.92463	-3.09442	0.00206485	0.00945342	-2.49275	Down-Regulated
PDGFRL	-1.28547	6.22359	-3.06874	0.00224777	0.0100811	-2.57036	Down-Regulated
RELN	-1.20342	4.26276	-3.06293	0.00229121	0.0102416	-2.58785	Down-Regulated
GHR	-1.02978	3.93941	-3.06241	0.00229513	0.0102515	-2.58941	Down-Regulated
EPHX1	-1.10128	7.81956	-3.0622	0.00229672	0.0102548	-2.59004	Down-Regulated
SERPINB1	-1.18133	6.85383	-3.05983	0.00231463	0.0103194	-2.59714	Down-Regulated
CCND2	-1.22724	4.75929	-3.04736	0.00241129	0.0106557	-2.63449	Down-Regulated
VNN1	-1.2427	4.18561	-3.04586	0.00242317	0.0106925	-2.63898	Down-Regulated
PLLP	-1.05917	5.90763	-3.01452	0.00268384	0.0116088	-2.73216	Down-Regulated
MYB	-1.16901	5.33126	-3.01292	0.00269783	0.0116442	-2.7369	Down-Regulated
KCTD12	-1.11267	8.89557	-2.98738	0.00293012	0.0124197	-2.81212	Down-Regulated
HRASLS3	-1.12816	7.00933	-2.98239	0.00297752	0.0125896	-2.82672	Down-Regulated
HLA-DMA	-1.56061	7.87337	-2.93674	0.00344545	0.014209	-2.95938	Down-Regulated
ST6GALNAC2	-1.43153	6.97585	-2.92677	0.00355622	0.0145633	-2.98809	Down-Regulated
KCNJ16	-1.41969	4.14396	-2.92543	0.00357135	0.0145981	-2.99194	Down-Regulated
HSPA2	-1.16212	6.12275	-2.89384	0.00394546	0.0157897	-3.08224	Down-Regulated
NLGN4X	-1.21267	4.84883	-2.88492	0.00405738	0.0161571	-3.10757	Down-Regulated
C7	-1.73714	5.8143	-2.87932	0.00412908	0.016383	-3.12342	Down-Regulated
ISYNA1	-1.02089	7.58752	-2.87415	0.00419637	0.0165844	-3.13805	Down-Regulated
ASPN	-1.72782	4.85331	-2.87254	0.00421749	0.016646	-3.14259	Down-Regulated
PROM1	-2.08488	5.72899	-2.85975	0.00438898	0.0171932	-3.17863	Down-Regulated
TUSC3	-1.24274	7.17945	-2.85653	0.00443314	0.0173268	-3.18768	Down-Regulated
XK	-1.05741	4.64587	-2.85489	0.00445575	0.0173982	-3.19227	Down-Regulated
ALOX5AP	-1.5924	6.84192	-2.81881	0.00498108	0.0190541	-3.29289	Down-Regulated
ALCAM	-1.24895	7.72048	-2.80565	0.00518625	0.0196331	-3.32927	Down-Regulated
PPAP2B	-1.10676	7.0913	-2.79026	0.00543592	0.0203796	-3.37162	Down-Regulated
GATA6	-1.56182	6.61966	-2.76384	0.00589002	0.0217236	-3.44379	Down-Regulated
ECM1	-1.00182	5.08561	-2.75199	0.00610459	0.0223575	-3.47595	Down-Regulated
FGL2	-1.00927	5.28788	-2.7367	0.00639192	0.0231912	-3.51724	Down-Regulated
HOXA4	-1.21171	4.58688	-2.72904	0.00654041	0.0236303	-3.53784	Down-Regulated
EFHD1	-1.15444	5.84562	-2.72842	0.00655255	0.0236457	-3.5395	Down-Regulated
TMC5	-1.01943	4.45373	-2.7027	0.00707482	0.0251017	-3.60823	Down-Regulated
GRAMD3	-1.00112	6.48518	-2.69115	0.00732137	0.0258925	-3.63889	Down-Regulated
ATF3	-1.34918	7.11483	-2.68566	0.00744132	0.0262319	-3.65343	Down-Regulated
PTGDS	-1.84421	7.71185	-2.68032	0.00755952	0.0265321	-3.66752	Down-Regulated
CAMK2N1	-1.43652	5.43086	-2.66486	0.0079118	0.0275119	-3.70823	Down-Regulated
FAM129A	-1.18002	5.3759	-2.62077	0.00899795	0.0304409	-3.82296	Down-Regulated
ID1	-1.45182	5.95065	-2.61625	0.00911652	0.030742	-3.83462	Down-Regulated
FOS	-1.40283	7.67321	-2.58087	0.0100941	0.0333572	-3.92519	Down-Regulated
CA12	-1.05156	5.0512	-2.57951	0.0101336	0.033451	-3.92866	Down-Regulated
TAGLN	-1.47671	8.06531	-2.57433	0.0102849	0.0338323	-3.94181	Down-Regulated
RARRES3	-1.32535	7.069	-2.53785	0.0114084	0.0367819	-4.03372	Down-Regulated
HLA-DPB1	-1.26837	8.61332	-2.53412	0.0115291	0.0370321	-4.04303	Down-Regulated
DHRS3	-1.00995	7.69614	-2.52392	0.0118654	0.0378333	-4.06847	Down-Regulated
LRRC17	-1.26649	5.04576	-2.52281	0.0119026	0.0379183	-4.07124	Down-Regulated
MYC	-1.05407	8.04822	-2.51867	0.0120417	0.0382423	-4.08151	Down-Regulated
GUCY1B3	-1.12566	6.17016	-2.51313	0.0122307	0.0387228	-4.09527	Down-Regulated
CRISPLD2	-1.24517	5.83017	-2.51029	0.0123283	0.0389532	-4.10229	Down-Regulated
CTGF	-1.20943	7.32099	-2.45415	0.0144081	0.0440027	-4.23971	Down-Regulated
MEIS2	-1.27041	6.35915	-2.42131	0.0157637	0.0471502	-4.3187	Down-Regulated

## Sheet: GSE18520 DEGs
The differential expressed genes in ovarian cancer samples compared with normal according to GSE18520 data.
ID	Gene.symbol	adj.P.Val	P.Value	t	B	logFC
205969_at	AADAC	0.000105	1.39e-05	-4.69918	2.3249	-1.73053
240420_at	AADACL2	4.83e-21	1.45e-23	-15.5024	43.3134	-3.35435
218089_at	AAR2	2.65e-05	2.89e-06	5.1215	3.85221	1.1577
214829_at	AASS	1.62e-09	6.64e-11	-7.79275	14.3723	-2.30455
205986_at	AATK	0.000848	0.000153	4.01969	0.011698	1.14881
206527_at	ABAT	7.71e-07	5.68e-08	6.13079	7.70244	1.23614
210099_at	ABCA2	1.01e-15	1.03e-17	-11.7227	29.9472	-1.11976
213353_at	ABCA5	2.98e-18	1.72e-20	-13.4538	36.2997	-2.76769
204719_at	ABCA8	2.35e-25	2.36e-28	-19.0429	54.1864	-5.06993
1565780_at	ABCA8	1.16e-09	4.6e-11	-7.88228	14.736	-1.90852
235335_at	ABCA9	3.25e-09	1.42e-10	-7.60651	13.616	-1.36816
239185_at	ABCA9	6.19e-13	1.18e-14	-9.91702	22.942	-1.26502
243951_at	ABCB1	2.47e-19	1.1e-21	-14.2299	39.0214	-3.48368
209993_at	ABCB1	2.37e-11	6.34e-13	-8.93032	18.9874	-2.10327
203981_s_at	ABCD4	1.75e-05	1.83e-06	-5.24176	4.29757	-1.28846
200045_at	ABCF1	1.88e-06	1.52e-07	5.8822	6.73316	1.19494
1560117_at	ABHD1	1.45e-05	1.48e-06	5.2984	4.50879	1.62681
222697_s_at	ABHD10	1.14e-05	1.12e-06	-5.36946	4.77504	-1.09375
1552800_at	ABHD11	1.89e-13	3.19e-15	-10.2465	24.2455	-1.7447
221927_s_at	ABHD11	4.05e-07	2.81e-08	6.30679	8.3951	1.1961
228124_at	ABHD12	0.00051	8.47e-05	4.19271	0.58159	1.11768
228123_s_at	ABHD12	2.05e-10	6.87e-12	8.34634	16.6215	1.60787
225436_at	ABHD17C	5.3e-07	3.77e-08	6.23354	8.10624	1.48774
221815_at	ABHD2	0.0031	0.000712	3.55344	-1.44893	1.03983
213017_at	ABHD3	5.86e-07	4.2e-08	-6.20673	8.00071	-1.31855
216113_at	ABI2	0.000488	8.07e-05	-4.20688	0.628863	-1.08437
231075_x_at	ABI2	6.5e-07	4.71e-08	-6.17784	7.88713	-1.00807
223395_at	ABI3BP	1.18e-11	2.97e-13	-9.1167	19.7393	-3.34504
220518_at	ABI3BP	2.13e-10	7.21e-12	-8.33448	16.5733	-1.45329
212895_s_at	ABR	0.000219	3.2e-05	-4.46924	1.52036	-1.02369
202003_s_at	ACAA2	0.000773	0.000137	-4.05263	0.119094	-1.35869
49452_at	ACACB	3.08e-05	3.44e-06	-5.07579	3.68408	-1.22612
1552615_at	ACACB	0.00228	0.000493	3.66815	-1.10037	1.03117
1552616_a_at	ACACB	5.16e-08	2.92e-09	6.86758	10.63	2.2984
212477_at	ACAP2	0.000681	0.000119	4.09486	0.257536	1.05713
1559239_s_at	ACAT1	2.37e-15	2.61e-17	-11.4789	29.0224	-1.2667
1554947_at	ACAT1	3.72e-07	2.56e-08	-6.32972	8.48571	-1.0416
222257_s_at	ACE2	0.0249	0.00916	2.68596	-3.82243	1.33591
232746_at	ACKR3	0.000108	1.43e-05	-4.6921	2.29985	-1.35268
1559114_a_at	ACKR3	0.000821	0.000148	-4.0313	0.049499	-1.02469
216103_at	ACOT11	1.67e-14	2.29e-16	-10.9171	26.8651	-1.64741
236514_at	ACOT8	5.31e-05	6.36e-06	4.91154	3.0854	1.17208
1554808_at	ACP1	1.55e-14	2.1e-16	-10.9386	26.9485	-1.22029
215227_x_at	ACP1	0.00266	0.000595	3.60962	-1.27914	1.18604
241715_x_at	ACPT	0.000651	0.000113	4.11037	0.308612	1.11881
1557419_a_at	ACSL4	1.05e-23	1.63e-26	-17.6273	50.0203	-1.97511
244723_at	ACSM2A	6.94e-07	5.06e-08	6.16002	7.81713	1.62174
241915_at	ACSM2B	0.000289	4.42e-05	4.37828	1.20795	1.20582
89977_at	ACSM5	1.81e-14	2.5e-16	10.894	26.7758	3.41169
224882_at	ACSS1	1.52e-21	4.05e-24	15.8892	44.5762	1.50585
229222_at	ACSS3	0.000344	5.39e-05	-4.32207	1.01662	-1.459
AFFX-HSAC07/X00351_5_at	ACTB	2.85e-07	1.91e-08	-6.40362	8.7782	-1.09163
1565911_at	ACTG1P17	1.41e-05	1.44e-06	-5.30563	4.53579	-1.4196
206013_s_at	ACTL6B	5.68e-07	4.06e-08	-6.21478	8.03235	-1.29562
211160_x_at	ACTN1	0.0051	0.0013	3.36224	-2.0131	1.06148
203864_s_at	ACTN2	0.0157	0.00517	2.89396	-3.29881	1.03841
208218_s_at	ACVR1B	3.01e-18	1.74e-20	-13.4506	36.2884	-1.32505
205209_at	ACVR1B	1.53e-05	1.57e-06	5.28279	4.45048	1.14451
1559548_at	ACVR2B	1.65e-11	4.28e-13	-9.02678	19.3767	-1.6049
215590_x_at	ACVR2B-AS1	0.0159	0.00526	2.88745	-3.31566	1.25449
210838_s_at	ACVRL1	4.59e-18	2.73e-20	13.3249	35.84	1.55496
238424_at	ADAL	1.07e-06	8.23e-08	6.03776	7.33836	1.75617
207665_at	ADAM21	0.0207	0.00727	2.77098	-3.6121	1.26572
208226_x_at	ADAM22	5.46e-14	8.3e-16	-10.5876	25.5839	-1.46171
211239_s_at	ADAM7	2.17e-08	1.14e-09	-7.09802	11.5576	-1.4599
226311_at	ADAMTS2	0.00302	0.000689	3.56406	-1.41697	1.68403
214913_at	ADAMTS3	1.11e-08	5.53e-10	-7.27535	12.274	-2.5671
241369_at	ADAMTS9-AS1	2.7e-18	1.54e-20	-13.484	36.407	-2.04481
1556364_at	ADAMTS9-AS2	4.9e-09	2.25e-10	-7.49488	13.1632	-1.27802
221893_s_at	ADCK2	0.000239	3.55e-05	4.44028	1.42051	1.7105
215340_at	ADCY1	0.002	0.000423	3.7153	-0.954988	1.36262
228182_at	ADCY5	3.01e-08	1.63e-09	7.01097	11.2067	1.79412
204497_at	ADCY9	0.00335	0.00078	-3.52467	-1.5352	-1.02173
230237_at	ADCYAP1	1.43e-14	1.92e-16	-10.9625	27.0408	-1.80973
206281_at	ADCYAP1	8.06e-13	1.57e-14	-9.84593	22.6595	-1.1903
226690_at	ADCYAP1R1	5.78e-05	7e-06	4.88574	2.99215	1.27706
238939_at	ADD1	1.49e-11	3.81e-13	-9.05538	19.4921	-1.53564
237336_at	ADD2	7.75e-07	5.72e-08	-6.12941	7.69703	-1.2251
65718_at	ADGRA2	5.63e-23	1.08e-25	-17.0183	48.1551	-3.00898
221814_at	ADGRA2	0.0116	0.00355	3.02521	-2.95291	1.14003
232267_at	ADGRD1	1.98e-14	2.75e-16	-10.8695	26.6808	-4.45516
236489_at	ADGRF1	0.0004	6.41e-05	4.2726	0.84936	1.61375
237690_at	ADGRF4	1.4e-09	5.64e-11	-7.83238	14.5333	-3.80475
1553031_at	ADGRF4	0.006	0.00159	3.29658	-2.2018	1.07344
212951_at	ADGRF5	0.00363	0.00086	3.49412	-1.62626	1.04584
212070_at	ADGRG1	5.49e-10	2.02e-11	8.08313	15.5522	1.87364
1553006_at	ADGRG4	1.01e-11	2.49e-13	-9.16012	19.9141	-1.52113
1555447_at	ADGRG5	0.000281	4.27e-05	4.38805	1.24132	1.27954
213094_at	ADGRG6	0.0238	0.00867	-2.70625	-3.7727	-1.26639
47560_at	ADGRL1	0.000171	2.42e-05	4.54718	1.79073	1.02649
224275_at	ADGRV1	7.51e-08	4.41e-09	6.76593	10.2223	1.48566
209613_s_at	ADH1B	1.54e-17	1.02e-19	-12.9616	34.5327	-5.76896
209612_s_at	ADH1B	3.6e-12	8.13e-14	-9.43696	21.0265	-3.18507
206262_at	ADH1C	1.15e-16	9.55e-19	-12.3543	32.3091	-3.13962
231703_s_at	ADH4	7.06e-10	2.66e-11	-8.01575	15.2784	-1.13156
208848_at	ADH5	5.8e-06	5.3e-07	-5.56425	5.51163	-1.46513
207175_at	ADIPOQ	3.14e-20	1.13e-22	-14.8931	41.2845	-3.7333
203571_s_at	ADIRF	0.00181	0.000375	-3.75209	-0.84072	-1.22024
232300_at	ADIRF-AS1	0.000906	0.000166	3.9969	-0.062298	1.27227
204120_s_at	ADK	0.000778	0.000138	4.04996	0.110369	1.31806
1553163_at	ADPRHL1	7.08e-11	2.12e-12	8.63433	17.7897	2.20039
223401_at	ADPRM	6.46e-05	7.95e-06	-4.85143	2.86852	-1.21748
237390_at	ADRA1A	2.11e-08	1.11e-09	-7.10503	11.5859	-2.30158
206128_at	ADRA2C	7.7e-06	7.27e-07	5.48264	5.20183	1.55172
206812_at	ADRB3	0.00013	1.76e-05	4.63424	2.0956	2.26636
226955_at	AFAP1L1	4.37e-07	3.05e-08	-6.28683	8.31631	-1.29897
226829_at	AFAP1L2	0.00097	0.00018	3.9734	-0.138343	1.13465
216364_s_at	AFF2	0.00266	0.000595	3.61001	-1.27795	1.16257
206105_at	AFF2	4.24e-12	9.72e-14	9.39277	20.8492	2.42741
232865_at	AFF4	1.39e-10	4.45e-12	-8.45268	17.0531	-1.43929
219199_at	AFF4	3.5e-05	3.98e-06	5.03722	3.54273	1.0155
1552287_s_at	AFG3L1P	2.09e-06	1.71e-07	-5.85272	6.61898	-1.26257
204694_at	AFP	8.74e-07	6.55e-08	6.09506	7.56241	1.1947
217939_s_at	AFTPH	1.07e-13	1.71e-15	10.4041	24.8653	2.23715
242393_x_at	AGAP6	6.04e-08	3.46e-09	-6.82559	10.4615	-1.0614
243937_x_at	AGAP6	0.0176	0.00598	2.84195	-3.43259	1.26663
220390_at	AGBL2	0.000948	0.000175	-3.98111	-0.113424	-1.37978
206820_at	AGFG2	2.76e-05	3.05e-06	-5.10791	3.80216	-1.0384
221648_s_at	AGMAT	4.36e-06	3.86e-07	5.64517	5.82035	1.94853
32836_at	AGPAT1	3.06e-22	6.83e-25	16.4378	46.3353	2.73073
32837_at	AGPAT2	2.85e-06	2.42e-07	5.76493	6.28005	1.28589
228667_at	AGPAT4	3.42e-05	3.87e-06	-5.04442	3.56906	-1.1045
219693_at	AGPAT4	2.27e-07	1.48e-08	-6.46626	9.02671	-1.05645
217419_x_at	AGRN	8.22e-12	1.99e-13	-9.21564	20.1376	-1.95613
205357_s_at	AGTR1	1.3e-18	6.95e-21	-13.7072	37.1969	-2.61022
200903_s_at	AHCY	0.00989	0.00292	3.09229	-2.77168	1.02066
215672_s_at	AHCYL2	1.35e-07	8.45e-09	6.60527	9.58001	1.92402
244699_at	AHI1	3.29e-09	1.44e-10	-7.60329	13.6029	-1.39542
235281_x_at	AHNAK	0.0333	0.0132	2.54718	-4.15438	1.478
226334_s_at	AHSA2	1.81e-10	5.98e-12	-8.38035	16.7595	-1.68182
213095_x_at	AIF1	6.68e-06	6.2e-07	-5.52384	5.35801	-1.40387
209901_x_at	AIF1	0.0284	0.0109	2.6225	-3.97598	1.06787
207823_s_at	AIF1	0.00184	0.000382	3.74654	-0.857983	1.2551
223075_s_at	AIF1L	9.45e-11	2.9e-12	8.55746	17.4782	2.81702
1553734_at	AK7	0.0423	0.0179	2.4301	-4.42319	1.30442
1569700_s_at	AK7	1.85e-08	9.57e-10	7.14113	11.7316	2.6294
1569699_at	AK7	5.73e-13	1.08e-14	9.939	23.0292	3.54711
1557666_s_at	AK8	0.0212	0.0075	2.75955	-3.64069	1.22627
230976_at	AK8	7.42e-11	2.23e-12	8.62163	17.7383	2.25058
236007_at	AKAP10	4.83e-09	2.21e-10	-7.49882	13.1791	-1.63492
215336_at	AKAP11	3.87e-11	1.08e-12	-8.79844	18.4542	-1.32448
1555395_at	AKAP12	2.86e-16	2.6e-18	-12.0864	31.3133	-2.34513
227529_s_at	AKAP12	0.00107	0.000202	-3.93866	-0.250249	-1.50478
231067_s_at	AKAP12	0.000137	1.87e-05	-4.61859	2.04057	-1.41643
222023_at	AKAP13	4.24e-20	1.55e-22	-14.7993	40.9681	-2.62335
232188_at	AKAP13	0.000703	0.000123	-4.08435	0.223023	-1.08126
237282_s_at	AKAP14	2.25e-05	2.43e-06	-5.16741	4.02172	-2.51694
237281_at	AKAP14	0.00104	0.000195	-3.94869	-0.217991	-1.45608
230846_at	AKAP5	2.05e-09	8.58e-11	-7.73009	14.1178	-1.44736
205359_at	AKAP6	0.0158	0.0052	2.89185	-3.30428	1.2193
204151_x_at	AKR1C1	2.44e-07	1.6e-08	-6.44739	8.95179	-1.551
242876_at	AKT3	1.02e-11	2.53e-13	-9.1566	19.9	-2.80584
212607_at	AKT3	2.83e-09	1.23e-10	-7.64303	13.7642	-2.65394
212609_s_at	AKT3	5.15e-09	2.38e-10	-7.4811	13.1073	-1.60775
242879_x_at	AKT3	4.31e-07	3e-08	-6.29029	8.32997	-1.59913
218487_at	ALAD	8.53e-06	8.13e-07	-5.45348	5.09155	-1.03586
212224_at	ALDH1A1	2.98e-11	8.1e-13	-8.86988	18.7431	-2.92723
203180_at	ALDH1A3	2.48e-07	1.63e-08	-6.44217	8.93106	-1.47702
231202_at	ALDH1L2	0.000287	4.38e-05	4.38067	1.21611	1.82886
202054_s_at	ALDH3A2	9.07e-05	1.17e-05	-4.74592	2.4909	-1.14251
202053_s_at	ALDH3A2	4.23e-08	2.34e-09	6.92169	10.8474	1.72281
211004_s_at	ALDH3B1	9.45e-06	9.09e-07	-5.42464	4.9827	-1.06972
204942_s_at	ALDH3B2	1.09e-06	8.41e-08	6.03235	7.31723	2.16425
220148_at	ALDH8A1	3.17e-06	2.71e-07	-5.7355	6.16678	-1.28106
216600_x_at	ALDOB	4.33e-08	2.4e-09	6.91587	10.824	1.30408
205584_at	ALG13	1.41e-07	8.83e-09	-6.59437	9.53653	-1.17675
205583_s_at	ALG13	0.000415	6.69e-05	-4.26052	0.808697	-1.15276
228871_at	ALG14	0.00532	0.00137	3.34411	-2.06547	1.04711
208211_s_at	ALK	5.22e-20	1.96e-22	-14.7309	40.7363	-1.68291
228034_x_at	ALKBH5	3.18e-11	8.71e-13	-8.85215	18.6714	-1.60553
227878_s_at	ALKBH7	0.00509	0.00129	3.3628	-2.0115	1.13983
214340_at	ALOX12P2	1.51e-10	4.88e-12	8.42991	16.9607	1.40865
207328_at	ALOX15	8.37e-05	1.07e-05	-4.77058	2.57882	-1.23055
206714_at	ALOX15B	0.000492	8.14e-05	-4.20415	0.619743	-1.00995
207133_x_at	ALPK1	1.54e-20	5.32e-23	-15.1143	42.0266	-3.67097
215783_s_at	ALPL	6.16e-05	7.52e-06	-4.86644	2.92257	-1.54656
1557924_s_at	ALPL	6.16e-15	7.43e-17	-11.2069	27.9825	-1.2814
243276_at	ALS2CL	0.000397	6.35e-05	4.2755	0.859158	1.21514
229887_at	ALS2CL	3.54e-11	9.78e-13	8.82355	18.5558	1.32175
226319_s_at	ALYREF	0.0015	0.0003	3.81942	-0.629706	1.09847
229596_at	AMDHD1	2.79e-07	1.86e-08	-6.40984	8.80287	-1.36417
230496_at	AMER2	0.000186	2.65e-05	-4.52145	1.70121	-1.11904
222108_at	AMIGO2	0.00234	0.00051	-3.65758	-1.13279	-1.56804
205257_s_at	AMPH	0.000312	4.81e-05	4.35424	1.12592	1.01239
1561179_s_at	AMZ1	1.56e-17	1.03e-19	-12.9582	34.5202	-1.98029
223443_s_at	AMZ2P1	1e-06	7.67e-08	-6.05553	7.4078	-1.39059
232524_x_at	ANAPC4	1.27e-05	1.27e-06	-5.3372	4.654	-1.00951
235926_at	ANAPC5	1.13e-06	8.76e-08	-6.02209	7.2772	-1.28651
205141_at	ANG	1.12e-09	4.43e-11	-7.89153	14.7736	-1.77542
236034_at	ANGPT2	2.98e-05	3.31e-06	5.0857	3.72049	1.12685
231773_at	ANGPTL1	4.44e-05	5.19e-06	-4.96615	3.28348	-2.68582
224339_s_at	ANGPTL1	1.26e-09	5.03e-11	-7.86063	14.6481	-1.61975
213004_at	ANGPTL2	4.07e-08	2.24e-09	-6.93245	10.8907	-1.47941
220437_at	ANGPTL8	3.52e-08	1.92e-09	-6.97057	11.0441	-1.19124
240363_at	ANK1	3.14e-20	1.13e-22	-14.8917	41.28	-2.1149
1556653_at	ANKAR	3.58e-11	9.93e-13	-8.81987	18.5409	-1.59227
237316_at	ANKDD1A	0.0034	0.000796	3.51852	-1.55356	1.03037
1559640_at	ANKFN1	0.0155	0.00507	2.90055	-3.28173	1.01762
1560370_x_at	ANKH	5.17e-15	6.14e-17	11.2564	28.1723	6.12722
229457_at	ANKHD1	4.14e-23	7.58e-26	-17.1315	48.5052	-2.87832
226663_at	ANKRD10-IT1	2.01e-05	2.13e-06	-5.20198	4.14981	-1.36517
226012_at	ANKRD11	0.00179	0.00037	3.75605	-0.828371	1.26563
241233_x_at	ANKRD20A11P	0.0134	0.00423	2.96479	-3.11359	1.08055
239196_at	ANKRD22	6.43e-07	4.65e-08	-6.18094	7.89929	-1.33903
1561079_at	ANKRD28	8.18e-09	3.94e-10	-7.35819	12.6093	-1.31994
229308_at	ANKRD29	9.93e-15	1.27e-16	-11.068	27.4481	-2.50231
238464_at	ANKRD36	4.89e-15	5.75e-17	-11.2734	28.2378	-1.60843
220940_at	ANKRD36B	0.000218	3.19e-05	-4.46974	1.52208	-1.3937
228471_at	ANKRD44	6.32e-06	5.83e-07	-5.53968	5.41817	-1.58161
226641_at	ANKRD44	0.00253	0.000558	-3.6295	-1.21864	-1.19546
244453_at	ANKRD53	0.000604	0.000103	4.13544	0.391401	1.30563
1556182_x_at	ANKRD65	1.72e-15	1.83e-17	11.5712	29.3734	1.87374
227959_at	ANKRD9	1.75e-06	1.41e-07	-5.90134	6.80736	-1.3538
240292_x_at	ANKS1B	0.00013	1.76e-05	-4.63444	2.09631	-2.07397
226586_at	ANKS6	3.19e-07	2.16e-08	6.37233	8.65426	1.3835
222608_s_at	ANLN	0.00119	0.000229	3.90139	-0.36962	1.23068
218804_at	ANO1	0.0356	0.0144	2.51475	-4.22989	1.49383
229313_at	ANO5	3.36e-05	3.79e-06	-5.05013	3.58997	-1.60735
1563549_a_at	ANO8	0.00431	0.00106	3.42752	-1.82291	1.58204
205206_at	ANOS1	0.00211	0.000452	-3.6949	-1.01805	-1.68355
208103_s_at	ANP32E	2.93e-05	3.25e-06	5.09061	3.73852	1.40463
224694_at	ANTXR1	0.0129	0.00403	-2.98102	-3.07067	-1.20097
238050_at	ANTXR2	1.48e-22	3.04e-25	-16.691	47.1342	-2.46824
225524_at	ANTXR2	7.56e-09	3.61e-10	-7.37916	12.6942	-1.88197
228573_at	ANTXR2	0.000109	1.45e-05	-4.68862	2.28752	-1.02481
233011_at	ANXA1	3.05e-13	5.35e-15	-10.1164	23.7317	-2.32939
1568126_at	ANXA2	3.24e-09	1.42e-10	-7.6077	13.6208	-1.67988
209369_at	ANXA3	0.000458	7.49e-05	-4.22818	0.700128	-1.47041
201302_at	ANXA4	0.00482	0.00121	-3.38425	-1.94926	-1.02375
200982_s_at	ANXA6	0.00316	0.000729	3.54607	-1.47108	1.26094
244250_at	ANXA6	1.73e-10	5.68e-12	8.39294	16.8107	1.35763
211712_s_at	ANXA9	0.000113	1.5e-05	-4.6787	2.25244	-1.32576
203559_s_at	AOC1	0.00097	0.00018	3.97346	-0.138151	1.00742
216601_at	AOC4P	1.75e-12	3.69e-14	9.63354	21.813	1.32376
205083_at	AOX1	6.19e-20	2.38e-22	-14.6739	40.5431	-4.7958
205082_s_at	AOX1	3.59e-07	2.47e-08	-6.33931	8.52359	-1.65862
1562871_at	AOX2P	1.58e-09	6.44e-11	7.80023	14.4026	1.12177
218261_at	AP1M2	0.000141	1.94e-05	4.60847	2.00506	1.09718
230264_s_at	AP1S2	3.55e-09	1.57e-10	-7.58235	13.518	-1.86926
228415_at	AP1S2	1.47e-20	5.02e-23	15.1318	42.0852	2.56638
203142_s_at	AP3B1	0.00193	0.000406	3.72819	-0.915037	1.03745
1570032_at	AP3B2	6.77e-06	6.29e-07	5.52009	5.34378	1.11845
202652_at	APBB1	4.02e-09	1.8e-10	-7.54916	13.3833	-1.03124
1554571_at	APBB1IP	6.34e-16	6.1e-18	-11.8604	30.4665	-1.30433
213419_at	APBB2	0.000952	0.000176	3.97959	-0.118352	1.1326
216750_at	APBB2	5.79e-09	2.7e-10	7.45015	12.9818	2.2323
216933_x_at	APC	5.21e-14	7.86e-16	-10.6012	25.6369	-3.40077
215310_at	APC	0.00692	0.00189	3.23856	-2.36634	1.42534
1556900_at	APCDD1L-AS1	0.00254	0.000563	3.62717	-1.22574	1.403
1559280_a_at	APELA	0.00427	0.00105	3.43056	-1.81399	1.14694
226358_at	APH1B	2.09e-05	2.23e-06	-5.18991	4.10505	-1.21629
232630_at	APIP	7.37e-07	5.4e-08	-6.1435	7.75227	-1.75449
213592_at	APLNR	0.000133	1.81e-05	4.62775	2.07278	1.09843
209462_at	APLP1	0.00762	0.00212	3.20045	-2.47328	1.06371
204450_x_at	APOA1	2.68e-05	2.94e-06	5.11705	3.83584	1.54107
217073_x_at	APOA1	2.02e-05	2.15e-06	5.19965	4.14114	1.57038
209584_x_at	APOBEC3C	2.1e-11	5.57e-13	-8.962	19.1153	-1.71792
243912_x_at	APOBEC3F	0.0147	0.00477	2.92256	-3.22444	1.00979
215579_at	APOBEC3G	0.0167	0.00559	2.8662	-3.37045	1.02182
221087_s_at	APOL3	1.93e-05	2.05e-06	-5.213	4.1907	-1.34054
221031_s_at	APOLD1	1.27e-09	5.05e-11	7.85939	14.643	1.41164
222538_s_at	APPL1	1.3e-16	1.1e-18	12.3176	32.1733	3.042
213611_at	AQP5	0.000583	9.9e-05	4.14761	0.431673	1.11095
205568_at	AQP9	1.75e-10	5.73e-12	-8.39068	16.8015	-2.7247
228694_at	AQR	1.94e-08	1.01e-09	-7.12861	11.681	-1.34217
212583_at	AQR	1.72e-08	8.85e-10	-7.16002	11.8079	-1.19304
239895_at	AQR	1.48e-05	1.51e-06	-5.29276	4.4877	-1.09505
235806_at	ARAP3	1.75e-16	1.52e-18	-12.2298	31.8475	-1.10684
218950_at	ARAP3	1.45e-09	5.85e-11	7.8236	14.4976	1.28677
215927_at	ARFGEF2	0.000841	0.000152	4.02274	0.021601	1.22476
231856_at	ARFGEF3	9.9e-05	1.3e-05	-4.71858	2.39369	-1.02465
218230_at	ARFIP1	3.57e-05	4.07e-06	5.03122	3.52077	1.36457
202109_at	ARFIP2	0.000286	4.35e-05	4.38246	1.22221	1.15723
231665_at	ARG1	1.55e-05	1.6e-06	5.27813	4.4331	1.17859
203946_s_at	ARG2	0.00357	0.000842	3.50071	-1.60667	1.08529
227448_at	ARGLU1	7.43e-06	6.99e-07	-5.49287	5.24056	-1.37963
217153_at	ARHGAP1	5.36e-11	1.55e-12	-8.71063	18.0988	-1.34946
204492_at	ARHGAP11A	3.49e-06	3.02e-07	5.70786	6.06059	1.31035
225166_at	ARHGAP18	9.4e-16	9.47e-18	-11.7445	30.0294	-2.92188
225171_at	ARHGAP18	5.13e-08	2.9e-09	-6.86907	10.636	-2.14095
225173_at	ARHGAP18	1.75e-12	3.69e-14	-9.63304	21.811	-1.793
226638_at	ARHGAP23	7.19e-12	1.72e-13	-9.2521	20.2843	-2.03994
204882_at	ARHGAP25	2.42e-05	2.62e-06	-5.14733	3.94752	-1.02625
229424_s_at	ARHGAP27	0.00158	0.000319	3.80164	-0.685659	1.04799
202045_s_at	ARHGAP35	0.000679	0.000118	4.09594	0.26111	1.03165
205414_s_at	ARHGAP44	8.36e-09	4.04e-10	-7.35216	12.5849	-2.10643
215232_at	ARHGAP44	9.52e-15	1.21e-16	-11.08	27.4945	-1.26357
206167_s_at	ARHGAP6	1.57e-10	5.1e-12	-8.41927	16.9175	-2.98975
1554703_at	ARHGEF10	4.37e-12	1.01e-13	-9.38363	20.8126	-1.81155
216620_s_at	ARHGEF10	1.7e-08	8.74e-10	-7.16325	11.8209	-1.56157
215139_at	ARHGEF10	8.86e-11	2.7e-12	-8.57458	17.5476	-1.02778
1559833_at	ARHGEF12	4.9e-09	2.25e-10	-7.49461	13.1621	-1.25028
201334_s_at	ARHGEF12	1.37e-21	3.55e-24	15.929	44.7053	2.34648
201333_s_at	ARHGEF12	1.15e-10	3.59e-12	8.50515	17.266	2.67622
205507_at	ARHGEF15	8.26e-13	1.62e-14	9.83893	22.6316	3.40143
226857_at	ARHGEF19	2.57e-06	2.15e-07	5.79432	6.39333	1.24847
209435_s_at	ARHGEF2	2.66e-16	2.41e-18	12.107	31.3901	2.39954
233903_s_at	ARHGEF26	3.69e-07	2.54e-08	-6.3319	8.49433	-1.86262
1556881_at	ARHGEF33	4.57e-10	1.65e-11	-8.13207	15.7511	-1.07911
231892_at	ARHGEF39	0.00331	0.000769	3.52926	-1.52146	1.43059
241631_at	ARHGEF40	5.29e-05	6.33e-06	4.9127	3.08959	1.57003
209539_at	ARHGEF6	7.23e-13	1.39e-14	-9.87597	22.7789	-2.63986
1562270_at	ARHGEF7	6.25e-21	1.92e-23	-15.4181	43.0354	-2.5246
235412_at	ARHGEF7	2.76e-15	3.07e-17	-11.4362	28.8597	-1.87854
1562271_x_at	ARHGEF7	5.02e-11	1.44e-12	-8.72893	18.1729	-1.14065
212152_x_at	ARID1A	2.51e-07	1.65e-08	-6.43905	8.91871	-1.22953
210649_s_at	ARID1A	0.0114	0.00349	3.03141	-2.93629	1.05048
1566990_x_at	ARID1B	0.000574	9.72e-05	4.15313	0.449985	1.21941
1566989_at	ARID1B	8.5e-07	6.36e-08	6.10266	7.5922	1.27625
223111_x_at	ARID4B	4.31e-05	5.02e-06	4.97518	3.31633	1.25166
1558000_at	ARID5B	2.99e-11	8.14e-13	-8.86877	18.7386	-1.0489
1553208_s_at	ARL10	1.48e-12	3.07e-14	9.67885	21.9939	3.39162
202208_s_at	ARL4C	0.000479	7.9e-05	4.21296	0.649194	1.46079
240275_at	ARMC3	1.34e-12	2.73e-14	9.70787	22.1097	3.11226
223794_at	ARMC4	0.00353	0.000832	-3.50448	-1.59543	-1.13729
236966_at	ARMC8	2.32e-09	9.83e-11	-7.69705	13.9836	-1.30948
235938_at	ARMC9	1.28e-08	6.45e-10	-7.23757	12.1212	-1.11645
218694_at	ARMCX1	1.47e-05	1.5e-06	-5.29496	4.49593	-1.66601
227444_at	ARMCX4	2.49e-14	3.53e-16	-10.8059	26.434	-2.41591
1552327_at	ARMCX4	1.3e-12	2.63e-14	-9.7174	22.1476	-1.54962
218222_x_at	ARNT	0.0352	0.0142	2.52	-4.2177	1.19218
202986_at	ARNT2	0.00616	0.00164	-3.28573	-2.23273	-1.13706
226914_at	ARPC5L	6.14e-05	7.49e-06	4.86752	2.92647	1.01775
220966_x_at	ARPC5L	3.07e-08	1.66e-09	7.00625	11.1877	1.17806
49111_at	ARRB1	0.0288	0.011	2.61719	-3.9887	1.02059
221861_at	ARRB1	0.0279	0.0106	2.63098	-3.95563	1.0528
225283_at	ARRDC4	1.6e-05	1.65e-06	-5.2687	4.39794	-2.26403
1554032_at	ARSB	1.25e-12	2.53e-14	-9.72729	22.1871	-1.38664
232197_x_at	ARSB	4.75e-05	5.61e-06	-4.94504	3.2068	-1.18768
230856_at	ARSG	0.00456	0.00113	3.40576	-1.88659	1.2034
207675_x_at	ARTN	0.011	0.00334	3.04588	-2.8974	1.28796
205784_x_at	ARVCF	0.000515	8.58e-05	4.18921	0.569888	1.01281
238878_at	ARX	2.09e-13	3.55e-15	-10.2197	24.1397	-2.63409
236033_at	ASB12	0.000134	1.82e-05	4.63123	2.06965	1.4326
218862_at	ASB13	5.1e-20	1.9e-22	14.739	40.7637	3.07961
237785_at	ASB14	1.53e-10	4.95e-12	-8.42649	16.9469	-1.33051
233857_s_at	ASB2	0.000393	6.27e-05	4.27882	0.870336	1.12371
1554627_a_at	ASCC1	0.0101	0.00301	3.08249	-2.79834	1.10886
213768_s_at	ASCL1	0.00644	0.00173	3.2681	-2.28283	1.31278
206130_s_at	ASGR2	0.00182	0.000377	3.75028	-0.846337	1.05102
1554057_at	ASH1L-AS1	0.000117	1.56e-05	4.66761	2.21325	1.42828
37953_s_at	ASIC1	1.23e-05	1.23e-06	5.3457	4.68584	1.09223
206690_at	ASIC2	0.0311	0.0121	2.57971	-4.07786	1.00256
214498_at	ASIP	0.0353	0.0142	2.51907	-4.21986	1.10522
204608_at	ASL	2.22e-05	2.39e-06	5.17245	4.04039	1.02237
241354_at	ASMTL-AS1	2.46e-08	1.3e-09	7.06556	11.4267	1.12188
206030_at	ASPA	3.85e-06	3.37e-07	-5.67993	5.95344	-1.26898
219918_s_at	ASPM	0.00155	0.000311	3.80862	-0.663718	1.12872
232238_at	ASPM	0.000151	2.1e-05	4.58631	1.9274	1.31662
218857_s_at	ASRGL1	6.65e-08	3.85e-09	6.79939	10.3564	1.62823
222764_at	ASRGL1	5.04e-08	2.84e-09	6.87423	10.6567	2.80765
207076_s_at	ASS1	4.21e-05	4.88e-06	4.98248	3.3429	1.58639
244519_at	ASXL1	0.00011	1.47e-05	4.68498	2.27464	1.08277
240072_at	ASXL2	5.37e-06	4.86e-07	5.58619	5.59516	2.33275
214162_at	ASXL3	0.000238	3.53e-05	-4.44174	1.42552	-1.04545
218782_s_at	ATAD2	0.00043	6.97e-05	4.2489	0.769626	1.34459
222740_at	ATAD2	1.3e-05	1.3e-06	5.33104	4.63092	1.66307
218874_s_at	ATAT1	0.00028	4.26e-05	4.38884	1.24402	1.10076
200779_at	ATF4	1.39e-18	7.49e-21	13.6863	37.1233	1.85246
207728_at	ATF7IP	7.31e-08	4.28e-09	-6.77301	10.2507	-1.21318
219870_at	ATF7IP2	1.25e-08	6.25e-10	-7.24534	12.1526	-1.14457
218214_at	ATG101	0.000343	5.36e-05	4.32375	1.0223	1.05366
226684_at	ATG2B	3.22e-06	2.76e-07	-5.7309	6.14908	-1.16999
218673_s_at	ATG7	0.000595	0.000101	4.14083	0.409226	1.15311
202492_at	ATG9A	1.58e-11	4.09e-13	9.03792	19.4217	1.18444
223340_at	ATL1	1.7e-05	1.77e-06	-5.25022	4.32907	-1.1603
1553603_s_at	ATL2	1.57e-05	1.62e-06	5.27475	4.42048	1.09735
40489_at	ATN1	0.00104	0.000196	3.94784	-0.220726	1.13513
214070_s_at	ATP10B	6.66e-05	8.24e-06	4.84169	2.83349	1.23903
220920_at	ATP10B	1.38e-06	1.09e-07	5.96668	7.06124	1.32304
213238_at	ATP10D	8.78e-11	2.68e-12	-8.57698	17.5573	-2.19565
213582_at	ATP11A	2.27e-06	1.88e-07	-5.82929	6.52835	-1.63606
230875_s_at	ATP11A	0.000719	0.000126	-4.07664	0.197694	-1.42713
1564063_a_at	ATP11B	7.14e-06	6.68e-07	5.50435	5.28408	1.15087
1554556_a_at	ATP11B	0.0192	0.00665	2.80336	-3.53064	1.19534
1561332_at	ATP13A5	0.00181	0.000375	3.75252	-0.839368	1.63772
1559376_at	ATP1A1-AS1	1.43e-05	1.45e-06	-5.3029	4.52559	-1.08143
230696_at	ATP2A1-AS1	0.000333	5.18e-05	4.33316	1.05426	1.02471
207026_s_at	ATP2B3	0.0104	0.00312	3.06933	-2.83404	1.1648
207139_at	ATP4A	7.59e-10	2.87e-11	7.99732	15.2035	2.69633
230535_s_at	ATP5E	0.000142	1.95e-05	-4.60623	1.99719	-1.13369
217801_at	ATP5E	5.46e-05	6.57e-06	4.90291	3.05419	1.00587
208972_s_at	ATP5G1	4.32e-08	2.39e-09	6.91648	10.8265	1.07397
1564482_at	ATP5O	0.00619	0.00165	3.28347	-2.23916	1.00858
239859_x_at	ATP5S	1.5e-09	6.08e-11	-7.81403	14.4587	-1.81591
237400_at	ATP5S	8.07e-05	1.02e-05	-4.78267	2.622	-1.31231
1557759_at	ATP5SL	1.17e-08	5.84e-10	-7.26184	12.2193	-1.09774
218038_at	ATP5SL	3.12e-11	8.51e-13	8.85773	18.694	2.04081
213587_s_at	ATP6V0E2	9.75e-07	7.4e-08	6.06435	7.44228	1.40872
205473_at	ATP6V1B1	3.46e-07	2.36e-08	6.35016	8.56651	1.95438
1557586_s_at	ATP6V1H	0.0013	0.000255	3.86859	-0.474108	1.20084
226302_at	ATP8B1	0.000708	0.000124	4.08216	0.215817	1.2143
226771_at	ATP8B2	0.000892	0.000163	-4.00245	-0.044323	-1.44342
1554704_at	ATP8B3	5.55e-08	3.16e-09	-6.8482	10.5522	-1.79316
214934_at	ATP9B	0.000175	2.48e-05	-4.54037	1.76702	-1.0496
213745_at	ATRNL1	2.57e-10	8.81e-12	-8.28567	16.3751	-2.94072
1559249_at	ATXN1	2.96e-11	8.04e-13	-8.87183	18.751	-1.89369
203232_s_at	ATXN1	0.000186	2.66e-05	-4.52074	1.69872	-1.15363
201806_s_at	ATXN2L	0.0102	0.00304	3.07873	-2.80855	1.00203
217321_x_at	ATXN3	2.02e-05	2.14e-06	-5.24237	4.17235	-2.67062
222946_s_at	AUNIP	1.68e-08	8.63e-10	7.16646	11.8339	1.16082
220011_at	AUNIP	0.0013	0.000254	3.87039	-0.468383	1.59762
204092_s_at	AURKA	6.11e-07	4.4e-08	6.19505	7.95475	1.55663
208079_s_at	AURKA	5.18e-10	1.89e-11	8.09936	15.6182	1.97922
222677_x_at	AURKAIP1	2.73e-09	1.18e-10	-7.65273	13.8036	-1.54691
225552_x_at	AURKAIP1	0.000613	0.000105	4.13078	0.375963	1.02754
218580_x_at	AURKAIP1	0.00043	6.97e-05	4.24868	0.768898	1.04571
209464_at	AURKB	5.71e-07	4.09e-08	6.2135	8.02734	2.35421
243364_at	AUTS2	4.68e-07	3.28e-08	6.26802	8.24212	2.01106
244355_at	AVL9	0.0035	0.000822	3.50831	-1.58404	1.98291
206251_s_at	AVPR1A	0.00477	0.0012	-3.38772	-1.93918	-1.05073
238835_at	AVPR1A	0.00176	0.000363	-3.762	-0.8098	-1.04488
202686_s_at	AXL	6.91e-12	1.64e-13	-9.26268	20.3268	-2.9194
232311_at	B2M	7.59e-16	7.46e-18	-11.8075	30.2671	-1.29117
217452_s_at	B3GALT2	8.9e-16	8.85e-18	-11.7624	30.0971	-3.45343
210121_at	B3GALT2	6.9e-17	5.47e-19	-12.5045	32.8635	-2.69431
1553959_a_at	B3GALT6	1.78e-05	1.86e-06	5.23743	4.28149	1.31062
227083_at	B3GLCT	1.02e-09	3.99e-11	-7.91717	14.8778	-1.85302
219326_s_at	B3GNT2	0.00831	0.00236	3.1646	-2.57301	1.02246
222870_s_at	B3GNT2	4.84e-09	2.22e-10	7.49857	13.1781	1.05352
201883_s_at	B4GALT1	4.17e-05	4.84e-06	-4.98468	3.35092	-1.06822
235333_at	B4GALT6	0.00238	0.000521	-3.65094	-1.15313	-1.23052
210534_s_at	B9D1	9.95e-07	7.59e-08	-6.05826	7.41848	-1.55399
218899_s_at	BAALC	5.04e-05	6e-06	-4.92716	3.14195	-1.49906
222462_s_at	BACE1	3.22e-13	5.68e-15	10.1011	23.6713	2.93075
227051_at	BACE2	0.000463	7.59e-05	4.22436	0.687316	1.06528
217867_x_at	BACE2	1.6e-05	1.65e-06	5.2688	4.39829	1.38395
222446_s_at	BACE2	1.93e-07	1.24e-08	6.51023	9.20147	2.08366
204194_at	BACH1	9.72e-06	9.39e-07	-5.41629	4.95123	-1.47334
234938_at	BACH1	0.0111	0.00336	3.0444	-2.90137	1.03628
221234_s_at	BACH2	0.00197	0.000415	-3.7212	-0.936714	-1.04014
222909_s_at	BAG4	0.00076	0.000135	4.05836	0.137817	1.10333
230513_at	BAG6	2.28e-19	1.02e-21	-14.2532	39.102	-1.32869
1559075_s_at	BAHCC1	4.16e-14	6.17e-16	10.6631	25.8785	1.6623
209502_s_at	BAIAP2	1.81e-10	5.97e-12	-8.38074	16.7612	-1.65426
205294_at	BAIAP2	2.91e-05	3.23e-06	5.09238	3.74504	1.19261
1558147_a_at	BAIAP2-AS1	0.0058	0.00152	3.31006	-2.1633	1.10129
227372_s_at	BAIAP2L1	8.85e-07	6.65e-08	6.09153	7.54859	1.17786
227371_at	BAIAP2L1	0.000204	2.95e-05	4.49171	1.59805	1.53548
203728_at	BAK1	1.13e-08	5.59e-10	7.27244	12.2622	1.65413
203304_at	BAMBI	3.19e-11	8.75e-13	-8.85098	18.6667	-2.35506
227545_at	BARD1	9.77e-09	4.8e-10	7.31008	12.4145	1.47302
1561506_at	BARX1-AS1	0.000483	7.97e-05	4.21041	0.640644	1.4541
228589_at	BASP1	8.92e-08	5.34e-09	-6.71855	10.0326	-1.08777
205363_at	BBOX1	8.26e-19	4.26e-21	13.8454	37.6828	3.80348
243018_at	BBOX1-AS1	7.32e-06	6.86e-07	5.49742	5.25783	1.45834
229603_at	BBS12	7.92e-07	5.86e-08	-6.1233	7.67305	-1.43628
223227_at	BBS2	4.67e-05	5.5e-06	-4.95059	3.22692	-1.20527
37547_at	BBS9	0.0004	6.41e-05	-4.27292	0.850445	-1.00676
242843_at	BCAN	1.93e-12	4.09e-14	-9.60736	21.7084	-1.39389
91920_at	BCAN	1.71e-05	1.79e-06	5.24863	4.32314	1.28338
241640_at	BCAP29	0.00306	0.000701	3.55848	-1.43379	1.07923
236970_s_at	BCAP29	1.17e-14	1.53e-16	11.0211	27.2675	4.30688
204032_at	BCAR3	2.12e-12	4.52e-14	-9.58296	21.6109	-2.39317
214390_s_at	BCAT1	0.00015	2.09e-05	4.58787	1.93286	1.70021
205433_at	BCHE	8.98e-20	3.61e-22	-14.5525	40.1296	-5.11062
202331_at	BCKDHA	0.002	0.000423	3.71511	-0.955586	1.44508
222891_s_at	BCL11A	7.45e-06	7.01e-07	5.492	5.23727	1.27257
210347_s_at	BCL11A	1.22e-05	1.21e-06	5.34969	4.70081	1.44509
219498_s_at	BCL11A	1.4e-10	4.49e-12	8.45004	17.0424	1.64716
219497_s_at	BCL11A	4.45e-07	3.11e-08	6.28154	8.29543	1.73857
203685_at	BCL2	1.66e-05	1.73e-06	-5.2574	4.35582	-1.65703
1553088_a_at	BCL2L11	6.05e-05	7.36e-06	4.87211	2.94298	1.17305
222343_at	BCL2L11	1.6e-08	8.19e-10	7.17899	11.8845	1.17494
1558143_a_at	BCL2L11	0.000235	3.46e-05	4.44696	1.44352	1.25395
227616_at	BCL9L	1.68e-07	1.07e-08	6.54675	9.34679	2.57099
220087_at	BCO1	1.46e-06	1.16e-07	-5.95232	7.00537	-1.21696
223915_at	BCOR	1.84e-09	7.61e-11	-7.75948	14.2371	-1.08634
1562313_at	BCORP1	9.34e-11	2.86e-12	8.56068	17.4912	1.64248
1553591_at	BCRP3	0.000219	3.21e-05	4.46828	1.51704	1.04953
207618_s_at	BCS1L	0.000813	0.000146	4.03465	0.060419	1.09075
211715_s_at	BDH1	3.37e-06	2.9e-07	5.71819	6.10027	1.05659
235155_at	BDH2	1.25e-12	2.52e-14	-9.72778	22.189	-2.14472
218285_s_at	BDH2	1.04e-05	1.01e-06	-5.39663	4.87716	-1.1717
207510_at	BDKRB1	4.83e-11	1.38e-12	-8.73871	18.2125	-1.32652
206382_s_at	BDNF	0.00424	0.00104	-3.43373	-1.80468	-1.22161
1567361_at	BDNF-AS	8.06e-06	7.65e-07	-5.46946	5.15197	-1.05487
231939_s_at	BDP1	1.65e-11	4.29e-13	-9.0263	19.3748	-1.46387
214068_at	BEAN1	1.38e-06	1.09e-07	-5.96805	7.06658	-1.23331
227920_at	BEND3	2.23e-05	2.41e-06	5.17008	4.03161	1.08867
1554442_at	BEST1	1.58e-41	5.79e-46	37.6062	92.9585	4.5481
207432_at	BEST2	0.0273	0.0103	2.6428	-3.92719	1.27511
218332_at	BEX1	1.31e-05	1.32e-06	-5.32831	4.62069	-2.03432
229963_at	BEX5	0.000367	5.8e-05	-4.30106	0.945467	-1.33435
201169_s_at	BHLHE40	8.01e-05	1.02e-05	-4.78512	2.63073	-1.13653
223185_s_at	BHLHE41	0.00174	0.000359	3.7657	-0.798253	1.44299
231243_s_at	BHLHE41	0.009	0.0026	3.13215	-2.6626	1.47629
213429_at	BICC1	0.00231	0.000503	-3.66178	-1.11991	-1.04206
204741_at	BICD1	0.0083	0.00235	3.16542	-2.57074	1.0485
231964_at	BICD1	0.0236	0.00858	2.71017	-3.76307	1.05217
242228_at	BICD1	0.00515	0.00131	3.35784	-2.02583	1.21275
1554020_at	BICD1	0.000152	2.11e-05	4.58502	1.9229	1.64705
228320_x_at	BICDL1	0.00146	0.000292	-3.82803	-0.602558	-1.30687
210201_x_at	BIN1	3.38e-09	1.49e-10	7.59606	13.5736	1.22498
210538_s_at	BIRC3	0.0141	0.00451	-2.94226	-3.17287	-1.31431
202094_at	BIRC5	2.69e-05	2.95e-06	5.11652	3.83388	1.04854
1555826_at	BIRC5	1.28e-05	1.28e-06	5.33534	4.647	1.08953
202095_s_at	BIRC5	1.27e-06	9.87e-08	5.99187	7.15936	1.46118
224635_s_at	BIRC6	7.68e-19	3.9e-21	13.8701	37.7694	2.82181
229478_x_at	BIVM	2.62e-08	1.39e-09	-7.04868	11.3586	-2.00338
233255_s_at	BIVM	6.94e-05	8.64e-06	-4.82903	2.78803	-1.22609
232105_at	BLACAT1	2.57e-10	8.84e-12	8.2847	16.3712	2.37677
205733_at	BLM	1.57e-05	1.61e-06	5.2753	4.42253	1.33448
222826_at	BLOC1S6	9.21e-05	1.2e-05	-4.74087	2.47294	-1.04355
205290_s_at	BMP2	2.82e-15	3.16e-17	-11.4291	28.8328	-1.58998
205289_at	BMP2	1.32e-07	8.21e-09	-6.61243	9.60858	-1.54083
211518_s_at	BMP4	0.00196	0.000411	-3.72382	-0.928576	-1.27995
209591_s_at	BMP7	0.00244	0.000537	3.64173	-1.18131	1.36299
220204_s_at	BMP8A	0.000211	3.07e-05	4.48075	1.56011	1.14468
242731_x_at	BMPR1A	0.00107	0.000202	3.93813	-0.251936	1.14969
231873_at	BMPR2	2e-09	8.35e-11	7.73677	14.1449	1.32639
206464_at	BMX	7.7e-06	7.27e-07	5.48269	5.20202	1.26802
1552487_a_at	BNC1	7.31e-15	9.01e-17	-11.1569	27.7906	-6.02298
206581_at	BNC1	9.72e-37	8.89e-41	-31.0036	81.832	-4.79091
238478_at	BNC2	6.75e-08	3.91e-09	-6.79545	10.3406	-2.34382
230722_at	BNC2	5.4e-08	3.06e-09	-6.85538	10.581	-1.41465
235723_at	BNC2	0.00698	0.00191	-3.23533	-2.37546	-1.02544
37226_at	BNIP1	3.69e-07	2.54e-08	6.33226	8.49576	1.36406
225334_at	BORCS7	0.00545	0.00141	-3.33484	-2.09218	-1.10526
220772_at	BPESC1	4.83e-08	2.71e-09	-6.8852	10.7008	-1.53627
209923_s_at	BRAP	0.000553	9.31e-05	-4.16549	0.491004	-1.03448
229798_s_at	BRI3	1.3e-14	1.71e-16	10.9911	27.1513	1.44862
225716_at	BRI3BP	0.00102	0.000191	3.95573	-0.195323	1.10152
235609_at	BRIP1	9.19e-06	8.82e-07	5.43264	5.01287	1.74931
215631_s_at	BRMS1	6.29e-08	3.62e-09	-6.81431	10.4162	-1.44312
239078_at	BROX	0.0159	0.00525	2.88999	-3.31028	1.1594
204481_at	BRPF1	3.53e-05	4.02e-06	5.03422	3.53175	1.02562
1565843_s_at	BRPF3	0.00418	0.00102	3.43976	-1.78697	1.08532
215010_s_at	BRSK2	0.00506	0.00129	3.36484	-2.00557	1.04157
1559971_at	BSDC1	7.15e-18	4.42e-20	-13.1913	35.3611	-1.39446
1552548_at	BSND	1.15e-05	1.14e-06	-5.36537	4.75964	-1.85556
218792_s_at	BSPRY	6.12e-12	1.44e-13	9.29498	20.4566	1.3678
205715_at	BST1	0.0015	0.000302	-3.81834	-0.633122	-1.16115
228570_at	BTBD11	1.78e-11	4.64e-13	9.00677	19.296	2.2916
234682_at	BTBD9	0.000822	0.000148	4.03054	0.046996	1.61365
204167_at	BTD	2.69e-15	2.99e-17	-11.4435	28.8877	-2.33707
208529_at	BTF3P11	0.00225	0.000485	-3.67307	-1.08526	-1.04992
213134_x_at	BTG3	0.00859	0.00245	3.15118	-2.61015	1.07067
205548_s_at	BTG3	0.000922	0.000169	3.99068	-0.08246	1.36476
1554362_at	BTG4	4.36e-18	2.58e-20	-13.341	35.8974	-2.74645
38241_at	BTN3A3	0.000386	6.16e-05	-4.28425	0.888662	-1.30278
204821_at	BTN3A3	0.00112	0.000214	-3.92105	-0.306737	-1.05584
220421_at	BTNL8	0.00746	0.00206	3.20953	-2.44787	1.1144
229985_at	BTNL9	0.00985	0.0029	3.09417	-2.76657	1.14495
224471_s_at	BTRC	9.11e-08	5.47e-09	-6.71265	10.009	-1.20887
215509_s_at	BUB1	0.023	0.00832	2.72152	-3.73508	1.07994
209642_at	BUB1	4.26e-11	1.21e-12	8.7722	18.3481	2.55435
203755_at	BUB1B	9.84e-10	3.84e-11	7.92647	14.9156	2.63409
203612_at	BYSL	1.25e-05	1.25e-06	5.34194	4.67173	1.05765
217809_at	BZW2	0.00034	5.31e-05	4.32625	1.03078	1.33565
216393_at	C10orf12	6.69e-16	6.5e-18	-11.8439	30.4045	-1.76092
1553915_at	C10orf126	0.0041	0.000995	-3.4525	-1.75779	-1.72808
228372_at	C10orf128	0.017	0.00569	2.85963	-3.38734	1.15969
225373_at	C10orf54	8.88e-08	5.32e-09	-6.71957	10.0367	-2.02669
1553845_x_at	C10orf67	0.00347	0.000815	3.51102	-1.57594	1.06311
1562657_a_at	C10orf90	1.43e-09	5.76e-11	7.82746	14.5133	2.11632
1553880_at	C10orf91	2.38e-05	2.58e-06	-5.1515	3.96291	-1.32185
227736_at	C10orf99	0.00879	0.00253	3.14134	-2.63728	1.02077
227735_s_at	C10orf99	0.00591	0.00156	3.30251	-2.18487	1.48182
239789_at	C11orf49	0.000101	1.33e-05	4.71257	2.37237	1.21905
220141_at	C11orf63	9.8e-12	2.42e-13	9.16778	19.945	3.0937
238593_at	C11orf80	3.81e-07	2.63e-08	-6.3232	8.45993	-1.66138
1557181_s_at	C11orf87	3.45e-05	3.91e-06	5.0415	3.55839	1.01028
218641_at	C11orf95	0.000164	2.31e-05	-4.5595	1.8337	-1.1022
226349_at	C12orf45	0.0115	0.00353	3.02756	-2.94661	1.37786
236840_at	C12orf56	6.24e-08	3.59e-09	6.8165	10.425	2.03945
1560277_a_at	C12orf80	0.000202	2.93e-05	4.49365	1.60476	1.2178
237328_at	C14orf105	3.59e-08	1.96e-09	6.9657	11.0244	2.36439
1554039_at	C14orf159	7.65e-05	9.64e-06	4.79932	2.68152	1.08401
238647_at	C14orf28	0.00161	0.000328	-3.79286	-0.713221	-1.07737
223484_at	C15orf48	0.00221	0.000477	3.67805	-1.06996	1.75001
1565641_at	C16orf45	7.28e-47	1.33e-51	46.2211	104.615	6.05078
1559584_a_at	C16orf54	1.98e-05	2.1e-06	-5.20655	4.16673	-1.89
230074_s_at	C16orf58	0.00187	0.00039	3.73989	-0.878689	1.37981
219556_at	C16orf59	9.87e-09	4.85e-10	7.30727	12.4031	1.12217
1558557_at	C16orf62	8.74e-12	2.13e-13	-9.19871	20.0695	-2.56038
223440_at	C16orf70	1.19e-08	5.96e-10	7.25673	12.1987	2.08066
220743_at	C16orf72	0.00586	0.00154	3.30599	-2.17495	1.0707
238167_at	C17orf51	1.73e-06	1.4e-07	-5.90446	6.81945	-2.10743
228066_at	C17orf96	0.00474	0.00119	3.39027	-1.93174	1.18637
244324_at	C18orf54	6.08e-07	4.37e-08	6.19644	7.96023	1.81437
243721_at	C18orf61	0.0038	0.000909	3.47631	-1.6791	1.04495
232348_at	C18orf8	2.11e-10	7.1e-12	-8.33839	16.5892	-1.27351
227704_at	C19orf12	4.04e-15	4.68e-17	-11.3265	28.441	-1.25149
241862_x_at	C19orf45	0.0203	0.0071	2.77968	-3.59029	1.06502
1560830_a_at	C19orf84	7.9e-07	5.83e-08	-6.12423	7.67671	-1.23957
226105_at	C1GALT1	1.62e-06	1.29e-07	5.92424	6.89625	1.26882
219010_at	C1orf106	3.11e-12	6.91e-14	9.47721	21.1877	2.74714
228865_at	C1orf116	0.00017	2.4e-05	4.549	1.79707	1.05212
219476_at	C1orf116	6.58e-05	8.13e-06	4.84534	2.84664	1.38309
219337_at	C1orf159	0.00785	0.0022	3.18786	-2.5084	1.17524
228532_at	C1orf162	3.08e-06	2.63e-07	-5.74361	6.19799	-1.23424
238625_at	C1orf168	7.85e-09	3.76e-10	-7.36921	12.6539	-3.85546
212791_at	C1orf216	2.1e-06	1.73e-07	-5.85076	6.61139	-1.03447
238366_at	C1orf228	0.0123	0.00379	3.00225	-3.01426	1.13394
222720_x_at	C1orf27	3.69e-07	2.54e-08	-6.33213	8.49522	-1.23833
239349_at	C1QTNF7	2.3e-06	1.9e-07	-5.82606	6.51586	-1.7224
222277_at	C1QTNF9B-AS1	9.64e-06	9.29e-07	5.41898	4.96136	1.65323
212067_s_at	C1R	0.00422	0.00103	-3.43621	-1.79741	-1.18946
218983_at	C1RL	2.83e-06	2.39e-07	-5.7678	6.29109	-1.87519
1555229_a_at	C1S	8.46e-12	2.06e-13	-9.20715	20.1035	-2.05555
208747_s_at	C1S	0.00155	0.000314	-3.80637	-0.67079	-1.3023
1567035_at	C20orf181	2.02e-10	6.74e-12	8.35087	16.6399	1.45344
225825_at	C20orf194	1.94e-07	1.25e-08	-6.50798	9.19254	-1.11814
1556722_a_at	C20orf203	1.29e-06	1.01e-07	5.98613	7.137	2.08544
218081_at	C20orf27	0.00567	0.00148	3.31908	-2.13746	1.42393
50314_i_at	C20orf27	9.87e-09	4.85e-10	7.30729	12.4032	1.43339
238582_at	C21orf2	1.69e-07	1.07e-08	-6.54627	9.34487	-1.04507
1553789_a_at	C21orf58	0.0198	0.00689	2.79055	-3.56296	1.2982
220543_at	C21orf62	3.5e-12	7.87e-14	-9.44508	21.059	-1.83212
220941_s_at	C21orf91	4.87e-05	5.79e-06	4.93701	3.17766	1.6071
1558334_a_at	C22orf15	0.00185	0.000385	3.7443	-0.864955	1.02773
223706_at	C22orf23	0.000293	4.48e-05	4.37471	1.19574	1.1931
230819_at	C2CD4C	0.00117	0.000225	3.90676	-0.35247	1.52699
223623_at	C2orf40	0.000334	5.21e-05	-4.3318	1.04964	-1.8782
65472_at	C2orf68	4.83e-08	2.71e-09	-6.88533	10.7013	-1.59972
223754_at	C2orf88	4.38e-05	5.1e-06	4.97058	3.29957	1.40531
228195_at	C2orf88	0.000248	3.69e-05	4.42898	1.38163	1.6656
217767_at	C3	0.00151	0.000302	-3.81789	-0.634513	-1.5728
219474_at	C3orf52	0.00119	0.000229	-3.90134	-0.369793	-1.11572
235562_at	C3orf70	5.63e-12	1.32e-13	-9.31725	20.5461	-1.49483
236984_at	C4orf26	0.0195	0.00677	2.79709	-3.54649	1.1002
224602_at	C4orf3	0.00112	0.000214	-3.92167	-0.304757	-1.0279
227856_at	C4orf32	9.02e-06	8.64e-07	-5.43794	5.03286	-1.52018
220088_at	C5AR1	6.53e-11	1.92e-12	-8.6578	17.8848	-2.98232
224876_at	C5orf24	2.76e-14	3.98e-16	10.7752	26.315	1.71802
229886_at	C5orf34	4.52e-06	4.02e-07	5.63503	5.7816	1.65969
210168_at	C6	2.02e-05	2.15e-06	5.2004	4.14391	1.53357
221786_at	C6orf120	1.17e-08	5.86e-10	-7.26119	12.2167	-2.08176
1552575_a_at	C6orf141	0.0163	0.00542	2.87693	-3.34281	1.13839
236504_x_at	C6orf52	0.000892	0.000163	4.00254	-0.044001	1.35989
1556359_at	C6orf89	2.2e-09	9.29e-11	-7.7107	14.039	-1.16508
202992_at	C7	7.11e-05	8.87e-06	-4.82185	2.76227	-2.87781
1555757_at	C7orf34	0.0107	0.00323	3.05749	-2.86607	1.00475
231380_at	C8orf34	3.17e-05	3.56e-06	-5.06682	3.65118	-1.32185
1556421_at	C8orf34-AS1	0.00576	0.00151	-3.31276	-2.15555	-1.65504
218541_s_at	C8orf4	2.8e-08	1.5e-09	7.03049	11.2853	4.06569
1564315_at	C8orf49	1.03e-10	3.21e-12	-8.53227	17.376	-2.09521
226710_at	C8orf82	0.00376	0.000898	3.48004	-1.66804	1.08965
1557961_s_at	C8orf88	2.51e-12	5.45e-14	-9.53647	21.425	-2.95466
230985_at	C9orf131	0.00658	0.00177	-3.25956	-2.30704	-1.07849
204480_s_at	C9orf16	6.58e-05	8.13e-06	4.84542	2.84692	1.16704
41047_at	C9orf16	1.02e-08	5e-10	7.29983	12.373	1.33681
232270_at	C9orf3	3.67e-08	2.01e-09	-6.95955	10.9997	-1.93204
1552757_s_at	C9orf66	0.000351	5.51e-05	4.31573	0.995133	2.06487
233504_at	C9orf84	3.77e-14	5.57e-16	-10.6893	25.9805	-1.8393
238579_at	C9orf85	0.009	0.0026	3.13193	-2.66319	1.16105
238912_x_at	C9orf85	1.57e-13	2.58e-15	10.2999	24.4556	3.36316
205950_s_at	CA1	0.0333	0.0132	2.54681	-4.15525	1.16909
209726_at	CA11	1.98e-08	1.03e-09	-7.12242	11.656	-1.97985
204865_at	CA3	7.13e-08	4.17e-09	-6.77962	10.2771	-1.217
214082_at	CA5B	0.0042	0.00103	-3.43759	-1.79334	-1.03168
207504_at	CA7	1.87e-06	1.52e-07	5.88368	6.73886	1.86764
1555445_at	CA8	2.62e-07	1.74e-08	6.42671	8.86972	1.01445
220234_at	CA8	0.00332	0.000772	3.52799	-1.52525	1.02851
238537_at	CA8	8.11e-05	1.03e-05	4.78118	2.61664	1.58815
225915_at	CAB39L	1.36e-06	1.07e-07	-5.97161	7.08042	-1.51498
225532_at	CABLES1	0.000158	2.21e-05	4.57249	1.87906	1.24041
226004_at	CABLES2	7.31e-10	2.76e-11	8.00695	15.2426	1.00277
224279_s_at	CABYR	0.00141	0.00028	3.84104	-0.561441	1.17379
225627_s_at	CACHD1	8.4e-05	1.08e-05	-4.76971	2.57572	-1.38229
236013_at	CACNA1E	0.00186	0.000388	3.74182	-0.872671	1.13256
208377_s_at	CACNA1F	0.0131	0.00414	2.97221	-3.09399	1.15911
207869_s_at	CACNA1G	8.89e-07	6.68e-08	-6.09036	7.54402	-1.6936
1559061_at	CACNA1G-AS1	0.0195	0.00679	2.79569	-3.55	1.00795
222960_at	CACNA1H	5.63e-06	5.12e-07	5.57283	5.54427	1.77007
227623_at	CACNA2D1	0.000243	3.6e-05	-4.43611	1.40615	-1.90194
207050_at	CACNA2D1	9.99e-13	1.99e-14	-9.78735	22.4264	-1.00729
1559419_at	CACNB2	2.94e-10	1.02e-11	-8.24905	16.2264	-1.47103
213714_at	CACNB2	3.66e-08	2e-09	-6.96029	11.0027	-1.44863
34726_at	CACNB3	0.000585	9.94e-05	-4.14654	0.42814	-1.23486
243244_at	CACNB4	1.09e-17	6.98e-20	13.0654	34.9079	2.08841
244099_at	CACNG2	1.16e-14	1.5e-16	-11.0253	27.2837	-1.28614
206384_at	CACNG3	0.0173	0.00583	2.85114	-3.40909	1.28488
1552863_a_at	CACNG6	0.000582	9.88e-05	4.14835	0.434121	1.33713
227137_at	CACUL1	0.00392	0.000944	3.46427	-1.71473	1.48782
209032_s_at	CADM1	0.00215	0.000461	-3.68911	-1.03589	-1.03477
216535_at	CADM3	0.00148	0.000296	3.82382	-0.615837	1.31515
219572_at	CADPS2	1.64e-07	1.04e-08	-6.55362	9.37417	-2.06679
235829_at	CAHM	0.000198	2.86e-05	-4.50037	1.62806	-1.10809
205626_s_at	CALB1	0.0357	0.0145	2.51279	-4.23443	1.25021
205625_s_at	CALB1	0.0203	0.00711	2.77928	-3.59129	1.6241
205428_s_at	CALB2	6.32e-16	6.07e-18	-11.8618	30.4716	-2.68532
234996_at	CALCRL	1.24e-11	3.13e-13	-9.10387	19.6876	-3.542
210815_s_at	CALCRL	0.026	0.0097	2.66466	-3.87429	1.08774
214880_x_at	CALD1	2.06e-06	1.69e-07	-5.85651	6.63363	-2.34029
235834_at	CALD1	9.14e-10	3.53e-11	-7.94665	14.9976	-1.7118
201617_x_at	CALD1	8.65e-05	1.11e-05	-4.7605	2.54286	-1.67262
215199_at	CALD1	4.7e-13	8.75e-15	-9.99268	23.2421	-1.36756
1554367_at	CALHM1	4.08e-12	9.31e-14	9.40352	20.8924	1.58166
57715_at	CALHM2	0.00394	0.000952	3.46158	-1.72267	1.14427
64408_s_at	CALML4	6.67e-15	8.14e-17	11.1833	27.8918	2.48086
223885_at	CALN1	2.49e-07	1.64e-08	6.4415	8.92841	2.67194
200756_x_at	CALU	0.00413	0.00101	3.44371	-1.77535	1.2112
214845_s_at	CALU	0.00312	0.000718	3.55079	-1.45688	1.36303
235626_at	CAMK1D	0.00491	0.00124	-3.37658	-1.97153	-1.06032
224994_at	CAMK2D	3.4e-08	1.85e-09	-6.97925	11.079	-1.55951
219617_at	CAMKMT	7.43e-06	6.99e-07	-5.49263	5.23966	-1.06195
212763_at	CAMSAP2	8.32e-07	6.21e-08	6.10845	7.61488	1.28152
239771_at	CAND1	7.08e-07	5.17e-08	-6.15464	7.79602	-1.42929
243910_x_at	CAND1	1.25e-11	3.14e-13	-9.10303	19.6842	-1.35738
213547_at	CAND2	0.00359	0.000848	-3.49828	-1.61388	-1.06117
234404_at	CAND2	0.0006	0.000102	4.13793	0.399637	1.07334
238034_at	CANX	2.45e-06	2.04e-07	-5.80825	6.44709	-1.23512
201850_at	CAPG	0.00229	0.000497	3.66577	-1.10768	1.11645
221040_at	CAPN10	5.5e-06	5e-07	-5.57915	5.56835	-1.00086
219333_s_at	CAPN10	0.00145	0.00029	3.83042	-0.595002	1.12072
234709_at	CAPN13	9.12e-05	1.18e-05	4.74418	2.4847	1.44458
210944_s_at	CAPN3	2.55e-08	1.35e-09	-7.05597	11.388	-1.36037
202966_at	CAPN6	3.16e-10	1.11e-11	-8.22904	16.1451	-1.50217
217387_at	CAPN6	0.0232	0.0084	2.71818	-3.74333	1.02774
203356_at	CAPN7	3.11e-05	3.48e-06	-5.07279	3.67308	-1.33602
226424_at	CAPS	0.000893	0.000163	4.0019	-0.046098	1.05235
231729_s_at	CAPS	0.00259	0.000575	3.62035	-1.24652	1.14778
231728_at	CAPS	2.12e-05	2.27e-06	5.1861	4.09092	1.18653
224370_s_at	CAPS2	0.00832	0.00236	-3.16409	-2.57442	-1.02044
236085_at	CAPSL	8.48e-15	1.07e-16	11.113	27.6217	4.14151
1555308_at	CARD14	1.21e-10	3.81e-12	8.49071	17.2074	2.87743
1566134_at	CARHSP1	0.00109	0.000206	-3.93269	-0.269433	-1.25642
240982_at	CARS	1.05e-12	2.11e-14	-9.77246	22.3671	-1.40878
241047_at	CASC15	8.6e-05	1.1e-05	-4.76242	2.54971	-1.02733
238698_at	CASK	3.53e-06	3.07e-07	-5.70445	6.0475	-1.12243
1569737_a_at	CASKIN1	2.54e-07	1.67e-08	-6.43577	8.90566	-1.45553
1552689_at	CASKIN1	0.00294	0.000668	3.57352	-1.38844	1.39045
211367_s_at	CASP1	2.49e-08	1.32e-09	-7.06284	11.4157	-1.31569
211368_s_at	CASP1	0.000401	6.44e-05	-4.27145	0.845489	-1.26398
206011_at	CASP1	2.21e-05	2.37e-06	-5.17391	4.0458	-1.11332
211888_x_at	CASP10	0.000428	6.94e-05	4.25017	0.77389	1.04206
213596_at	CASP4	1.23e-10	3.87e-12	-8.48686	17.1918	-1.39331
1570001_at	CASP8AP2	3.1e-07	2.09e-08	-6.3802	8.6854	-1.70058
211384_s_at	CASR	1.52e-06	1.2e-07	5.94163	6.96384	2.23647
243386_at	CASZ1	8.78e-07	6.59e-08	6.09353	7.55644	1.23539
1560625_s_at	CATIP-AS1	2.83e-10	9.81e-12	8.25935	16.2682	2.14918
221316_at	CATSPERG	0.00833	0.00236	3.16395	-2.5748	1.24362
234705_at	CATX-1	0.00511	0.0013	3.36138	-2.01559	1.11664
203065_s_at	CAV1	4.62e-09	2.1e-10	-7.51162	13.231	-2.77965
212097_at	CAV1	1.57e-07	9.9e-09	-6.56609	9.42385	-2.33484
203324_s_at	CAV2	0.000169	2.38e-05	-4.55115	1.80457	-1.90386
203323_at	CAV2	7.54e-07	5.54e-08	-6.13717	7.72744	-1.83617
208204_s_at	CAV3	0.001	0.000186	3.96234	-0.174024	1.0707
1552354_at	CBARP	0.00125	0.000243	3.8828	-0.428923	1.34161
205747_at	CBLN1	2.39e-09	1.01e-10	-7.68943	13.9526	-1.599
242524_at	CBLN4	8.84e-09	4.29e-10	-7.33725	12.5245	-2.08767
1553693_s_at	CBR4	1.09e-09	4.29e-11	-7.89926	14.805	-1.56541
212816_s_at	CBS	3.14e-09	1.37e-10	7.61557	13.6528	2.04456
1553972_a_at	CBS	1.87e-07	1.2e-08	6.5185	9.23437	2.07277
240084_at	CBX2	9.18e-07	6.92e-08	6.08122	7.50827	1.03704
226473_at	CBX2	1.95e-06	1.58e-07	5.87242	6.69523	1.4284
241712_at	CBY3	0.000391	6.24e-05	-4.28051	0.876024	-1.35344
243534_at	CC2D2B	0.00534	0.00137	3.3432	-2.0681	1.27154
239014_at	CCAR1	2.73e-10	9.44e-12	-8.26866	16.306	-2.09365
243805_at	CCBE1	7.12e-09	3.39e-10	-7.3946	12.7567	-1.54328
222890_at	CCDC113	0.0152	0.00496	2.90866	-3.26064	1.08977
1555792_a_at	CCDC116	6.32e-11	1.85e-12	8.66694	17.9219	1.31489
1554022_at	CCDC13	2.84e-09	1.23e-10	-7.64142	13.7577	-1.3817
230339_at	CCDC138	1.97e-08	1.02e-09	7.12474	11.6654	1.75681
1553485_at	CCDC140	0.0314	0.0123	2.57579	-4.08712	1.15592
1564360_a_at	CCDC144NL-AS1	1.03e-05	1.01e-06	-5.39819	4.88305	-1.51751
227091_at	CCDC146	0.000872	0.000158	4.01029	-0.018869	1.47238
231504_at	CCDC148	5.63e-05	6.8e-06	-4.89365	3.02074	-1.52584
1553839_at	CCDC149	0.00729	0.00201	3.21846	-2.42286	1.06498
230807_at	CCDC151	0.00354	0.000834	3.50382	-1.59741	1.2737
1566665_at	CCDC168	4.17e-07	2.9e-08	6.29912	8.36482	1.99144
1558160_at	CCDC171	1.84e-08	9.51e-10	-7.1425	11.7371	-1.11383
1558094_s_at	CCDC174	6.42e-05	7.89e-06	-4.8535	2.87596	-1.05522
220887_at	CCDC177	1.09e-08	5.37e-10	7.28252	12.303	2.78229
209479_at	CCDC28A	0.000299	4.58e-05	-4.36798	1.17276	-1.03719
1569690_at	CCDC36	1.6e-06	1.27e-07	5.9275	6.9089	1.26796
1564600_a_at	CCDC36	9.35e-15	1.19e-16	11.0858	27.5169	1.4052
226713_at	CCDC50	7.7e-10	2.92e-11	-7.99286	15.1854	-1.20716
1554554_at	CCDC57	3.54e-11	9.81e-13	8.823	18.5536	1.53333
204716_at	CCDC6	0.00617	0.00164	3.28503	-2.23475	1.08043
1554117_at	CCDC60	2.62e-26	1.92e-29	-19.9191	56.6513	-4.05
220180_at	CCDC68	1.22e-05	1.22e-06	-5.34915	4.6988	-1.48714
212886_at	CCDC69	3.72e-09	1.65e-10	-7.57018	13.4686	-2.09255
1553102_a_at	CCDC69	6.74e-10	2.53e-11	-8.02822	15.3291	-1.44035
220749_at	CCDC7	0.00381	0.000913	3.47494	-1.68315	1.58564
225242_s_at	CCDC80	2.21e-07	1.44e-08	-6.47293	9.05319	-2.80641
223300_s_at	CCDC82	1.35e-10	4.3e-12	-8.46083	17.0862	-1.49628
213250_at	CCDC85B	0.000145	2e-05	4.5998	1.97466	1.28116
203119_at	CCDC86	2.42e-05	2.63e-06	5.14635	3.94389	1.00124
227228_s_at	CCDC88C	7.12e-09	3.39e-10	7.3947	12.7571	1.97078
218175_at	CCDC92	0.000607	0.000104	-4.13371	0.38566	-1.03781
243282_at	CCDC93	0.0347	0.0139	2.52762	-4.20002	1.02422
238682_at	CCDC96	9.99e-08	6.05e-09	6.6876	9.90878	1.92307
211174_s_at	CCKAR	0.0147	0.00475	2.92381	-3.22118	1.22861
216714_at	CCL13	0.00815	0.0023	3.17271	-2.55052	1.21327
32128_at	CCL18	0.000474	7.8e-05	-4.21661	0.661394	-2.80365
205476_at	CCL20	0.00915	0.00265	3.12498	-2.68229	1.06316
206988_at	CCL25	0.00922	0.00268	3.12183	-2.69092	1.10848
223710_at	CCL26	0.00763	0.00212	3.19996	-2.47464	1.23652
238750_at	CCL28	0.000337	5.25e-05	4.32966	1.04236	1.21105
208075_s_at	CCL7	1.54e-08	7.85e-10	-7.18949	11.9269	-1.1832
205899_at	CCNA1	0.000221	3.24e-05	4.46587	1.5087	1.94637
203418_at	CCNA2	0.000176	2.5e-05	4.53752	1.7571	1.38886
213226_at	CCNA2	8.01e-08	4.75e-09	6.74756	10.1487	1.602
214710_s_at	CCNB1	3.82e-07	2.64e-08	6.32239	8.45672	1.92939
228729_at	CCNB1	1.26e-07	7.77e-09	6.62607	9.663	2.08621
202705_at	CCNB2	2.95e-08	1.59e-09	7.01665	11.2296	2.12791
1569126_at	CCNC	6.19e-05	7.57e-06	-4.86478	2.91657	-1.01262
208712_at	CCND1	0.00122	0.000235	3.89345	-0.394975	1.54902
208711_s_at	CCND1	1.97e-05	2.09e-06	5.20725	4.16934	1.72795
200953_s_at	CCND2	2.18e-05	2.34e-06	-5.17792	4.06065	-2.02854
200951_s_at	CCND2	0.000317	4.91e-05	-4.34875	1.10727	-1.37005
223084_s_at	CCNDBP1	0.00058	9.83e-05	-4.14973	0.438709	-1.02103
213523_at	CCNE1	3.85e-08	2.11e-09	6.94699	10.9492	1.81353
205034_at	CCNE2	1.34e-06	1.05e-07	5.97699	7.10139	1.7614
228081_at	CCNG2	5.02e-11	1.44e-12	-8.72928	18.1743	-1.50442
221427_s_at	CCNL2	9.58e-05	1.25e-05	-4.72893	2.43047	-1.32687
222999_s_at	CCNL2	2.14e-07	1.39e-08	-6.48198	9.08915	-1.2517
210021_s_at	CCNO	0.00163	0.000331	3.78991	-0.72247	1.04214
205098_at	CCR1	0.00626	0.00167	-3.27933	-2.25094	-1.01351
211434_s_at	CCRL2	0.00745	0.00206	3.20996	-2.44668	1.19182
209378_s_at	CCSER2	0.000215	3.14e-05	4.47433	1.53794	1.17407
208696_at	CCT5	0.0123	0.00382	3.00027	-3.01954	1.00154
220508_at	CCT8L2	1.08e-05	1.06e-06	5.38437	4.83106	2.06355
229900_at	CD109	0.0012	0.000231	3.89822	-0.379766	1.16133
201743_at	CD14	0.000322	4.99e-05	-4.344	1.09108	-1.46755
203645_s_at	CD163	0.00035	5.5e-05	-4.31655	0.9979	-1.60556
215049_x_at	CD163	0.000314	4.85e-05	-4.35217	1.11888	-1.36743
206206_at	CD180	1.01e-14	1.3e-16	-11.0615	27.4233	-1.46531
210325_at	CD1A	3.96e-06	3.48e-07	5.67163	5.92166	2.07187
206749_at	CD1B	0.0337	0.0134	-2.54139	-4.16793	-1.01054
209583_s_at	CD200	0.0133	0.00421	-2.96626	-3.10972	-1.1813
1553395_a_at	CD200R1	1.04e-07	6.34e-09	6.67624	9.86337	1.1379
220428_at	CD207	0.0278	0.0105	2.63418	-3.94794	1.0173
209771_x_at	CD24	8.76e-14	1.38e-15	10.4583	25.0778	3.14134
216379_x_at	CD24	9.17e-14	1.45e-15	10.4467	25.0321	3.23773
208651_x_at	CD24	4.37e-12	1.01e-13	9.38366	20.8127	3.57262
209772_s_at	CD24	1.33e-11	3.37e-13	9.08592	19.6152	3.6931
266_s_at	CD24	1.11e-14	1.43e-16	11.0371	27.329	3.87615
208650_s_at	CD24	2.83e-17	1.99e-19	12.7779	33.8649	5.89417
211861_x_at	CD28	1.95e-12	4.16e-14	-9.60311	21.6914	-2.28065
211856_x_at	CD28	8.58e-18	5.4e-20	-13.1362	35.1632	-1.60554
206545_at	CD28	8.51e-09	4.11e-10	-7.34773	12.5669	-1.35425
217078_s_at	CD300A	4.72e-16	4.43e-18	-11.9454	30.7858	-2.61537
209933_s_at	CD300A	0.0183	0.00628	2.82433	-3.4775	1.02459
1554175_at	CD300LB	0.00249	0.000549	3.63501	-1.20181	1.04179
206488_s_at	CD36	0.00068	0.000119	-4.09518	0.258584	-1.07054
205456_at	CD3E	0.00274	0.000616	3.59912	-1.31102	1.13537
212063_at	CD44	0.00586	0.00154	-3.30566	-2.17587	-1.13889
211075_s_at	CD47	0.00983	0.0029	3.09515	-2.7639	1.05162
211900_x_at	CD6	1.6e-05	1.66e-06	5.2682	4.39607	1.97503
1567628_at	CD74	0.0002	2.88e-05	-4.49804	1.61997	-1.4897
1555779_a_at	CD79A	1.99e-09	8.29e-11	-7.73847	14.1518	-1.99409
205049_s_at	CD79A	0.000666	0.000116	-4.10264	0.283144	-1.22506
207176_s_at	CD80	3.85e-09	1.72e-10	7.56093	13.431	1.9981
203904_x_at	CD82	1.99e-05	2.12e-06	5.20395	4.15708	1.20715
244352_at	CD84	7.47e-18	4.69e-20	-13.1751	35.3031	-1.7207
210895_s_at	CD86	1.08e-09	4.23e-11	-7.90251	14.8182	-1.97746
205686_s_at	CD86	1.67e-05	1.74e-06	-5.25553	4.34885	-1.16392
205758_at	CD8A	0.000384	6.11e-05	4.28637	0.895807	1.2037
230037_at	CD8B	0.00168	0.000344	3.77836	-0.758668	1.71866
233322_at	CD9	0.000316	4.88e-05	4.35032	1.11258	1.13735
223041_at	CD99L2	3.85e-09	1.72e-10	-7.56035	13.4287	-2.10556
210742_at	CDC14A	4.16e-10	1.49e-11	-8.15742	15.8541	-1.45697
205288_at	CDC14A	0.000141	1.94e-05	-4.60864	2.00566	-1.28525
210441_at	CDC14A	8.59e-07	6.43e-08	6.09988	7.58131	1.74235
209659_s_at	CDC16	4.52e-06	4.02e-07	-5.63497	5.78135	-1.34009
202870_s_at	CDC20	8.6e-09	4.16e-10	7.34499	12.5558	2.62935
1553655_at	CDC20B	2.81e-05	3.11e-06	5.10261	3.78265	1.44883
240161_s_at	CDC20B	0.0064	0.00172	3.26995	-2.27759	1.95186
1555772_a_at	CDC25A	5.53e-07	3.94e-08	6.22227	8.06184	1.31274
204695_at	CDC25A	1.26e-07	7.81e-09	6.62461	9.65717	1.514
205167_s_at	CDC25C	7.4e-08	4.34e-09	6.76952	10.2367	1.27112
213595_s_at	CDC42BPA	1.31e-13	2.13e-15	10.3479	24.6446	1.35015
209288_s_at	CDC42EP3	0.00308	0.000708	-3.55545	-1.44289	-1.05394
204126_s_at	CDC45	1.67e-07	1.06e-08	6.54852	9.35386	1.33005
203967_at	CDC6	0.00084	0.000152	4.02309	0.022757	1.04408
203968_s_at	CDC6	2.62e-06	2.2e-07	5.78921	6.37362	1.22001
204510_at	CDC7	0.000262	3.92e-05	4.41177	1.32254	1.37373
226661_at	CDCA2	0.000455	7.43e-05	4.23064	0.708348	1.14927
236957_at	CDCA2	3.72e-05	4.26e-06	5.01889	3.47568	1.21657
221436_s_at	CDCA3	0.00171	0.000351	3.77213	-0.778153	1.14402
223307_at	CDCA3	0.000249	3.72e-05	4.42717	1.37542	1.29215
218399_s_at	CDCA4	5.22e-08	2.95e-09	6.86449	10.6176	1.00607
224753_at	CDCA5	3.33e-10	1.17e-11	8.21642	16.0938	2.24891
224428_s_at	CDCA7	1.4e-09	5.64e-11	7.83246	14.5336	2.29775
221520_s_at	CDCA8	6.5e-05	8.01e-06	4.84955	2.86178	1.20156
207173_x_at	CDH11	0.00111	0.000211	-3.92542	-0.292756	-1.5767
239286_at	CDH11	4.83e-05	5.72e-06	-4.93987	3.18804	-1.51168
207172_s_at	CDH11	3.62e-05	4.13e-06	-5.02732	3.5065	-1.15941
236179_at	CDH11	0.00225	0.000487	-3.67203	-1.08847	-1.04881
207149_at	CDH12	0.0199	0.00695	2.7873	-3.57114	1.11272
209847_at	CDH17	0.00348	0.000818	-3.50989	-1.57933	-1.49786
210601_at	CDH6	0.00416	0.00102	3.44108	-1.78308	1.15223
210602_s_at	CDH6	4.21e-06	3.72e-07	5.6548	5.85721	1.17921
232631_at	CDH6	0.0108	0.00326	3.055	-2.87279	1.36671
214803_at	CDH6	2.84e-05	3.14e-06	5.10002	3.77314	1.6847
205533_s_at	CDH6	9.97e-09	4.9e-10	7.30465	12.3925	2.22667
205532_s_at	CDH6	2.06e-06	1.68e-07	5.85764	6.63802	2.53492
220074_at	CDHR5	5.13e-10	1.87e-11	-8.10166	15.6275	-1.63909
203214_x_at	CDK1	3.84e-05	4.42e-06	5.00926	3.44052	1.39778
210559_s_at	CDK1	7.06e-05	8.8e-06	4.82398	2.76991	1.61876
203213_at	CDK1	6.83e-09	3.24e-10	7.40597	12.8028	2.77124
1556654_at	CDK12	3.94e-05	4.54e-06	-5.00207	3.41428	-1.54283
208824_x_at	CDK16	0.00213	0.000456	3.69198	-1.02703	1.05086
207239_s_at	CDK16	5.33e-06	4.82e-07	5.58824	5.60298	1.15505
206474_at	CDK17	2.86e-17	2.02e-19	-12.7738	33.8501	-2.15667
235226_at	CDK19	8.7e-11	2.65e-12	-8.57961	17.568	-1.42664
204252_at	CDK2	8.61e-08	5.13e-09	-6.72826	10.0714	-1.02532
204996_s_at	CDK5R1	0.015	0.00489	2.91332	-3.24853	1.00955
224847_at	CDK6	0.00211	0.000452	-3.69511	-1.01738	-1.51186
224851_at	CDK6	0.0215	0.00765	-2.75229	-3.65879	-1.34701
207143_at	CDK6	0.00389	0.000937	3.46679	-1.70728	1.11096
1561026_a_at	CDKAL1	1.2e-14	1.57e-16	-11.0143	27.2411	-1.35686
236331_at	CDKL2	3.07e-06	2.63e-07	-5.74398	6.19939	-1.26712
207039_at	CDKN2A	0.00227	0.000491	3.66927	-1.09694	1.65826
1555758_a_at	CDKN3	9.9e-06	9.58e-07	5.41108	4.9316	1.25043
209714_s_at	CDKN3	6.29e-06	5.79e-07	5.54121	5.42399	1.73342
243706_at	CDO1	5.63e-06	5.12e-07	5.573	5.54493	1.52438
227526_at	CDON	4.44e-13	8.18e-15	-10.0094	23.3085	-2.78011
228456_s_at	CDS2	4.54e-15	5.31e-17	-11.2939	28.3161	-1.39589
228868_x_at	CDT1	0.00171	0.00035	3.7733	-0.774505	1.4637
227290_at	CDYL2	0.00154	0.00031	3.80984	-0.659879	1.14739
230504_at	CEACAM19	0.0136	0.00431	2.95774	-3.13218	1.17961
203757_s_at	CEACAM6	0.0211	0.00747	2.76106	-3.63691	1.05668
206198_s_at	CEACAM7	5.67e-08	3.23e-09	-6.8423	10.5285	-1.12851
206676_at	CEACAM8	0.000342	5.34e-05	-4.32452	1.02492	-1.01852
220465_at	CEBPA-AS1	1.02e-09	4e-11	7.91621	14.8739	1.9962
213006_at	CEBPD	0.00196	0.000412	-3.72309	-0.930853	-1.02066
225527_at	CEBPG	2.98e-05	3.31e-06	5.08579	3.7208	1.11617
204203_at	CEBPG	0.00046	7.53e-05	4.22656	0.694691	1.11802
235865_at	CELF1	4.55e-09	2.07e-10	7.51554	13.2469	2.49954
202156_s_at	CELF2	2.7e-10	9.31e-12	-8.27205	16.3198	-2.49435
202157_s_at	CELF2	7.3e-08	4.27e-09	-6.77359	10.253	-2.25571
202158_s_at	CELF2	8.24e-11	2.49e-12	-8.59412	17.6268	-2.02656
227178_at	CELF2	4.49e-14	6.71e-16	-10.6416	25.7945	-1.24845
206817_x_at	CELF3	1.12e-08	5.59e-10	7.27262	12.2629	2.39493
238966_at	CELF4	0.000148	2.04e-05	4.59374	1.95341	1.03255
223654_s_at	CELF4	0.00324	0.000751	3.53661	-1.49943	1.13176
232416_at	CELF5	0.00634	0.0017	3.27393	-2.26629	1.18991
227775_at	CELF6	2.18e-07	1.42e-08	-6.47702	9.06944	-1.10388
204539_s_at	CELSR1	0.00398	0.000962	3.45833	-1.73226	1.1452
36499_at	CELSR2	4.41e-05	5.15e-06	4.96812	3.29064	1.02692
40020_at	CELSR3	1.95e-10	6.47e-12	-8.36101	16.681	-1.43473
216116_at	CELSR3-AS1	0.00694	0.00189	3.23992	-2.36536	1.28923
212942_s_at	CEMIP	1.62e-06	1.3e-07	5.92301	6.89146	1.5414
222694_at	CENPBD1P1	0.0126	0.00391	2.9918	-3.04206	1.05935
205046_at	CENPE	1.77e-06	1.43e-07	5.89822	6.79524	1.57146
207828_s_at	CENPF	1.43e-07	9e-09	6.58977	9.51821	2.32862
209172_s_at	CENPF	1.05e-10	3.27e-12	8.52765	17.3573	2.9317
231772_x_at	CENPH	0.00142	0.000282	3.83897	-0.567998	1.09864
222848_at	CENPK	9.49e-09	4.64e-10	7.31827	12.4476	2.25999
218741_at	CENPM	2.59e-09	1.11e-10	7.66768	13.8643	1.95188
219555_s_at	CENPN	3.98e-06	3.5e-07	5.67079	5.91843	1.24395
228559_at	CENPN	0.000571	9.66e-05	4.15469	0.455152	1.89982
226118_at	CENPO	2.83e-11	7.66e-13	8.88358	18.7985	2.11646
229305_at	CENPU	0.00209	0.000446	3.69922	-1.0047	1.44871
218883_s_at	CENPU	9.72e-08	5.87e-09	6.6952	9.93918	2.07509
226936_at	CENPW	0.0001	1.31e-05	4.71567	2.38336	1.28082
204074_s_at	CEP104	2.18e-07	1.41e-08	-6.47797	9.07323	-1.16871
226449_at	CEP120	1.28e-06	9.98e-08	-5.98915	7.14874	-1.3928
206005_s_at	CEP162	3.34e-13	5.96e-15	-10.0892	23.6242	-1.78299
213242_x_at	CEP170B	1.56e-06	1.24e-07	5.93382	6.93347	1.26374
1556850_at	CEP290	2.59e-12	5.62e-14	-9.52845	21.3929	-1.15498
225485_at	CEP41	7.85e-10	2.99e-11	7.98758	15.1639	1.69289
231850_x_at	CEP44	3.36e-12	7.51e-14	-9.45665	21.1054	-1.75173
218542_at	CEP55	1.31e-10	4.15e-12	8.46981	17.1226	2.97779
1560418_at	CEP57L1	8.09e-07	6.01e-08	-6.11659	7.64676	-1.2027
212677_s_at	CEP68	1.95e-13	3.29e-15	-10.2383	24.213	-2.31378
1554488_at	CEP70	3e-30	1.04e-33	-23.6346	66.2326	-3.5101
219036_at	CEP70	2.16e-05	2.32e-06	5.18021	4.06912	1.12945
1554489_a_at	CEP70	1.73e-05	1.81e-06	5.24486	4.30911	1.21078
228774_at	CEP78	6.25e-08	3.59e-09	-6.8162	10.4238	-1.14641
232444_at	CEP85L	9.77e-05	1.28e-05	4.72299	2.40936	2.33715
236327_at	CEPT1	0.000266	3.99e-05	-4.40699	1.30618	-1.06456
1561884_at	CEPT1	6.14e-05	7.5e-06	4.86735	2.92585	1.88728
218421_at	CERK	4.44e-06	3.95e-07	-5.63967	5.79932	-1.05622
222212_s_at	CERS2	3.74e-06	3.27e-07	5.68817	5.98504	1.21403
242019_at	CERS6	8.44e-07	6.3e-08	-6.10481	7.60061	-1.02301
209668_x_at	CES2	8.71e-14	1.37e-15	-10.4602	25.0852	-1.87875
1553465_a_at	CES5A	4.62e-13	8.58e-15	-9.99756	23.2614	-1.26623
207209_at	CETN1	0.00118	0.000227	3.90321	-0.363827	1.21497
1557866_at	CFAP157	0.0247	0.00909	2.68881	-3.81544	1.24301
243237_at	CFAP221	2.35e-08	1.24e-09	-7.07711	11.4733	-1.92641
231043_at	CFAP221	1.99e-08	1.04e-09	-7.12169	11.6531	-1.00416
243896_at	CFAP43	1.45e-06	1.14e-07	-5.95505	7.016	-1.5854
239916_at	CFAP52	0.00358	0.000844	-3.49998	-1.60882	-1.0862
1552325_at	CFAP53	3.87e-05	4.46e-06	-5.00687	3.4318	-1.3315
1556969_at	CFAP65	7.81e-05	9.87e-06	4.79293	2.65866	1.59236
215849_x_at	CFAP70	0.0154	0.00507	2.90095	-3.28067	1.16673
205382_s_at	CFD	2.49e-07	1.64e-08	-6.44049	8.9244	-1.43581
213800_at	CFH	1.75e-06	1.41e-07	-5.90174	6.80891	-2.54309
206910_x_at	CFHR2	9.26e-10	3.59e-11	-7.94289	14.9823	-2.37602
1554459_s_at	CFHR3	7.06e-05	8.79e-06	-4.82431	2.77108	-1.0187
1555564_a_at	CFI	5.57e-11	1.62e-12	-8.70022	18.0566	-2.43083
203854_at	CFI	7.3e-05	9.13e-06	-4.8139	2.73377	-1.4334
233496_s_at	CFL2	8.53e-05	1.09e-05	-4.76506	2.55911	-1.88175
224352_s_at	CFL2	2.22e-05	2.39e-06	-5.17245	4.04038	-1.20395
239629_at	CFLAR	1.43e-12	2.94e-14	-9.69015	22.039	-2.47403
214618_at	CFLAR	0.04	0.0166	2.45765	-4.36087	1.1243
205043_at	CFTR	0.00529	0.00136	3.34631	-2.05913	1.48009
235117_at	CHAC2	0.000152	2.11e-05	4.58528	1.9238	1.15908
226194_at	CHAMP1	3.04e-10	1.06e-11	-8.23936	16.187	-1.41903
224932_at	CHCHD10	2.37e-05	2.57e-06	5.15289	3.96805	1.21203
222701_s_at	CHCHD7	0.000455	7.43e-05	4.23042	0.707621	1.30185
244848_at	CHD1L	0.035	0.0141	2.52343	-4.20975	1.16037
1554015_a_at	CHD2	2.91e-09	1.27e-10	-7.63525	13.7326	-1.2618
243751_at	CHD2	1.02e-06	7.77e-08	-6.05232	7.39525	-1.09723
201184_s_at	CHD4	0.000117	1.56e-05	4.66872	2.21715	1.10906
218829_s_at	CHD7	2.07e-07	1.34e-08	6.49104	9.12518	1.58821
239654_at	CHD9	4.53e-17	3.38e-19	-12.6347	33.3415	-2.07163
220586_at	CHD9	2.28e-17	1.59e-19	-12.8399	34.0909	-2.02031
235388_at	CHD9	3.62e-08	1.98e-09	-6.96289	11.0131	-1.94452
229586_at	CHD9	2.26e-07	1.47e-08	-6.4674	9.03125	-1.38164
242157_at	CHD9	0.0125	0.0039	2.99247	-3.04028	1.16866
229954_at	CHDH	1.8e-14	2.48e-16	10.8959	26.7831	1.59287
238075_at	CHEK1	0.000358	5.65e-05	4.30892	0.972053	1.18616
205393_s_at	CHEK1	0.000197	2.84e-05	4.50273	1.63624	1.1911
205394_at	CHEK1	8.05e-06	7.64e-07	5.46961	5.15254	1.27177
204697_s_at	CHGA	0.00054	9.04e-05	-4.17387	0.518853	-2.05543
204260_at	CHGB	8.55e-21	2.69e-23	-15.3173	42.7021	-3.61206
219492_at	CHIC2	1.94e-13	3.27e-15	-10.2399	24.2194	-1.47587
204266_s_at	CHKA	2.03e-08	1.06e-09	7.11617	11.6308	1.13635
226350_at	CHML	0.0103	0.00306	3.07588	-2.8163	1.01877
218178_s_at	CHMP1B	0.013	0.0041	2.97554	-3.0852	1.011
218177_at	CHMP1B	0.00293	0.000664	3.57566	-1.38198	1.04269
226803_at	CHMP4C	6.86e-05	8.52e-06	4.83287	2.80183	1.58906
207993_s_at	CHP1	0.0236	0.00858	2.7101	-3.76323	1.37808
55093_at	CHPF2	1.32e-05	1.33e-06	-5.32543	4.60991	-1.22639
231764_at	CHRAC1	6.8e-05	8.43e-06	4.83565	2.81181	1.41375
209763_at	CHRDL1	7.04e-15	8.6e-17	-11.1689	27.8365	-3.78419
207868_at	CHRNA2	7.89e-10	3e-11	7.98649	15.1595	1.67048
210221_at	CHRNA3	0.0208	0.00734	2.76745	-3.62094	1.21136
207859_s_at	CHRNB3	3.16e-12	7.03e-14	-9.47303	21.171	-1.94117
242124_at	CHST1	2.26e-21	6.32e-24	-15.7533	44.1347	-1.95671
205567_at	CHST1	0.00388	0.000933	3.46792	-1.70395	1.15622
226314_at	CHST14	4.16e-13	7.61e-15	10.0276	23.3806	1.85394
203066_at	CHST15	0.00114	0.000218	-3.91544	-0.324703	-1.04093
223786_at	CHST6	0.00212	0.000452	3.69481	-1.01833	1.17711
203044_at	CHSY1	2.34e-06	1.94e-07	5.82106	6.49657	1.0262
202559_x_at	CHTOP	3.1e-22	6.97e-25	16.4315	46.3152	2.80932
201953_at	CIB1	4.08e-05	4.72e-06	4.99158	3.37603	1.65242
200811_at	CIRBP	6.94e-05	8.63e-06	-4.82924	2.78877	-1.18504
209357_at	CITED2	0.00111	0.000211	-3.92488	-0.294472	-1.22654
1554264_at	CKAP2	1.17e-05	1.16e-06	5.36189	4.74661	1.03657
200884_at	CKB	1.55e-07	9.8e-09	6.56856	9.43365	1.16167
201897_s_at	CKS1B	8.2e-05	1.05e-05	4.77722	2.60251	1.50351
204170_s_at	CKS2	6.37e-09	3e-10	7.42453	12.878	2.35282
204978_at	CLASRP	0.00045	7.33e-05	4.2342	0.720281	1.27485
220026_at	CLCA4	1.1e-05	1.08e-06	5.38094	4.81814	1.11813
205148_s_at	CLCN4	0.00158	0.000321	3.79948	-0.692457	1.44392
1554749_s_at	CLCNKB	0.00415	0.00101	3.4421	-1.78007	1.01962
205328_at	CLDN10	4.62e-06	4.12e-07	5.6286	5.757	2.54915
228335_at	CLDN11	5.37e-06	4.87e-07	-5.58574	5.59347	-2.43925
1552845_at	CLDN15	1.23e-20	4.09e-23	-15.1926	42.2879	-2.80762
219640_at	CLDN15	0.000146	2.01e-05	-4.59798	1.96827	-1.09349
220332_at	CLDN16	2.36e-05	2.55e-06	5.15469	3.97471	1.02024
221328_at	CLDN17	4.12e-05	4.76e-06	-4.98894	3.36644	-1.30519
1554804_a_at	CLDN19	3.57e-07	2.45e-08	6.34098	8.53021	1.54591
228707_at	CLDN23	4.64e-05	5.47e-06	-4.95227	3.23304	-1.45836
228704_s_at	CLDN23	4.62e-05	5.43e-06	4.95397	3.23923	2.75283
203953_s_at	CLDN3	8.01e-12	1.93e-13	9.22269	20.166	3.25119
203954_x_at	CLDN3	6.32e-15	7.64e-17	11.1996	27.9544	3.66536
201428_at	CLDN4	2.82e-12	6.22e-14	9.50367	21.2937	2.18741
237810_at	CLDN6	0.00407	0.000986	3.45033	-1.75585	1.0468
202790_at	CLDN7	1.11e-07	6.76e-09	6.66054	9.80064	1.54825
1552398_a_at	CLEC12A	1.11e-08	5.51e-10	-7.27612	12.2771	-2.20354
231221_at	CLEC16A	0.000131	1.78e-05	4.63107	2.08447	1.25829
219761_at	CLEC1A	1.16e-06	9.02e-08	6.01471	7.24842	1.87938
219947_at	CLEC4A	2.74e-05	3.02e-06	-5.11056	3.81193	-1.54153
207995_s_at	CLEC4M	3.06e-19	1.39e-21	-14.1641	38.7937	-3.7084
210481_s_at	CLEC4M	6.03e-19	2.94e-21	-13.9502	38.0496	-3.24492
221698_s_at	CLEC7A	0.00508	0.00129	-3.36354	-2.00933	-1.15514
1554406_a_at	CLEC7A	0.0204	0.00716	2.77657	-3.59809	1.0032
244413_at	CLECL1	5.92e-06	5.41e-07	-5.55873	5.49062	-1.19288
205830_at	CLGN	0.0198	0.00692	2.78926	-3.56621	1.25078
213415_at	CLIC2	2.73e-06	2.3e-07	-5.77797	6.33029	-1.41697
213317_at	CLIC5	0.00766	0.00213	-3.19828	-2.47934	-1.30232
201768_s_at	CLINT1	0.000451	7.35e-05	4.23355	0.718105	1.2796
226425_at	CLIP4	3.93e-06	3.45e-07	-5.67387	5.93024	-1.75949
203229_s_at	CLK2	4.4e-19	2.11e-21	14.0448	38.3796	2.40829
238072_at	CLK3	0.0118	0.00363	3.01725	-2.97424	1.31207
241403_at	CLK4	9.55e-13	1.89e-14	-9.7995	22.4747	-1.59969
228751_at	CLK4	6.4e-05	7.87e-06	-4.85425	2.87868	-1.12442
226834_at	CLMP	7.16e-10	2.7e-11	-8.01244	15.2649	-2.51301
204085_s_at	CLN5	0.000579	9.8e-05	-4.15058	0.441503	-1.05408
1567076_at	CLN6	0.0055	0.00143	3.33081	-2.10375	1.03558
1567080_s_at	CLN6	0.00278	0.000625	3.59462	-1.32464	1.22102
221845_s_at	CLPB	5.01e-11	1.44e-12	8.72957	18.1755	3.77916
1555695_a_at	CLRN1	0.0313	0.0122	2.57795	-4.08202	1.24605
1553120_at	CLSPN	2.49e-05	2.71e-06	5.13844	3.91468	1.51374
219414_at	CLSTN2	1.62e-07	1.03e-08	6.55717	9.38828	2.12907
1560434_x_at	CLTA	0.00105	0.000197	3.94522	-0.229154	1.23627
210498_at	CLTC	1.36e-13	2.23e-15	-10.3369	24.601	-2.26829
220855_at	CLTC-IT1	7.94e-21	2.47e-23	-15.3428	42.7867	-3.07733
212456_at	CLUH	3.65e-18	2.13e-20	13.3938	36.086	2.42009
1563245_at	CLYBL-AS2	1.07e-15	1.09e-17	-11.7065	29.8861	-2.1125
205518_s_at	CMAHP	4.51e-16	4.22e-18	-11.9578	30.8322	-2.92224
229604_at	CMAHP	2.56e-12	5.57e-14	-9.53096	21.4029	-1.78931
210571_s_at	CMAHP	3.57e-05	4.07e-06	-5.03128	3.52099	-1.12829
218447_at	CMC2	1.44e-06	1.14e-07	5.95571	7.01859	1.24362
224992_s_at	CMIP	7.31e-08	4.28e-09	6.7731	10.251	1.49847
1555738_at	CMTM1	4.12e-10	1.47e-11	-8.16042	15.8663	-1.24576
224733_at	CMTM3	0.00148	0.000297	-3.82298	-0.618485	-1.04943
1555704_at	CMTM3	0.0106	0.00319	3.06242	-2.85275	1.19987
225009_at	CMTM4	4.03e-09	1.81e-10	-7.54813	13.3791	-1.19699
217947_at	CMTM6	0.00519	0.00133	3.35477	-2.03472	1.05632
223047_at	CMTM6	0.00242	0.00053	3.64582	-1.1688	1.13302
226017_at	CMTM7	1.52e-05	1.56e-06	5.28339	4.45274	1.55909
235099_at	CMTM8	3.25e-07	2.21e-08	6.36676	8.63221	1.50377
1552587_at	CNBD1	1.01e-06	7.7e-08	6.05462	7.40426	2.6671
230950_at	CNDP2	0.000147	2.03e-05	4.59489	1.95745	1.51555
222721_at	CNIH4	2.41e-05	2.62e-06	-5.14818	3.95066	-1.05676
228437_at	CNIH4	0.0148	0.00481	2.91896	-3.23383	1.29706
229116_at	CNKSR2	1.93e-05	2.04e-06	-5.21368	4.19322	-1.69114
203951_at	CNN1	3.81e-12	8.65e-14	-9.42168	20.9652	-2.44871
220166_at	CNNM1	7.07e-06	6.59e-07	-5.50778	5.29709	-1.21459
1554523_a_at	CNNM2	9.42e-07	7.13e-08	6.07389	7.47959	1.78061
224695_at	CNOT11	4.59e-14	6.88e-16	10.6353	25.7699	2.13907
222181_at	CNOT2	6.64e-07	4.82e-08	-6.17201	7.8642	-1.11224
227119_at	CNOT6L	2.89e-05	3.21e-06	-5.09443	3.75256	-1.13754
233019_at	CNOT7	2.59e-12	5.64e-14	-9.52777	21.3901	-2.25198
225053_at	CNOT7	6.74e-09	3.19e-10	7.40948	12.817	1.1666
202162_s_at	CNOT8	1.06e-09	4.18e-11	7.90577	14.8315	1.06634
1553510_s_at	CNOT9	0.000365	5.77e-05	4.30266	0.950866	1.27059
1557943_at	CNP	0.0058	0.00152	3.30974	-2.16421	1.01274
208912_s_at	CNP	0.00116	0.000222	3.9101	-0.341807	1.17604
1559283_a_at	CNPY1	1.83e-25	1.7e-28	-19.1559	54.5088	-2.41245
217700_at	CNPY4	9.41e-05	1.22e-05	4.73447	2.45016	2.18526
213436_at	CNR1	1.09e-06	8.42e-08	-6.03189	7.31547	-3.32458
226751_at	CNRIP1	5.15e-08	2.91e-09	-6.86782	10.631	-1.48912
1554661_s_at	CNST	0.0206	0.00725	2.77192	-3.60976	1.17133
1561590_a_at	CNTFR-AS1	9.66e-07	7.33e-08	-6.06682	7.45194	-1.21636
227202_at	CNTN1	3.36e-07	2.3e-08	-6.35726	8.59462	-2.40949
227209_at	CNTN1	2.59e-09	1.11e-10	-7.66748	13.8635	-2.00581
229831_at	CNTN3	0.0296	0.0114	-2.6028	-4.02306	-1.44845
229084_at	CNTN4	4.72e-09	2.16e-10	-7.50537	13.2057	-2.17453
207452_s_at	CNTN5	5.22e-14	7.9e-16	-10.6001	25.6325	-1.70246
219300_s_at	CNTNAP2	2.92e-09	1.27e-10	-7.63414	13.7282	-1.37072
220436_at	CNTNAP3P2	9.75e-07	7.41e-08	6.06423	7.44182	1.14131
242916_at	CNTRL	3.09e-05	3.45e-06	-5.0752	3.68192	-1.00193
205642_at	CNTRL	0.0111	0.00337	3.04373	-2.90319	1.03733
1552496_a_at	COBL	6.19e-05	7.57e-06	-4.86475	2.91649	-1.04392
229598_at	COBLL1	0.00172	0.000353	-3.77083	-0.782229	-1.0108
205229_s_at	COCH	0.0033	0.000767	3.53027	-1.51843	1.3015
230878_s_at	COG1	4e-13	7.27e-15	10.0392	23.4264	1.38703
243608_at	COG2	1.17e-08	5.83e-10	-7.26222	12.2209	-1.46224
229271_x_at	COL11A1	0.0349	0.014	-2.52414	-4.20809	-1.58574
231879_at	COL12A1	2e-06	1.63e-07	-5.86552	6.66851	-1.7529
233109_at	COL12A1	0.0172	0.00579	2.85308	-3.40412	1.66862
231766_s_at	COL12A1	0.000234	3.45e-05	4.4483	1.44813	2.07049
211343_s_at	COL13A1	5.9e-05	7.17e-06	4.8793	2.96893	1.64188
228750_at	COL14A1	4.01e-08	2.2e-09	-6.93647	10.9069	-2.72195
212865_s_at	COL14A1	0.000184	2.63e-05	-4.52373	1.70915	-2.06344
203477_at	COL15A1	0.00058	9.84e-05	4.14959	0.438222	1.28503
204345_at	COL16A1	0.0103	0.00307	-3.07548	-2.81739	-1.00727
217430_x_at	COL1A1	3.6e-06	3.13e-07	5.69905	6.02679	1.36636
229218_at	COL1A2	0.00156	0.000316	-3.804	-0.678231	-1.28651
208096_s_at	COL21A1	0.000604	0.000103	-4.13572	0.3923	-2.17346
242326_at	COL22A1	2e-06	1.63e-07	-5.86567	6.6691	-1.3521
229168_at	COL23A1	0.000244	3.62e-05	4.43443	1.40038	1.02258
232458_at	COL3A1	6.74e-08	3.9e-09	-6.79594	10.3425	-2.07454
211981_at	COL4A1	0.00462	0.00115	3.40085	-1.90093	1.11396
211980_at	COL4A1	0.000678	0.000118	4.09614	0.261754	1.32807
211966_at	COL4A2	0.00149	0.000298	3.82156	-0.622952	1.01171
211964_at	COL4A2	0.00419	0.00102	3.43856	-1.7905	1.09062
213992_at	COL4A6	4.22e-05	4.9e-06	-4.98123	3.33833	-1.3273
1553834_at	COL6A5	1.1e-09	4.31e-11	-7.89804	14.8	-1.26007
230867_at	COL6A6	3.08e-06	2.64e-07	-5.74292	6.19533	-1.81153
226237_at	COL8A1	0.00124	0.000239	-3.88817	-0.411811	-2.20224
222008_at	COL9A1	6.55e-05	8.08e-06	4.84701	2.85262	1.90209
213622_at	COL9A2	6.92e-05	8.6e-06	4.83015	2.79206	1.03685
232542_at	COL9A2	0.00182	0.000378	3.74977	-0.847924	1.0453
206441_s_at	COMMD4	0.000341	5.33e-05	-4.32518	1.02717	-1.02575
205713_s_at	COMP	0.00691	0.00189	3.23936	-2.3641	1.7664
202142_at	COPS8	6.18e-11	1.81e-12	-8.67322	17.9473	-1.3148
222409_at	CORO1C	1.53e-07	9.66e-09	-6.57224	9.44834	-1.19398
227177_at	CORO2A	5.39e-10	1.97e-11	8.08862	15.5745	1.76649
209789_at	CORO2B	8.87e-08	5.31e-09	-6.72007	10.0387	-1.11469
1556346_at	COTL1	7.85e-08	4.65e-09	-6.75278	10.1696	-1.14597
224583_at	COTL1	0.00108	0.000205	-3.93394	-0.265396	-1.14208
227442_at	COX18	4.68e-07	3.28e-08	-6.26818	8.24273	-1.63226
203663_s_at	COX5A	0.000421	6.8e-05	4.25584	0.792955	1.03054
211025_x_at	COX5B	0.00126	0.000244	3.88228	-0.430582	1.10264
234876_at	COX6A1P1	0.0116	0.00357	3.02379	-2.95672	1.16199
228143_at	CP	0.00997	0.00295	3.08885	-2.78104	1.30718
204846_at	CP	8.29e-10	3.17e-11	7.97319	15.1055	3.03842
227253_at	CP	1.69e-13	2.81e-15	10.2781	24.37	3.85827
1558034_s_at	CP	6.6e-13	1.27e-14	9.90027	22.8754	4.34389
205615_at	CPA1	4.38e-21	1.31e-23	-15.534	43.4172	-2.97644
1552511_a_at	CPA6	2.34e-06	1.94e-07	-5.8209	6.49592	-1.33199
227721_at	CPAMD8	7.36e-05	9.21e-06	4.8116	2.72551	1.00825
205509_at	CPB1	6.81e-16	6.63e-18	-11.8386	30.3842	-3.06803
201116_s_at	CPE	8.06e-05	1.02e-05	-4.78291	2.62286	-1.66014
201117_s_at	CPE	0.00197	0.000415	-3.72109	-0.937039	-1.58954
1560030_at	CPEB1-AS1	3.6e-30	1.38e-33	23.5205	65.9579	3.88451
239765_at	CPEB3	1.34e-11	3.39e-13	9.08393	19.6072	1.89402
242280_x_at	CPEB4	9.71e-10	3.78e-11	-7.93011	14.9304	-2.06369
228728_at	CPED1	1.39e-11	3.55e-13	-9.07299	19.5631	-2.48717
235706_at	CPM	0.00606	0.00161	3.29243	-2.21366	1.18253
228365_at	CPNE8	3.1e-05	3.46e-06	-5.07404	3.67765	-1.7669
233208_x_at	CPSF2	5.46e-08	3.1e-09	6.8525	10.5694	2.78356
202470_s_at	CPSF6	0.00199	0.00042	3.71721	-0.949084	1.3649
227860_at	CPXM1	0.00444	0.0011	-3.41601	-1.85664	-1.30829
206244_at	CR1	0.0458	0.0196	2.39191	-4.5086	1.11649
244097_at	CR2	3.82e-09	1.7e-10	-7.56288	13.439	-1.24507
202575_at	CRABP2	1.52e-09	6.16e-11	7.811	14.4464	2.60305
227429_at	CRACR2B	1.29e-05	1.3e-06	5.33162	4.63307	1.46169
209833_at	CRADD	1.68e-08	8.6e-10	7.16716	11.8367	2.44653
225172_at	CRAMP1	4.28e-10	1.53e-11	-8.15008	15.8243	-1.42898
201990_s_at	CREBL2	2.93e-06	2.49e-07	-5.75773	6.2523	-1.41494
201989_s_at	CREBL2	0.000812	0.000146	-4.03526	0.062407	-1.01492
238476_at	CREBRF	4.54e-17	3.4e-19	-12.6331	33.3357	-2.29143
228496_s_at	CRIM1	8.18e-05	1.04e-05	-4.77803	2.6054	-1.46351
228318_s_at	CRIPAK	0.000561	9.45e-05	-4.16108	0.476348	-1.12109
207802_at	CRISP3	0.0289	0.0111	-2.6146	-3.99491	-1.94492
223475_at	CRISPLD1	0.0292	0.0112	-2.61069	-4.00422	-1.59642
202226_s_at	CRK	3.88e-05	4.47e-06	5.00615	3.42916	1.38678
241741_at	CRLS1	8.84e-17	7.21e-19	-12.4299	32.5885	-2.59342
237502_at	CRLS1	6.58e-20	2.59e-22	-14.6493	40.4593	-1.94636
238022_at	CRNDE	2.27e-05	2.45e-06	-5.16561	4.01508	-2.56683
238021_s_at	CRNDE	0.00051	8.48e-05	-4.19254	0.581023	-2.22986
216419_at	CROCC	0.00891	0.00257	3.13611	-2.6517	1.28511
204573_at	CROT	1.28e-11	3.24e-13	-9.09503	19.6519	-1.48896
221204_s_at	CRTAC1	0.0303	0.0118	2.59195	-4.04884	1.10783
1554464_a_at	CRTAP	0.00181	0.000374	-3.75271	-0.838782	-1.06004
207685_at	CRYBB3	0.00544	0.00141	3.33763	-2.08754	1.01624
207587_at	CRYGA	1.07e-06	8.21e-08	-6.03831	7.3405	-1.39343
220753_s_at	CRYL1	2.06e-06	1.68e-07	-5.85742	6.63718	-1.08667
1552347_at	CRYZL1	4.85e-07	3.42e-08	-6.25796	8.20245	-1.0125
201112_s_at	CSE1L	2.75e-07	1.83e-08	6.41384	8.81871	1.00452
210766_s_at	CSE1L	0.000758	0.000134	4.05912	0.140305	1.09028
201111_at	CSE1L	0.00248	0.000546	3.6364	-1.19758	1.1014
209716_at	CSF1	7.98e-09	3.84e-10	-7.36455	12.635	-1.86991
205159_at	CSF2RB	1.76e-06	1.42e-07	-5.89969	6.80096	-1.71538
219049_at	CSGALNACT1	9.06e-16	9.04e-18	-11.7567	30.0756	-3.42722
205958_x_at	CSHL1	0.0496	0.0218	2.35081	-4.59923	1.08554
207285_x_at	CSHL1	0.00554	0.00144	3.33067	-2.10754	1.34183
202329_at	CSK	4.92e-05	5.84e-06	4.93458	3.16884	1.43095
1562330_s_at	CSMD1	1.59e-19	6.62e-22	14.3773	39.5295	1.87744
240221_at	CSNK1A1	6.19e-09	2.9e-10	-7.43271	12.9111	-1.57923
1556007_s_at	CSNK1A1	3.93e-09	1.76e-10	-7.55523	13.4079	-1.45042
243338_at	CSNK1A1	7.58e-05	9.54e-06	-4.80211	2.69152	-1.12932
1553871_at	CSNK1G2-AS1	2.99e-07	2.01e-08	6.39062	8.7267	1.18958
212072_s_at	CSNK2A1	9.45e-06	9.1e-07	5.42441	4.98184	1.12331
1561960_at	CSPG4P5	0.048	0.0209	2.36778	-4.56197	1.00611
205344_at	CSPG5	0.00369	0.000878	3.48751	-1.64589	1.47609
220072_at	CSPP1	9.67e-15	1.23e-16	11.0757	27.4781	1.47715
242041_at	CSPP1	6.75e-10	2.53e-11	8.02761	15.3266	3.10083
225557_at	CSRNP1	7.09e-05	8.83e-06	4.82297	2.76628	1.09858
221260_s_at	CSRNP2	5.11e-07	3.62e-08	6.24348	8.14537	1.31485
225042_s_at	CSRNP2	1e-07	6.08e-09	6.68677	9.90549	1.39812
204971_at	CSTA	0.0147	0.00476	-2.92261	-3.22431	-1.4131
214418_at	CT62	2.12e-10	7.14e-12	-8.33683	16.5829	-1.41631
215733_x_at	CTAG2	0.00518	0.00132	-3.35783	-2.0294	-1.8687
232066_x_at	CTBP1-AS2	0.0427	0.018	2.42628	-4.43178	1.17602
219435_at	CTC1	0.0071	0.00194	3.22918	-2.39275	1.18431
1552368_at	CTCFL	0.000186	2.65e-05	4.52149	1.70135	2.15855
225681_at	CTHRC1	0.00108	0.000204	3.93525	-0.261211	1.91876
231794_at	CTLA4	1.66e-13	2.75e-15	-10.2839	24.3927	-1.38591
221331_x_at	CTLA4	0.00728	0.002	3.21915	-2.42092	1.08452
215883_at	CTNNA1	0.0191	0.00659	2.8066	-3.52247	1.10277
202468_s_at	CTNNAL1	0.00058	9.82e-05	-4.14994	0.439378	-1.07165
223679_at	CTNNB1	1.88e-06	1.53e-07	-5.88122	6.72936	-1.06013
202613_at	CTPS1	0.000126	1.71e-05	4.64314	2.12694	1.2068
201487_at	CTSC	0.00253	0.00056	-3.6288	-1.22077	-1.16503
214782_at	CTTN	3.04e-07	2.05e-08	-6.38552	8.70647	-1.23717
231391_at	CTXN3	1.34e-09	5.4e-11	-7.84327	14.5775	-1.52749
206775_at	CUBN	2.75e-12	6.03e-14	9.51118	21.3238	3.48287
218097_s_at	CUEDC2	3.73e-06	3.26e-07	-5.68858	5.98662	-1.2407
203532_x_at	CUL5	0.0107	0.00322	3.05903	-2.86191	1.45131
236392_at	CUL9	2.48e-07	1.63e-08	-6.4423	8.9316	-1.2291
227069_at	CUX1	1.66e-10	5.42e-12	8.4044	16.8572	2.00709
223067_at	CWC15	1e-05	9.69e-07	5.40821	4.92079	1.0266
226588_at	CWC22	2.16e-09	9.1e-11	7.71586	14.06	1.12015
1566515_at	CWF19L2	2.93e-08	1.57e-09	-7.01903	11.2392	-1.23783
220723_s_at	CWH43	0.0172	0.00578	2.85394	-3.40192	1.42876
203687_at	CX3CL1	4.47e-05	5.23e-06	4.9643	3.27676	1.3256
823_at	CX3CL1	2.77e-06	2.34e-07	5.77295	6.31092	1.68853
205898_at	CX3CR1	0.00888	0.00256	-3.13737	-2.64824	-1.26462
205242_at	CXCL13	0.0118	0.00361	3.0196	-2.96794	1.39952
226960_at	CXCL17	0.000205	2.97e-05	4.49033	1.59326	1.15541
230101_at	CXCL2	1.17e-13	1.89e-15	-10.3791	24.7672	-1.35953
206336_at	CXCL6	3.15e-08	1.7e-09	-6.99951	11.1606	-2.39988
202859_x_at	CXCL8	0.000645	0.000111	4.11331	0.318311	1.38858
207008_at	CXCR2	1.38e-06	1.09e-07	-5.96657	7.06083	-1.60226
211919_s_at	CXCR4	5.96e-06	5.46e-07	5.55648	5.48204	1.23939
209201_x_at	CXCR4	1.73e-06	1.39e-07	5.9049	6.82115	1.28088
217028_at	CXCR4	0.000334	5.19e-05	4.33255	1.05219	1.73239
220252_x_at	CXorf21	8.48e-13	1.67e-14	-9.83138	22.6016	-1.42834
219355_at	CXorf57	4.59e-13	8.53e-15	-9.99911	23.2676	-3.11434
215803_at	CXorf57	1.46e-07	9.2e-09	-6.58422	9.49607	-1.69054
222996_s_at	CXXC5	5.88e-10	2.18e-11	8.0647	15.4773	1.69637
233955_x_at	CXXC5	1.91e-10	6.32e-12	8.36679	16.7045	1.71623
224516_s_at	CXXC5	8.88e-09	4.32e-10	7.33585	12.5188	2.15335
203923_s_at	CYBB	2.34e-12	5.03e-14	-9.55603	21.5032	-2.28782
203922_s_at	CYBB	7.11e-06	6.65e-07	-5.50554	5.28859	-1.1018
233538_s_at	CYBB	0.0126	0.00393	2.99048	-3.04557	1.10157
222453_at	CYBRD1	0.000603	0.000103	-4.13615	0.393739	-1.64121
201066_at	CYC1	0.0028	0.000632	3.59104	-1.33551	1.24623
1554296_at	CYP19A1	1.14e-06	8.78e-08	-6.02136	7.27435	-1.2974
240863_at	CYP19A1	0.00055	9.24e-05	-4.16774	0.498464	-1.03255
1560295_at	CYP19A1	0.0026	0.000578	3.61877	-1.25131	1.04192
202435_s_at	CYP1B1	7.38e-22	1.8e-24	16.1383	45.3796	4.76868
207244_x_at	CYP2A6	0.00903	0.00261	-3.13053	-2.66705	-1.23569
220017_x_at	CYP2C9	0.00105	0.000197	-3.94547	-0.228373	-1.2084
214421_x_at	CYP2C9	0.0171	0.00576	2.85539	-3.39821	1.14933
217558_at	CYP2C9	1.04e-12	2.07e-14	9.77712	22.3857	1.9332
226402_at	CYP2U1	2.33e-09	9.86e-11	-7.69628	13.9804	-2.6362
220432_s_at	CYP39A1	1.89e-10	6.26e-12	-8.36922	16.7144	-2.53175
210726_at	CYP3A4	7.44e-12	1.78e-13	-9.24256	20.2459	-1.16727
205998_x_at	CYP3A4	7.1e-06	6.63e-07	5.50629	5.29145	1.41672
214235_at	CYP3A5	3.03e-07	2.04e-08	-6.38693	8.71206	-1.60636
211843_x_at	CYP3A7-CYP3A51P	7.72e-05	9.74e-06	-4.79665	2.67198	-1.36746
211231_x_at	CYP4A11	0.000209	3.04e-05	-4.4838	1.57069	-1.13662
233942_at	CYP51A1-AS1	2.51e-12	5.43e-14	-9.53704	21.4272	-1.77204
228739_at	CYS1	3.39e-08	1.84e-09	-6.98023	11.0829	-2.25086
230866_at	CYSLTR1	0.000399	6.4e-05	-4.27326	0.851603	-1.00793
1555842_at	CYTH2	4.84e-09	2.22e-10	7.49822	13.1767	2.51962
228665_at	CYYR1	0.000289	4.42e-05	4.37843	1.20846	1.51248
235044_at	CYYR1	3.81e-12	8.67e-14	9.4212	20.9633	3.20914
1559471_s_at	D21S2088E	1.97e-09	8.2e-11	7.74138	14.1636	2.23681
226666_at	DAAM1	1.05e-08	5.2e-10	-7.29006	12.3335	-1.72632
220611_at	DAB1	4.84e-05	5.73e-06	4.93968	3.18734	1.50006
228915_at	DACH1	0.0115	0.00351	3.02899	-2.9428	1.49649
205471_s_at	DACH1	0.00324	0.00075	3.53708	-1.49805	1.71401
228228_at	DACT3	2.93e-09	1.28e-10	-7.63334	13.7249	-1.41952
1562772_a_at	DAND5	0.00358	0.000845	3.49943	-1.61046	1.00197
239162_at	DAPK1-IT1	1.52e-17	1e-19	-12.9667	34.5511	-2.48568
202806_at	DBN1	2.9e-05	3.21e-06	5.09412	3.75144	1.07154
1555646_at	Dbpht2	4.16e-07	2.89e-08	6.30006	8.36853	1.65576
234295_at	DBR1	0.000228	3.34e-05	4.45681	1.47745	1.18556
238205_at	DCAF12L1	2.17e-06	1.78e-07	5.84225	6.57846	2.93269
225676_s_at	DCAF13	0.0106	0.00319	3.06221	-2.85331	1.05442
231784_s_at	DCAF13	0.00487	0.00123	3.37994	-1.9618	1.07455
243318_at	DCAF8	3.48e-11	9.6e-13	-8.82813	18.5743	-1.42679
230175_s_at	DCBLD2	0.00137	0.000269	-3.85228	-0.52586	-1.008
222925_at	DCDC2	1.04e-06	7.93e-08	6.04727	7.37554	2.5202
220373_at	DCHS2	3.04e-05	3.39e-06	5.07964	3.69823	2.39624
230962_at	DCLK1	1.04e-15	1.07e-17	-11.7133	29.9117	-2.1556
209804_at	DCLRE1A	0.00136	0.000269	3.85318	-0.523021	1.04095
242927_at	DCLRE1C	0.0235	0.00855	2.71173	-3.75922	1.21674
211896_s_at	DCN	8.3e-08	4.94e-09	-6.73756	10.1086	-3.12576
209335_at	DCN	2.39e-06	1.99e-07	-5.81489	6.47272	-1.83066
211813_x_at	DCN	0.000128	1.73e-05	-4.63989	2.1155	-1.64915
211780_x_at	DCTN1	5.47e-05	6.57e-06	-4.90266	3.05328	-1.17845
232505_at	DCTN2	0.00979	0.00288	3.09717	-2.75838	1.07282
218069_at	DCTPP1	8.31e-07	6.2e-08	6.10904	7.6172	1.04001
240781_x_at	DCUN1D1	0.000278	4.21e-05	4.39223	1.25561	1.07137
212853_at	DCUN1D4	2.69e-10	9.29e-12	-8.27258	16.3219	-1.45131
212851_at	DCUN1D4	5.86e-05	7.1e-06	-4.88189	2.97826	-1.01036
239425_at	DCUN1D5	9.58e-07	7.26e-08	-6.06928	7.46156	-1.02757
227472_at	DDA1	0.00291	0.000661	-3.57704	-1.37782	-1.19525
239299_at	DDI1	2.06e-07	1.33e-08	-6.49308	9.13327	-1.08554
209383_at	DDIT3	0.000189	2.72e-05	4.51481	1.67816	1.05958
214788_x_at	DDN	1.48e-05	1.51e-06	5.2931	4.489	2.64179
227561_at	DDR2	2.35e-17	1.64e-19	-12.831	34.0584	-2.36211
225442_at	DDR2	0.000452	7.37e-05	-4.23283	0.715708	-1.00722
213998_s_at	DDX17	4.49e-08	2.49e-09	-6.90609	10.7847	-2.17149
230180_at	DDX17	1.55e-07	9.78e-09	-6.5692	9.43621	-2.02294
208151_x_at	DDX17	2.58e-13	4.46e-15	10.1622	23.9127	2.51736
205763_s_at	DDX18	0.00215	0.000462	3.68818	-1.03875	1.24996
223331_s_at	DDX20	6.53e-16	6.33e-18	11.8507	30.4299	3.05559
224654_at	DDX21	1.38e-05	1.39e-06	5.31334	4.56463	1.91791
219945_at	DDX25	0.0153	0.00501	2.90464	-3.27109	1.24651
219328_at	DDX31	0.0137	0.00436	2.95415	-3.14165	1.22305
201584_s_at	DDX39A	0.00162	0.000329	3.7915	-0.717506	1.11401
212514_x_at	DDX3X	0.000105	1.39e-05	4.69935	2.3255	1.25586
1559954_s_at	DDX42	3.26e-09	1.43e-10	-7.6056	13.6123	-1.05412
31807_at	DDX49	1.22e-05	1.22e-06	5.34874	4.69724	1.04057
210811_s_at	DDX49	0.000294	4.5e-05	4.373	1.18991	1.0937
1568815_a_at	DDX50	6.57e-10	2.46e-11	-8.03508	15.357	-1.15952
221699_s_at	DDX50	0.00118	0.000227	-3.90334	-0.363406	-1.069
210397_at	DEFB1	0.000118	1.58e-05	4.66474	2.20312	2.29547
231155_at	DEFB119	0.000281	4.27e-05	4.38817	1.24173	1.58145
233166_at	DEFB126	0.00185	0.000386	-3.74349	-0.867473	-1.33044
233343_at	DEFB127	3.63e-13	6.52e-15	-10.0665	23.5345	-1.4905
221885_at	DENND2A	0.047	0.0203	2.37831	-4.53873	1.00381
238524_at	DENND2D	1.58e-06	1.26e-07	-5.93086	6.92197	-1.4308
1554352_s_at	DENND4A	1.24e-14	1.63e-16	-11.0035	27.1994	-1.66809
214787_at	DENND4A	6.13e-06	5.63e-07	-5.5484	5.45134	-1.03741
215058_at	DENND5B	1.05e-12	2.1e-14	-9.77321	22.37	-3.00474
228551_at	DENND5B	0.00149	0.000299	-3.82132	-0.62373	-1.37385
238982_at	DENR	2.46e-06	2.05e-07	-5.80694	6.44204	-1.56639
220295_x_at	DEPDC1	2.71e-08	1.45e-09	7.03942	11.3213	1.45231
235545_at	DEPDC1	2.56e-05	2.79e-06	5.13127	3.88826	1.51374
232278_s_at	DEPDC1	0.00021	3.05e-05	4.4824	1.56585	1.83471
222958_s_at	DEPDC1	5.25e-06	4.75e-07	5.5925	5.61924	2.00494
226980_at	DEPDC1B	5.68e-05	6.87e-06	4.8907	3.01008	1.85554
219402_s_at	DERL1	0.00199	0.000419	3.71806	-0.946445	1.05403
203695_s_at	DFNA5	5.9e-17	4.54e-19	-12.5546	33.0476	-3.25508
203669_s_at	DGAT1	3.22e-07	2.19e-08	6.36941	8.64268	1.12613
215725_at	DGCR11	0.00385	0.000924	3.47098	-1.69487	1.02816
214024_s_at	DGCR6L	4.56e-17	3.42e-19	-12.6314	33.3295	-1.38966
207518_at	DGKE	1.94e-10	6.44e-12	-8.36207	16.6853	-1.50686
227415_at	DGKH	0.000521	8.68e-05	-4.1856	0.557864	-1.18533
238194_at	DGKK	8.67e-09	4.19e-10	7.34277	12.5468	1.6157
209549_s_at	DGUOK	7.52e-07	5.53e-08	-6.1378	7.72992	-1.18691
200862_at	DHCR24	0.00129	0.000252	3.872	-0.463291	1.19095
224064_s_at	DHDDS	8.84e-06	8.46e-07	-5.44344	5.05364	-1.15467
204800_s_at	DHRS12	6.38e-13	1.22e-14	-9.90871	22.909	-1.78524
214079_at	DHRS2	0.0153	0.005	-2.90574	-3.26825	-1.51784
210788_s_at	DHRS7	0.000596	0.000102	-4.14011	0.406835	-1.22739
223952_x_at	DHRS9	1.51e-08	7.64e-10	-7.19599	11.9531	-2.02119
224009_x_at	DHRS9	1.82e-08	9.41e-10	7.14524	11.7482	2.78444
227094_at	DHTKD1	5.43e-05	6.52e-06	4.9048	3.06103	1.02399
209916_at	DHTKD1	4.48e-07	3.13e-08	6.28024	8.29031	1.04519
217245_at	DIAPH2-AS1	3.88e-05	4.46e-06	5.00673	3.4313	2.09507
210802_s_at	DIMT1	1.67e-10	5.45e-12	-8.4029	16.8511	-2.33767
242970_at	DIP2B	1.87e-08	9.68e-10	7.13832	11.7202	1.37947
219619_at	DIRAS2	6.23e-06	5.74e-07	5.54368	5.43337	2.28791
215506_s_at	DIRAS3	5.47e-21	1.66e-23	-15.462	43.1802	-4.08926
242539_at	DIS3L2	0.000287	4.37e-05	-4.38126	1.21813	-1.00627
244304_at	DIS3L2	1.15e-06	8.92e-08	6.01746	7.25914	2.39338
1563744_a_at	DISC1	0.000788	0.00014	4.04601	0.097482	1.08369
228184_at	DISP1	1.57e-11	4.05e-13	-9.04051	19.4321	-1.93044
230861_at	DKFZP434L187	0.000198	2.85e-05	-4.5009	1.62988	-1.21597
1563511_at	DKFZp451B082	8.58e-11	2.61e-12	8.58347	17.5836	2.59284
216028_at	DKFZP564C152	4.1e-06	3.61e-07	5.66252	5.88676	1.25409
204602_at	DKK1	1.5e-07	9.45e-09	6.57751	9.46932	2.41599
221127_s_at	DKK3	0.0134	0.00426	-2.96218	-3.12048	-1.06939
1556821_x_at	DLEU2	1.43e-10	4.61e-12	-8.44376	17.0169	-1.55277
1556820_a_at	DLEU2	1.4e-08	7.09e-10	-7.21431	12.0272	-1.45341
228973_at	DLG2	0.000294	4.5e-05	-4.3731	1.19023	-1.05326
210469_at	DLG5	4.4e-14	6.57e-16	-10.6471	25.8161	-1.27416
239565_at	DLG5-AS1	0.00143	0.000284	3.83645	-0.575967	1.04701
1568736_s_at	DLGAP1	1.89e-05	1.99e-06	-5.21956	4.21506	-1.25157
216916_s_at	DLGAP2	3.24e-12	7.23e-14	-9.46604	21.143	-2.50963
210227_at	DLGAP2	0.000218	3.19e-05	-4.46963	1.52171	-1.03937
202571_s_at	DLGAP4	0.00737	0.00203	3.21451	-2.43392	1.00228
203764_at	DLGAP5	1.39e-11	3.55e-13	9.07308	19.5635	3.00773
230882_at	DLX6-AS1	1.22e-13	1.99e-15	10.3655	24.7135	4.24342
203881_s_at	DMD	1.77e-05	1.85e-06	-5.23917	4.28793	-2.05947
231790_at	DMGDH	0.000183	2.6e-05	-4.52652	1.71882	-1.62493
1554429_a_at	DMWD	0.00433	0.00106	3.42599	-1.8274	1.04838
241472_at	DMXL1	4.27e-08	2.36e-09	-6.91952	10.8387	-1.26812
213647_at	DNA2	1.36e-10	4.35e-12	8.45775	17.0737	1.82739
242283_at	DNAH14	8.74e-07	6.56e-08	6.09494	7.56197	1.2776
214229_at	DNAH17	0.000316	4.88e-05	4.35034	1.11267	1.08749
1560803_at	DNAH3	2.2e-09	9.27e-11	7.71135	14.0417	1.14626
215266_at	DNAH3	0.0163	0.00542	2.87692	-3.34284	1.18695
215341_at	DNAH6	3.35e-05	3.78e-06	5.05034	3.59075	1.26663
210345_s_at	DNAH9	1.57e-06	1.25e-07	5.93175	6.92541	1.94251
1554078_s_at	DNAJA3	4.39e-08	2.43e-09	6.91196	10.8083	1.5151
223054_at	DNAJB11	6.25e-05	7.66e-06	4.86166	2.90534	1.0368
230936_at	DNAJB13	0.0013	0.000253	3.87083	-0.467005	1.17473
222850_s_at	DNAJB14	1.35e-06	1.06e-07	-5.97332	7.08709	-1.42271
209015_s_at	DNAJB6	0.00305	0.000697	3.56009	-1.42892	1.06752
202843_at	DNAJB9	0.00055	9.24e-05	-4.16775	0.498499	-1.05357
239065_at	DNAJC22	0.00577	0.00151	-3.31179	-2.15834	-1.55572
220441_at	DNAJC22	6.04e-06	5.54e-07	5.5526	5.4673	1.46102
223504_at	DNAJC27	1.68e-08	8.59e-10	-7.16738	11.8376	-1.01765
239119_at	DNAJC3-AS1	0.0318	0.0125	2.56891	-4.10334	1.02693
232798_at	DNAJC5B	4.94e-05	5.87e-06	4.93321	3.16389	1.33028
1556053_at	DNAJC7	1.5e-14	2.02e-16	-10.9484	26.9865	-1.44953
215252_at	DNAJC7	0.000152	2.11e-05	-4.58436	1.92057	-1.19699
202416_at	DNAJC7	0.00029	4.43e-05	-4.37749	1.20525	-1.00354
204008_at	DNAL4	0.000121	1.62e-05	4.65717	2.17638	1.29498
205186_at	DNALI1	0.00627	0.00168	-3.27842	-2.25352	-1.21812
240144_at	DNASE1	5.03e-10	1.83e-11	-8.10747	15.6511	-1.25597
228929_at	DNASE1	7.88e-12	1.9e-13	-9.22696	20.1832	-1.15323
226281_at	DNER	0.000616	0.000106	-4.12903	0.370185	-1.67459
229631_at	DNHD1	1.68e-08	8.63e-10	-7.1663	11.8332	-1.44317
215116_s_at	DNM1	1.12e-07	6.85e-09	-6.65715	9.78711	-1.55689
203105_s_at	DNM1L	0.000427	6.91e-05	4.2513	0.777703	1.04206
38703_at	DNPEP	8.18e-05	1.04e-05	4.77802	2.60539	1.08289
202776_at	DNTTIP2	1.31e-11	3.33e-13	9.08832	19.6249	1.97618
232973_at	DOCK1	0.00209	0.000447	3.69853	-1.00684	1.0112
203187_at	DOCK1	0.000908	0.000166	3.99602	-0.065163	1.08861
226875_at	DOCK11	6.73e-11	1.99e-12	-8.64888	17.8487	-2.76177
238356_at	DOCK11	4.05e-09	1.82e-10	-7.54683	13.3739	-1.78269
205003_at	DOCK4	0.000158	2.21e-05	-4.57193	1.87712	-1.24404
244840_x_at	DOCK4	5.01e-06	4.51e-07	-5.60582	5.67002	-1.01914
230206_at	DOCK5	4.01e-16	3.75e-18	-11.9897	30.9518	-3.11036
230263_s_at	DOCK5	4.42e-09	2e-10	-7.52426	13.2823	-2.65559
230207_s_at	DOCK5	6.08e-19	2.98e-21	-13.9467	38.0373	-2.17231
1570078_a_at	DOCK5	9.48e-09	4.63e-10	-7.31868	12.4493	-1.07972
219921_s_at	DOCK5	0.017	0.00572	2.85795	-3.39164	1.12227
237470_at	DOCK7	9.46e-06	9.11e-07	5.42423	4.98116	1.08139
239027_at	DOCK8	0.0336	0.0134	2.54282	-4.16458	1.11761
207747_s_at	DOK4	5.67e-05	6.86e-06	4.89122	3.01194	1.54838
213267_at	DOPEY1	2.92e-08	1.57e-09	-7.01928	11.2402	-1.0128
220179_at	DPEP3	0.00366	0.000869	3.49082	-1.63605	1.44901
219746_at	DPF3	0.00414	0.00101	3.44301	-1.7774	1.11316
235357_at	DPF3	0.0376	0.0154	2.48728	-4.29322	1.24002
225195_at	DPH3	0.00252	0.000556	3.63091	-1.21432	1.06682
219590_x_at	DPH5	8.61e-18	5.43e-20	13.1344	35.1567	2.61976
224196_x_at	DPH5	3.47e-17	2.53e-19	12.7134	33.6295	2.63564
238662_at	DPH6	8.45e-08	5.04e-09	-6.73296	10.0903	-1.2683
238744_at	DPH6	2.56e-06	2.14e-07	-5.79608	6.40009	-1.0286
228598_at	DPP10	1.38e-10	4.41e-12	-8.45481	17.0618	-4.50258
236351_at	DPP10-AS1	5.94e-13	1.13e-14	-9.92829	22.9867	-2.28793
232510_s_at	DPP3	3.09e-05	3.45e-06	5.07517	3.68183	1.04057
218567_x_at	DPP3	8.46e-07	6.33e-08	6.10393	7.59716	1.14873
203717_at	DPP4	7.8e-05	9.85e-06	-4.79342	2.66043	-2.375
211478_s_at	DPP4	1.05e-05	1.02e-06	-5.39401	4.86731	-1.89688
228546_at	DPP6	4.6e-06	4.1e-07	-5.62978	5.76154	-2.19947
238012_at	DPP7	5.11e-05	6.09e-06	4.92321	3.12765	1.12555
241973_x_at	DPP7	3.2e-05	3.59e-06	5.06411	3.64124	1.23317
213068_at	DPT	5.39e-10	1.97e-11	-8.08864	15.5746	-2.29587
1560916_a_at	DPY19L1	0.0376	0.0154	2.48728	-4.29321	1.23411
230158_at	DPY19L2	1.08e-05	1.06e-06	-5.38448	4.83147	-1.68438
215143_at	DPY19L2P2	0.000109	1.45e-05	-4.68803	2.28543	-1.60086
204646_at	DPYD	2.02e-08	1.05e-09	-7.11787	11.6377	-3.21448
200762_at	DPYSL2	0.00576	0.00151	-3.31296	-2.15499	-1.2567
208486_at	DRD5	0.00305	0.000699	3.5594	-1.431	1.48793
1569881_at	DRP2	1.88e-11	4.94e-13	-8.99129	19.2335	-2.10767
244107_at	DSC3	2.5e-16	2.24e-18	-12.1267	31.4635	-3.01718
206032_at	DSC3	9.93e-15	1.28e-16	-11.0673	27.4455	-2.99231
206033_s_at	DSC3	1e-07	6.07e-09	-6.68699	9.90637	-1.32411
232059_at	DSCAML1	2.03e-16	1.78e-18	-12.1876	31.6907	-2.89503
219000_s_at	DSCC1	2.16e-09	9.08e-11	7.71639	14.0621	1.25434
218854_at	DSE	4.7e-09	2.14e-10	-7.50685	13.2117	-2.27041
232235_at	DSEL	0.00156	0.000316	-3.80423	-0.677508	-1.6979
1561330_at	DSG4	2.68e-15	2.96e-17	-11.4457	28.8961	-2.34318
215810_x_at	DST	2.21e-15	2.41e-17	-11.4996	29.1014	-2.4934
232098_at	DST	4.41e-11	1.25e-12	-8.7633	18.312	-2.35533
212254_s_at	DST	0.000143	1.97e-05	-4.60384	1.98882	-1.59362
215016_x_at	DST	0.000246	3.65e-05	-4.432	1.39204	-1.24611
222680_s_at	DTL	1.3e-05	1.31e-06	5.32968	4.62583	1.29073
218585_s_at	DTL	2.61e-10	8.97e-12	8.28125	16.3571	2.47193
227084_at	DTNA	2.32e-10	7.92e-12	-8.31165	16.4806	-2.03529
236649_at	DTWD1	9.7e-15	1.24e-16	-11.0744	27.4729	-2.06614
222022_at	DTX3	3.55e-08	1.94e-09	6.96802	11.0338	1.56225
212611_at	DTX4	7.38e-06	6.93e-07	-5.4951	5.24901	-1.68514
219597_s_at	DUOX1	2.04e-05	2.17e-06	5.19719	4.13201	1.52414
1555404_a_at	DUOXA1	1.12e-07	6.86e-09	6.65669	9.78525	1.59325
205762_s_at	DUS4L	2.08e-05	2.21e-06	-5.19211	4.11319	-1.00706
221563_at	DUSP10	6.31e-05	7.74e-06	4.85876	2.89492	1.28582
234829_at	DUSP15	0.00105	0.000197	3.94576	-0.227417	1.17702
227098_at	DUSP18	0.0206	0.00724	2.7726	-3.60806	1.01534
1553701_a_at	DUSP18	1.69e-09	6.98e-11	7.7805	14.3225	1.17243
223402_at	DUSP23	4.42e-10	1.59e-11	8.14115	15.788	1.90737
226034_at	DUSP4	0.00215	0.00046	3.68921	-1.03557	1.11779
239010_at	DUXAP10	0.000111	1.47e-05	4.68365	2.26993	2.07738
242881_x_at	DUXAP10	3.95e-06	3.48e-07	5.67223	5.92394	2.57537
220774_at	DYM	8.57e-10	3.29e-11	-7.964	15.0681	-1.10016
236183_at	DYNC1H1	0.00982	0.00289	3.09571	-2.76236	1.25366
219469_at	DYNC2H1	0.0009	0.000164	-3.99954	-0.053752	-1.20902
1565149_at	DYNC2H1	1.13e-05	1.11e-06	-5.37295	4.78813	-1.039
241757_x_at	DYNC2LI1	0.000877	0.00016	-4.00824	-0.025518	-1.22436
239308_at	DYRK1A	0.0132	0.00416	2.97037	-3.09887	1.20151
202968_s_at	DYRK2	1.09e-05	1.07e-06	5.38353	4.82791	1.14383
204557_s_at	DZIP1	0.00376	0.000896	-3.48088	-1.66557	-1.52357
207231_at	DZIP3	5.96e-07	4.28e-08	-6.20214	7.98264	-1.09024
2028_s_at	E2F1	0.00179	0.000371	3.75505	-0.831487	1.04332
204947_at	E2F1	2.63e-13	4.55e-15	10.1567	23.8912	2.06815
203692_s_at	E2F3	1e-05	9.73e-07	5.40704	4.91637	1.38456
38707_r_at	E2F4	9.37e-05	1.22e-05	4.73577	2.45478	1.31983
228033_at	E2F7	2.8e-06	2.37e-07	5.77003	6.29969	1.95109
219990_at	E2F8	2e-09	8.38e-11	7.73604	14.1419	2.21078
1563796_s_at	EARS2	0.000603	0.000103	4.13593	0.393006	1.08139
227646_at	EBF1	0.00732	0.00202	3.21664	-2.42796	1.10804
229487_at	EBF1	0.000816	0.000146	4.03354	0.056787	1.57842
201749_at	ECE1	5.95e-09	2.78e-10	7.44324	12.9538	1.27987
227103_s_at	ECE2	4.64e-08	2.59e-09	6.89675	10.7472	1.52437
235305_s_at	ECHDC2	4.39e-08	2.43e-09	-6.91205	10.8087	-1.00849
219298_at	ECHDC3	0.000148	2.05e-05	-4.59347	1.95247	-1.52956
206101_at	ECM2	1.07e-08	5.27e-10	-7.2871	12.3215	-2.79433
227780_s_at	ECSCR	3.98e-06	3.5e-07	5.67042	5.91699	1.68804
219787_s_at	ECT2	1.6e-08	8.15e-10	7.18041	11.8902	2.28607
219207_at	EDC3	0.000712	0.000125	4.07994	0.208531	1.13208
208142_at	EDDM3A	5.36e-11	1.55e-12	-8.71107	18.1006	-1.7543
207379_at	EDIL3	0.000104	1.38e-05	4.7025	2.33665	1.00382
204464_s_at	EDNRA	0.00205	0.000436	-3.70597	-0.983843	-1.06295
204273_at	EDNRB	0.00466	0.00116	-3.39696	-1.91226	-1.65048
206701_x_at	EDNRB	4.42e-05	5.16e-06	-4.96761	3.28878	-1.21099
208115_x_at	EDRF1	5.98e-05	7.27e-06	-4.87544	2.95499	-1.15187
220156_at	EFCAB1	4.24e-09	1.91e-10	7.53535	13.3273	2.21094
1559022_at	EFCAB14	6.9e-29	2.9e-32	-22.321	62.9975	-3.22419
1562815_at	EFCAB6	3.52e-07	2.41e-08	-6.34533	8.54742	-1.06834
201843_s_at	EFEMP1	3.14e-10	1.1e-11	-8.23059	16.1514	-4.42294
201842_s_at	EFEMP1	6.58e-09	3.11e-10	-7.41618	12.8442	-3.86395
220523_at	EFHC2	0.00584	0.00154	3.30702	-2.17199	1.14812
214036_at	EFNA5	8.68e-17	7.07e-19	-12.4353	32.6085	-2.47945
233814_at	EFNA5	4.44e-08	2.46e-09	-6.90903	10.7965	-1.94309
227955_s_at	EFNA5	0.000794	0.000142	-4.04345	0.089116	-1.34318
227283_at	EFR3B	0.0125	0.00389	2.99366	-3.03713	1.06844
215328_at	EFR3B	0.000731	0.000129	4.07121	0.179916	1.36147
1556740_at	EGFLAM-AS2	1.09e-08	5.37e-10	-7.28219	12.3017	-1.26661
210984_x_at	EGFR	0.000767	0.000136	4.05528	0.127755	1.02321
211551_at	EGFR	0.00698	0.00191	3.23543	-2.37515	1.04799
1565483_at	EGFR	0.000278	4.21e-05	4.39225	1.25569	1.42344
1565484_x_at	EGFR	0.000353	5.55e-05	4.31398	0.98919	1.42865
222847_s_at	EGLN3	0.0026	0.000577	3.61957	-1.2489	1.26279
222221_x_at	EHD1	3.35e-11	9.23e-13	-8.83792	18.6139	-2.0972
208112_x_at	EHD1	0.00341	0.000799	3.51732	-1.55716	1.19628
205341_at	EHD2	0.000219	3.2e-05	4.46893	1.51929	1.66325
232361_s_at	EHF	7.55e-06	7.12e-07	5.48806	5.22238	1.00571
232360_at	EHF	0.000486	8.02e-05	4.20839	0.6339	1.28306
219850_s_at	EHF	1.95e-08	1.01e-09	7.12735	11.6759	1.86289
225645_at	EHF	1.67e-11	4.34e-13	9.02319	19.3623	3.30018
205222_at	EHHADH	0.000723	0.000127	4.07475	0.191509	1.14355
229079_at	EHMT2	0.00193	0.000404	3.72899	-0.912557	1.7472
231292_at	EID3	0.00158	0.00032	-3.80079	-0.688316	-1.03914
217672_x_at	EIF1	1.47e-16	1.26e-18	-12.2804	32.0355	-3.02812
1557212_at	EIF1B-AS1	6.15e-05	7.5e-06	4.86707	2.92484	2.20273
1558050_at	EIF2B5	0.00207	0.000439	-3.70367	-0.990945	-1.07506
230479_at	EIF3F	0.000122	1.64e-05	-4.65404	2.16534	-1.20173
236605_at	EIF3K	3.04e-12	6.73e-14	-9.48389	21.2145	-1.43311
240513_at	EIF3M	1.66e-06	1.32e-07	-5.91774	6.87101	-1.10962
211938_at	EIF4B	0.00571	0.00149	-3.31618	-2.14577	-1.03004
208625_s_at	EIF4G1	9.37e-10	3.63e-11	7.93982	14.9698	2.29986
217607_x_at	EIF4G2	0.00689	0.00188	-3.24045	-2.36101	-1.11121
235289_at	EIF5A2	1.05e-09	4.12e-11	-7.90903	14.8447	-2.07642
214314_s_at	EIF5B	0.000201	2.9e-05	4.49611	1.61329	1.05151
210213_s_at	EIF6	0.0067	0.00182	3.25179	-2.32901	1.03915
208427_s_at	ELAVL2	8.68e-05	1.12e-05	-4.75935	2.53875	-1.68659
210361_s_at	ELF2	4.05e-07	2.81e-08	-6.30713	8.39646	-1.31782
201510_at	ELF3	5.76e-11	1.68e-12	8.69145	18.0212	2.30264
210827_s_at	ELF3	1.2e-14	1.57e-16	11.014	27.24	2.71662
229842_at	ELF3	7.02e-14	1.09e-15	10.519	25.3156	2.82238
1559072_a_at	ELFN2	5.34e-15	6.37e-17	11.2469	28.1361	1.32334
204095_s_at	ELL	4.55e-10	1.64e-11	8.13367	15.7576	2.22751
226982_at	ELL2	5.46e-07	3.89e-08	-6.22575	8.07557	-1.71035
214446_at	ELL2	2e-08	1.04e-09	7.11968	11.645	2.62976
219517_at	ELL3	3.6e-30	1.34e-33	23.5323	65.9863	4.32637
225980_at	ELMSAN1	2.5e-16	2.23e-18	-12.127	31.465	-1.85729
237365_at	ELOVL2-AS1	1.18e-05	1.17e-06	5.35995	4.73932	1.15399
219532_at	ELOVL4	3.25e-07	2.21e-08	-6.36647	8.63106	-1.5191
214153_at	ELOVL5	3.13e-07	2.12e-08	-6.37736	8.67417	-1.29377
204256_at	ELOVL6	0.000682	0.000119	4.09425	0.255542	1.32658
230178_s_at	ELP2	6.39e-09	3.01e-10	-7.4236	12.8742	-1.79852
229864_at	ELP6	0.00308	0.000707	3.55575	-1.44198	1.07599
1556186_s_at	EMC1	5.15e-17	3.9e-19	-12.5958	33.1991	-2.45572
222345_at	EMC10	9.84e-13	1.96e-14	-9.79126	22.442	-1.10166
221255_s_at	EMC6	0.0156	0.00514	2.89605	-3.29339	1.03028
227874_at	EMCN	1.47e-08	7.45e-10	-7.2022	11.9782	-1.45494
234464_s_at	EME1	0.000106	1.4e-05	4.69719	2.31787	1.12192
224374_s_at	EMILIN2	7.7e-08	4.55e-09	-6.75802	10.1906	-1.64746
204796_at	EML1	0.00678	0.00184	-3.2473	-2.3417	-1.13679
232587_at	EML4	4.34e-09	1.96e-10	7.52888	13.301	2.21075
203729_at	EMP3	6.34e-10	2.37e-11	-8.04451	15.3953	-2.3973
201340_s_at	ENC1	0.0129	0.00405	2.98004	-3.07328	1.26408
228403_at	ENHO	2.63e-08	1.4e-09	-7.04759	11.3543	-1.52538
216554_s_at	ENO1	0.00132	0.000258	-3.86478	-0.486227	-1.05244
219501_at	ENOX1	4.76e-09	2.18e-10	-7.50301	13.1961	-1.23833
205065_at	ENPP1	1.59e-12	3.3e-14	-9.66088	21.9222	-1.68706
222938_x_at	ENPP3	0.00108	0.000203	3.93698	-0.255652	1.03111
209473_at	ENTPD1	6.18e-09	2.9e-10	7.43326	12.9134	1.87315
219731_at	ENTPD1-AS1	0.00144	0.000287	3.83328	-0.585961	1.02316
1555118_at	ENTPD3	3.12e-11	8.5e-13	-8.85824	18.6961	-2.97454
206191_at	ENTPD3	0.000398	6.36e-05	4.27492	0.857185	1.13938
231676_s_at	ENTPD5	2.12e-09	8.89e-11	-7.72157	14.0831	-1.44904
201704_at	ENTPD6	1.35e-06	1.06e-07	5.97398	7.08965	1.34597
235204_at	ENTPD7	8.84e-12	2.16e-13	-9.19491	20.0542	-1.80901
221935_s_at	EOGT	1.01e-16	8.35e-19	-12.3904	32.4424	-3.10973
1562921_at	EP300-AS1	0.000166	2.33e-05	4.5572	1.82569	1.00375
230289_at	EPB41L1	7.64e-15	9.48e-17	-11.1439	27.7404	-1.62426
222066_at	EPB41L1	0.00365	0.000864	3.49232	-1.6316	1.16949
212681_at	EPB41L3	4.64e-07	3.25e-08	-6.27073	8.25278	-1.70183
206710_s_at	EPB41L3	0.00511	0.0013	-3.36083	-2.0172	-1.22829
228259_s_at	EPB41L4A-AS1	2.53e-07	1.67e-08	-6.43671	8.9094	-1.72561
225698_at	EPB41L4A-AS1	0.0112	0.00341	-3.03911	-2.91561	-1.01765
220364_at	EPB41L4A-AS2	1.75e-09	7.24e-11	-7.7717	14.2868	-1.62681
220161_s_at	EPB41L4B	7.81e-07	5.76e-08	6.1274	7.68913	1.61515
229292_at	EPB41L5	6.55e-08	3.78e-09	6.8037	10.3737	2.12355
210746_s_at	EPB42	1.41e-19	5.8e-22	-14.4155	39.6605	-1.79003
225417_at	EPC1	2.29e-13	3.93e-15	-10.1941	24.0389	-1.23783
201839_s_at	EPCAM	5.31e-10	1.94e-11	8.09256	15.5905	2.60766
241482_at	EPHA1	2.53e-10	8.67e-12	8.2896	16.3911	1.14574
238263_at	EPHA1-AS1	2.64e-09	1.13e-10	-7.66245	13.8431	-1.42199
211164_at	EPHA3	0.000168	2.37e-05	-4.55811	1.81441	-1.06692
238533_at	EPHA7	0.000484	7.99e-05	-4.20975	0.638455	-1.05706
1554629_at	EPHA7	1.25e-07	7.75e-09	6.62672	9.6656	1.26996
206852_at	EPHA7	4.88e-10	1.77e-11	8.11513	15.6822	1.42761
239579_at	EPHX4	9.65e-10	3.75e-11	7.93204	14.9382	2.98281
396_f_at	EPOR	0.000794	0.000142	4.04308	0.087887	1.07103
221056_x_at	EPS15L1	1.64e-08	8.37e-10	-7.17385	11.8637	-1.68342
202609_at	EPS8	0.000311	4.79e-05	-4.35528	1.12948	-1.28895
1555274_a_at	EPT1	1.13e-07	6.94e-09	6.65402	9.7746	1.90663
206439_at	EPYC	0.000592	0.000101	4.14243	0.414524	1.57694
212087_s_at	ERAL1	0.00726	0.002	3.22016	-2.41809	1.25359
214012_at	ERAP1	0.00297	0.000675	-3.5705	-1.39757	-1.30121
216836_s_at	ERBB2	8.97e-10	3.46e-11	7.9515	15.0173	1.55903
1552663_a_at	ERC1	0.00088	0.00016	4.00722	-0.028834	1.12719
213938_at	ERC2	7.44e-05	9.34e-06	-4.80799	2.71258	-1.22441
219650_at	ERCC6L	0.0233	0.00844	2.71653	-3.74741	1.06574
205767_at	EREG	0.00313	0.00072	-3.54991	-1.45954	-1.47059
211626_x_at	ERG	0.00172	0.000353	-3.77076	-0.782423	-1.32763
231852_at	ERI1	0.000392	6.27e-05	-4.27904	0.871083	-1.41881
213365_at	ERI2	0.000812	0.000146	4.03513	0.061967	1.05653
1563315_s_at	ERICH1	1.35e-07	8.41e-09	-6.60638	9.58444	-1.46031
1556356_at	ERICH1	0.0202	0.00706	2.78153	-3.58566	1.32115
1557679_at	ERICH1-AS1	0.0388	0.016	2.47229	-4.32752	1.0495
229973_at	ERICH3	0.00363	0.000861	-3.4937	-1.62751	-1.44481
243753_at	ERICH3	3.47e-19	1.62e-21	14.1208	38.6436	2.28389
224630_at	ERLEC1	0.00198	0.000417	3.71963	-0.941588	1.29026
238615_at	ERLIN2	0.0187	0.00643	-2.81559	-3.4997	-1.01395
218342_s_at	ERMP1	3.22e-06	2.76e-07	-5.73091	6.14915	-1.01126
227755_at	ERN1	8.78e-09	4.26e-10	-7.33906	12.5318	-2.07255
214372_x_at	ERN2	7.41e-07	5.44e-08	-6.14188	7.74593	-1.29904
222646_s_at	ERO1A	0.00121	0.000234	3.89486	-0.390475	1.08769
220012_at	ERO1B	0.00469	0.00117	3.39482	-1.91852	1.89005
222139_at	ERV3-2	4.4e-06	3.9e-07	5.64284	5.81144	1.60018
1557914_s_at	ERVFH21-1	0.00597	0.00158	3.29841	-2.19658	1.41559
1570266_x_at	ERVH-1	1.98e-05	2.1e-06	5.20557	4.16313	1.34443
208360_s_at	ERVH-4	0.00334	0.00078	3.52498	-1.53426	1.25088
1563629_a_at	ERVK13-1	8.61e-10	3.31e-11	-7.96271	15.0629	-1.31319
225369_at	ESAM	0.0468	0.0202	2.38023	-4.53449	1.02333
235588_at	ESCO2	1.6e-06	1.28e-07	5.92701	6.90702	2.1144
235178_x_at	ESCO2	2e-08	1.05e-09	7.11942	11.644	2.61339
215095_at	ESD	1.6e-08	8.16e-10	-7.18008	11.8889	-1.82953
228162_at	ESD	5.63e-08	3.21e-09	-6.84426	10.5364	-1.70083
208394_x_at	ESM1	4.87e-13	9.1e-15	9.9829	23.2033	3.87891
204817_at	ESPL1	0.000171	2.42e-05	4.54715	1.79062	1.00568
38158_at	ESPL1	1.5e-09	6.08e-11	7.81428	14.4597	1.10776
223549_s_at	ESPN	1.08e-11	2.7e-13	9.14017	19.8338	1.42989
219121_s_at	ESRP1	2.13e-10	7.19e-12	8.33535	16.5769	1.79828
225846_at	ESRP1	3.73e-09	1.66e-10	7.5689	13.4634	2.44551
1487_at	ESRRA	1.38e-06	1.09e-07	5.96793	7.06611	1.14756
224699_s_at	ESYT2	0.00239	0.000524	3.64939	-1.15787	1.14389
1558511_s_at	ESYT2	0.00173	0.000356	3.76823	-0.790354	1.18639
1563475_s_at	ETFBKMT	4.15e-10	1.49e-11	-8.1579	15.8561	-1.24038
1554583_a_at	ETFBKMT	0.0316	0.0124	2.57245	-4.095	1.1366
224454_at	ETNK1	0.000807	0.000144	4.03756	0.069888	1.2609
221008_s_at	ETNPPL	2.05e-09	8.59e-11	-7.7298	14.1166	-1.70108
201328_at	ETS2	1.51e-05	1.55e-06	-5.28521	4.45954	-1.1474
221911_at	ETV1	0.0037	0.000882	-3.48597	-1.65046	-1.35164
217061_s_at	ETV1	0.0384	0.0159	2.4766	-4.31767	1.21313
206501_x_at	ETV1	0.0215	0.00763	2.7536	-3.65553	1.24963
217053_x_at	ETV1	0.000404	6.49e-05	4.26926	0.838106	1.7217
211603_s_at	ETV4	0.00137	0.00027	3.85194	-0.526957	1.1196
235056_at	ETV6	0.000143	1.97e-05	4.60446	1.99098	1.03546
225764_at	ETV6	5.24e-10	1.91e-11	8.09636	15.606	1.31105
227828_s_at	EVA1A	0.00109	0.000207	3.93156	-0.27304	1.08541
229998_x_at	EVA1B	0.00137	0.000271	3.85086	-0.530375	1.01787
1555256_at	EVC2	2.27e-18	1.27e-20	-13.5385	36.6004	-1.36169
204774_at	EVI2A	0.00968	0.00284	-3.10164	-2.74619	-1.06739
226411_at	EVI5L	2.35e-06	1.95e-07	-5.81967	6.4912	-1.01188
236933_at	EVPLL	5.55e-05	6.69e-06	4.89794	3.03624	1.17077
229966_at	EWSR1	4.77e-07	3.36e-08	-6.2627	8.22114	-1.28315
224926_at	EXOC4	0.000114	1.52e-05	-4.67598	2.24281	-1.12351
1559044_at	EXOSC1	6.09e-08	3.5e-09	-6.82298	10.451	-1.25482
227912_s_at	EXOSC3	0.00316	0.00073	3.54585	-1.47172	1.23186
218695_at	EXOSC4	0.000288	4.4e-05	4.37972	1.21285	1.06423
213929_at	EXPH5	1.16e-05	1.15e-06	5.36305	4.75096	1.08947
209692_at	EYA2	9.74e-09	4.77e-10	7.31112	12.4187	3.16347
238877_at	EYA4	0.00371	0.000884	3.48511	-1.65301	1.4341
239197_s_at	EZH1	0.0309	0.012	2.58393	-4.06785	1.28614
203358_s_at	EZH2	5.98e-10	2.22e-11	8.06019	15.459	1.69677
217234_s_at	EZR	1.74e-11	4.54e-13	-9.01205	19.3173	-2.58383
208621_s_at	EZR	8.63e-11	2.62e-12	-8.58191	17.5773	-1.90278
208623_s_at	EZR	3.94e-05	4.54e-06	-5.00189	3.41365	-1.42347
217230_at	EZR	0.0128	0.00401	2.98278	-3.06602	1.28062
205774_at	F12	0.00213	0.000456	3.69193	-1.0272	1.14799
203305_at	F13A1	0.00123	0.000239	-3.88856	-0.410571	-1.07857
206795_at	F2RL2	1.02e-05	9.96e-07	-5.40111	4.89403	-1.37078
230792_at	FAAH2	0.000106	1.41e-05	4.69655	2.31557	1.13476
203980_at	FABP4	3.93e-09	1.76e-10	-7.55523	13.4079	-2.73499
235978_at	FABP4	3.65e-06	3.18e-07	-5.69509	6.01158	-1.07702
210445_at	FABP6	0.0112	0.00339	3.04151	-2.90914	1.62321
218080_x_at	FAF1	2.59e-07	1.71e-08	6.43052	8.88485	1.02553
212106_at	FAF2	2.27e-07	1.48e-08	6.46646	9.0275	1.52721
226905_at	FAM101B	0.0078	0.00218	-3.19087	-2.50002	-1.18538
220575_at	FAM106A	1.14e-13	1.84e-15	-10.3852	24.7908	-1.61316
209074_s_at	FAM107A	8.59e-05	1.1e-05	4.76267	2.55061	2.35051
226504_at	FAM109B	2.23e-06	1.84e-07	5.83493	6.55014	2.01684
1557129_a_at	FAM111B	3.43e-05	3.89e-06	5.04317	3.56451	1.0991
222682_s_at	FAM114A2	1.95e-10	6.48e-12	-8.36045	16.6788	-1.88061
1553220_at	FAM117B	4.71e-08	2.64e-09	6.89218	10.7288	1.18514
226431_at	FAM117B	0.000127	1.72e-05	4.64125	2.12028	1.24613
200767_s_at	FAM120A	1.66e-07	1.06e-08	-6.54983	9.35908	-1.08623
1555944_at	FAM120A	0.00917	0.00266	3.12429	-2.68419	1.2119
241013_at	FAM124A	0.0125	0.00387	2.99539	-3.03252	1.09735
201828_x_at	FAM127A	3.15e-05	3.54e-06	-5.06804	3.65566	-1.02086
232806_s_at	FAM131A	2.88e-13	5.04e-15	-10.1312	23.7903	-1.25991
218532_s_at	FAM134B	8.28e-09	3.99e-10	-7.35475	12.5953	-2.31812
224001_at	FAM135B	0.00938	0.00273	3.11465	-2.7106	1.47275
202973_x_at	FAM13A	0.00123	0.000237	-3.89063	-0.403976	-1.10253
217047_s_at	FAM13A	0.000787	0.00014	-4.04637	0.09863	-1.04305
218518_at	FAM13B	0.00105	0.000198	-3.9448	-0.230509	-1.19116
1554547_at	FAM13C	4.68e-08	2.62e-09	-6.89385	10.7355	-2.27777
238018_at	FAM150B	0.000252	3.75e-05	-4.42419	1.36518	-2.73942
230869_at	FAM155A	2.21e-07	1.44e-08	-6.47337	9.05496	-2.74083
214825_at	FAM155A	6e-07	4.31e-08	-6.20018	7.97494	-1.84695
206299_at	FAM155B	0.000145	1.99e-05	4.60057	1.97735	1.05023
231267_at	FAM163A	2.04e-09	8.54e-11	7.73125	14.1225	2.52878
235048_at	FAM169A	0.00536	0.00138	3.34145	-2.07313	1.02902
212771_at	FAM171A1	5.64e-06	5.14e-07	5.57213	5.54162	1.62602
227370_at	FAM171B	0.0048	0.00121	-3.38535	-1.94608	-1.35712
221880_s_at	FAM174B	1.06e-05	1.04e-06	5.38964	4.85089	1.14678
226521_s_at	FAM175A	0.00312	0.000716	-3.55177	-1.45395	-1.00257
223812_at	FAM178B	0.000167	2.36e-05	4.55376	1.81368	1.45371
231117_at	FAM181A	1.74e-05	1.82e-06	5.24418	4.3066	1.50648
1557211_a_at	FAM181A-AS1	0.0066	0.00178	3.25772	-2.31224	1.20584
223204_at	FAM198B	0.0131	0.00414	-2.97164	-3.0955	-1.08296
242348_at	FAM19A4	4.9e-17	3.69e-19	-12.6108	33.2538	-2.2574
236321_at	FAM200B	3.63e-07	2.5e-08	-6.33657	8.51276	-1.21822
222617_s_at	FAM204A	0.00365	0.000867	3.4914	-1.63435	1.01209
209284_s_at	FAM208A	4.08e-06	3.59e-07	5.6639	5.89203	1.2737
238795_at	FAM208B	4.19e-07	2.91e-08	6.29797	8.36028	1.02328
226804_at	FAM20A	5.01e-09	2.31e-10	-7.4886	13.1377	-1.95433
241981_at	FAM20A	0.0121	0.00375	-3.00614	-3.00389	-1.05052
242149_at	FAM210A	7.93e-15	9.89e-17	-11.1328	27.6979	-1.92893
1553710_at	FAM218A	0.0082	0.00232	3.17043	-2.55686	1.24797
228600_x_at	FAM221A	3e-05	3.34e-06	-5.08362	3.71283	-1.32633
216786_at	FAM224A	1.2e-12	2.42e-14	-9.73783	22.2291	-1.22235
229391_s_at	FAM26F	0.00205	0.000436	-3.70613	-0.983349	-1.45955
206478_at	FAM30A	3.71e-05	4.25e-06	5.0193	3.47721	2.14192
236316_at	FAM3C	0.00068	0.000119	-4.095	0.258004	-1.07627
227676_at	FAM3D	0.000238	3.52e-05	-4.44228	1.42741	-1.12371
224973_at	FAM46A	0.000381	6.07e-05	-4.28848	0.902953	-1.20223
230276_at	FAM49A	0.02	0.00698	-2.78582	-3.57486	-1.07097
217534_at	FAM49B	5.91e-05	7.18e-06	4.87902	2.96791	1.2422
236206_at	FAM53A	0.0124	0.00385	2.99693	-3.02844	1.06218
223038_s_at	FAM60A	0.00195	0.000409	3.72574	-0.922627	1.18816
220147_s_at	FAM60A	4.85e-05	5.74e-06	4.93903	3.18498	1.24363
221591_s_at	FAM64A	1.08e-05	1.06e-06	5.38602	4.83727	1.11016
218029_at	FAM65A	8.01e-05	1.02e-05	-4.78514	2.63082	-1.13091
209829_at	FAM65B	1.59e-06	1.27e-07	-5.92922	6.91559	-1.99341
206707_x_at	FAM65B	0.0151	0.00493	2.91081	-3.25505	1.08704
227654_at	FAM65C	2.76e-05	3.05e-06	-5.10785	3.80196	-1.80761
216044_x_at	FAM69A	7.26e-05	9.08e-06	-4.81544	2.73928	-1.24941
229002_at	FAM69B	0.000397	6.35e-05	4.27527	0.858369	1.07838
1564112_at	FAM71A	1.21e-05	1.21e-06	5.3508	4.70497	1.61014
237320_at	FAM71F2	0.00158	0.00032	3.80014	-0.690361	1.17461
241481_at	FAM81A	0.0169	0.00566	2.86129	-3.38307	1.33847
240065_at	FAM81B	0.001	0.000187	3.96135	-0.177225	1.77875
225687_at	FAM83D	6.83e-11	2.03e-12	8.64483	17.8323	2.82099
226129_at	FAM83H	6.73e-07	4.9e-08	6.16817	7.84915	1.33709
234335_s_at	FAM84A	1.14e-13	1.83e-15	-10.387	24.7979	-1.89318
1562903_at	FAM86B3P	9.22e-21	2.93e-23	-15.2913	42.616	-3.4279
220535_at	FAM90A1	3.17e-05	3.57e-06	5.06618	3.64882	1.08882
235391_at	FAM92A1	0.000822	0.000148	4.03097	0.048399	1.02981
1568889_at	FANCD2	3.14e-19	1.43e-21	-14.1562	38.7665	-3.67412
213008_at	FANCI	1.28e-07	7.93e-09	6.62104	9.64294	1.10561
223785_at	FANCI	0.00992	0.00293	3.09105	-2.77507	1.14989
213007_at	FANCI	2.15e-08	1.13e-09	7.10075	11.5686	1.28908
227996_at	FARP1	4.55e-05	5.33e-06	4.95878	3.25669	1.35741
204780_s_at	FAS	1.55e-11	3.99e-13	-9.04415	19.4468	-1.87894
215719_x_at	FAS	4.07e-08	2.24e-09	-6.93225	10.8899	-1.50246
214114_x_at	FASTK	0.000137	1.88e-05	4.61672	2.03404	1.2676
201579_at	FAT1	0.0179	0.00607	-2.83618	-3.44731	-1.03664
1558964_at	FAT3	7.6e-07	5.6e-08	-6.13457	7.71724	-1.40187
225258_at	FBLIM1	3.11e-18	1.8e-20	13.4401	36.2509	3.22564
202766_s_at	FBN1	0.0117	0.00357	-3.0235	-2.9575	-1.32738
238771_at	FBRS	5.68e-13	1.07e-14	-9.94118	23.0378	-1.46637
228522_at	FBRSL1	0.02	0.00699	2.78538	-3.57598	1.07979
239676_x_at	FBRSL1	1.31e-05	1.32e-06	5.32725	4.6167	1.54973
1557539_at	FBRSL1	8.16e-05	1.04e-05	4.77892	2.6086	2.06522
1556770_a_at	FBXL13	4.72e-09	2.16e-10	-7.50538	13.2057	-1.16069
1553683_s_at	FBXL14	1.26e-11	3.18e-13	9.0997	19.6707	1.47237
242034_at	FBXL17	0.000342	5.35e-05	4.3242	1.02383	1.52829
220896_at	FBXL18	0.0287	0.011	2.6189	-3.98461	1.04737
1553359_at	FBXL18	0.0026	0.000578	3.61902	-1.25056	1.06209
1553361_x_at	FBXL18	0.00362	0.000858	3.49482	-1.62418	1.15842
214436_at	FBXL2	5.17e-05	6.17e-06	-4.91989	3.11562	-1.21189
235089_at	FBXL20	0.000439	7.13e-05	4.24226	0.747316	1.10301
213249_at	FBXL7	4.94e-09	2.27e-10	-7.49238	13.153	-1.5425
231472_at	FBXO15	0.00403	0.000977	3.45345	-1.74667	1.39856
1559561_at	FBXO18	3.13e-05	3.51e-06	5.07781	3.66984	1.02762
1559214_at	FBXO22	3.54e-09	1.57e-10	-7.5831	13.521	-2.19371
229955_at	FBXO3	1.49e-07	9.4e-09	-6.57892	9.47496	-1.57059
233366_at	FBXO4	1.24e-09	4.91e-11	-7.8665	14.6719	-1.09291
1559566_at	FBXO42	2.47e-10	8.46e-12	-8.29559	16.4154	-1.03299
231769_at	FBXO6	0.00336	0.000785	3.52278	-1.54084	1.05705
243649_at	FBXO7	1.53e-12	3.18e-14	-9.6701	21.959	-1.47643
1554806_a_at	FBXO8	0.000169	2.38e-05	-4.55098	1.80398	-1.06324
209456_s_at	FBXW11	2.44e-07	1.6e-08	6.44637	8.94773	1.64406
231496_at	FCAMR	7.09e-26	5.71e-29	-19.5354	55.5824	-3.30348
1554899_s_at	FCER1G	1.91e-15	2.06e-17	-11.5402	29.2556	-2.53735
215567_at	FCF1	1.18e-12	2.38e-14	-9.74268	22.2485	-1.28455
203561_at	FCGR2A	1.39e-08	7.03e-10	-7.21641	12.0357	-1.52036
210889_s_at	FCGR2B	5.41e-07	3.85e-08	-6.22811	8.08486	-1.70394
204007_at	FCGR3B	4.59e-05	5.39e-06	-4.95605	3.24677	-1.61591
1554360_at	FCHSD2	8.22e-06	7.81e-07	5.46391	5.13098	1.23687
221602_s_at	FCMR	3.09e-09	1.35e-10	7.62011	13.6712	2.17998
205237_at	FCN1	8.77e-13	1.73e-14	-9.82181	22.5635	-2.12907
224192_at	FCRL2	2.49e-13	4.29e-15	-10.1718	23.9506	-1.4139
224402_s_at	FCRL4	0.00277	0.000624	3.59492	-1.32373	1.1177
235372_at	FCRLA	0.00119	0.00023	3.90037	-0.372889	1.32101
212373_at	FEM1B	9.74e-06	9.41e-07	-5.41574	4.94914	-1.45531
204768_s_at	FEN1	1.45e-05	1.47e-06	5.29888	4.51058	1.22032
204767_s_at	FEN1	0.000507	8.41e-05	4.19487	0.588766	1.39185
227579_at	FER	1.05e-07	6.39e-09	-6.67414	9.85499	-1.58161
229545_at	FERMT1	0.0223	0.00798	2.73701	-3.69677	1.09919
215000_s_at	FEZ2	0.0023	0.000498	-3.6649	-1.11035	-1.1096
233897_at	FEZF2	2.69e-14	3.84e-16	-10.7839	26.3487	-1.48738
1565752_at	FGD2	1.09e-05	1.07e-06	5.38249	4.82399	1.17859
226984_at	FGD5	0.00426	0.00105	3.43168	-1.81071	1.08158
205117_at	FGF1	8.2e-13	1.6e-14	-9.84094	22.6396	-2.21628
208240_s_at	FGF1	0.0274	0.0103	2.64051	-3.9327	1.14349
207501_s_at	FGF12	0.000535	8.94e-05	-4.17713	0.529688	-1.05653
205110_s_at	FGF13	1.15e-11	2.88e-13	-9.12412	19.7692	-2.80257
230351_at	FGF14-AS2	1.63e-05	1.68e-06	-5.2639	4.38004	-1.87165
206987_x_at	FGF18	0.00111	0.00021	3.92685	-0.288154	1.21962
211029_x_at	FGF18	0.000337	5.26e-05	4.32892	1.03984	1.23751
231382_at	FGF18	2.99e-05	3.33e-06	5.08459	3.71639	1.39458
221433_at	FGF21	1.06e-07	6.48e-09	-6.67084	9.84181	-1.0475
231031_at	FGF7P3	2.08e-08	1.09e-09	-7.10978	11.6051	-1.3264
239178_at	FGF9	1.76e-06	1.42e-07	-5.90062	6.80456	-2.82175
206404_at	FGF9	4.37e-07	3.05e-08	-6.28665	8.31559	-2.52829
205014_at	FGFBP1	7.91e-08	4.68e-09	6.75094	10.1622	1.16809
222164_at	FGFR1	9.66e-10	3.75e-11	-7.93187	14.9375	-1.81209
211535_s_at	FGFR1	0.0356	0.0144	-2.51536	-4.22846	-1.06101
236808_at	FGFR1OP2	3.02e-12	6.69e-14	-9.4853	21.2201	-1.91972
1556283_s_at	FGFR1OP2	0.00108	0.000204	-3.93485	-0.262489	-1.14692
243619_at	FGFR1OP2	4.51e-09	2.04e-10	-7.51854	13.2591	-1.09365
223263_s_at	FGFR1OP2	0.00149	0.000299	-3.82059	-0.626009	-1.0837
203639_s_at	FGFR2	0.0077	0.00215	3.19611	-2.48539	1.1961
208228_s_at	FGFR2	0.00595	0.00157	3.29961	-2.19316	1.25368
232380_at	FGGY	1.36e-05	1.38e-06	-5.31637	4.57599	-1.2656
227265_at	FGL2	0.0105	0.00313	-3.06885	-2.83534	-1.36331
204834_at	FGL2	0.00137	0.000269	-3.85266	-0.524654	-1.18177
208438_s_at	FGR	1.69e-06	1.36e-07	-5.91155	6.84699	-1.03984
226599_at	FHDC1	0.00364	0.000862	3.49304	-1.62947	1.18199
210299_s_at	FHL1	2.69e-07	1.78e-08	-6.42035	8.84453	-1.65459
220170_at	FHL5	0.0121	0.00375	3.00677	-3.00222	1.21639
235183_at	FILIP1	0.00347	0.000815	3.51085	-1.57646	1.38609
1570515_a_at	FILIP1	0.000925	0.00017	3.98947	-0.08638	1.88886
231945_at	FILIP1	4.18e-11	1.18e-12	8.77741	18.3691	2.15126
229567_at	FITM1	1.58e-28	7.52e-32	-21.9557	62.0694	-2.31471
226967_at	FIZ1	0.000404	6.49e-05	4.26911	0.83762	1.03185
219522_at	FJX1	1.07e-09	4.21e-11	7.90377	14.8233	1.79854
219118_at	FKBP11	1.35e-08	6.8e-10	-7.22483	12.0697	-1.61709
219117_s_at	FKBP11	0.00264	0.000589	-3.61273	-1.26969	-1.2197
239351_at	FKBP3	2.05e-10	6.87e-12	-8.34639	16.6217	-1.68251
224840_at	FKBP5	0.00101	0.000189	-3.95757	-0.189426	-1.10593
222007_s_at	FKBP8	8.2e-11	2.48e-12	-8.59554	17.6325	-1.32149
219187_at	FKBPL	6.27e-07	4.53e-08	6.18781	7.92632	1.11966
208120_x_at	FKSG49	9.64e-11	2.97e-12	8.55177	17.4551	2.26116
212541_at	FLAD1	3e-05	3.35e-06	5.08301	3.71059	1.12407
235250_at	FLCN	0.0169	0.00568	2.86002	-3.38632	1.09863
1569410_at	FLG2	3.01e-05	3.36e-06	-5.0821	3.70725	-1.32578
241014_at	FLG-AS1	0.000834	0.00015	-4.02567	0.031155	-1.22764
236164_at	FLJ10038	0.000284	4.33e-05	-4.38409	1.22777	-1.19088
220529_at	FLJ11710	7.49e-16	7.34e-18	-11.8117	30.2829	-1.89668
220211_at	FLJ13224	0.000102	1.34e-05	-4.71037	2.36459	-1.12506
243077_at	FLJ16734	2.42e-05	2.62e-06	-5.14773	3.94898	-1.01553
234216_at	FLJ21408	0.00785	0.0022	3.18822	-2.5074	1.04604
1557895_at	FLJ35934	1.82e-07	1.17e-08	-6.52549	9.26217	-1.27913
244395_at	FLJ41455	5.37e-09	2.49e-10	7.47029	13.0634	2.77089
207876_s_at	FLNC	2.97e-15	3.33e-17	-11.4151	28.7793	-1.90922
210142_x_at	FLOT1	0.00018	2.56e-05	4.5313	1.73546	1.10127
219250_s_at	FLRT3	7.85e-09	3.76e-10	-7.3693	12.6542	-2.67443
222853_at	FLRT3	2.44e-07	1.6e-08	-6.4466	8.94864	-2.0539
222033_s_at	FLT1	1.23e-05	1.22e-06	5.34719	4.69143	1.03965
226497_s_at	FLT1	0.000572	9.68e-05	4.15416	0.453368	1.04823
210316_at	FLT4	1.27e-06	9.92e-08	-5.99065	7.15462	-1.00025
225952_at	FLYWCH1	0.00983	0.00289	3.0954	-2.76322	1.17455
1555471_a_at	FMN2	0.000968	0.000179	-3.97428	-0.135492	-1.3602
1569257_at	FMNL1	6.54e-06	6.05e-07	-5.53013	5.3819	-1.06793
228268_at	FMO2	0.000252	3.76e-05	4.42372	1.36359	1.4084
202709_at	FMOD	0.00307	0.000704	-3.55703	-1.43815	-1.11175
1559060_a_at	FNIP1	2.62e-09	1.12e-10	-7.66472	13.8523	-1.73362
243861_at	FNIP1	5.68e-08	3.24e-09	-6.84174	10.5262	-1.50257
223997_at	FNIP1	5.91e-08	3.38e-09	-6.83122	10.484	-1.4224
1569352_at	FNIP2	2.84e-08	1.52e-09	-7.02689	11.2708	-1.18513
230808_at	FNTA	3.47e-09	1.53e-10	-7.58862	13.5434	-1.26406
204437_s_at	FOLR1	7.57e-12	1.82e-13	9.23779	20.2267	3.55397
209189_at	FOS	0.000463	7.58e-05	-4.22458	0.688057	-1.48059
210103_s_at	FOXA2	1.03e-05	9.98e-07	5.40053	4.89184	1.98846
241609_at	FOXD3	0.0105	0.00313	3.07018	-2.83373	1.04268
206377_at	FOXF2	5.9e-14	9e-16	10.567	25.5031	3.46393
207644_at	FOXH1	0.0179	0.00611	2.83426	-3.45222	1.51316
205906_at	FOXJ1	0.00437	0.00108	3.42157	-1.84035	1.03979
217310_s_at	FOXJ3	1.12e-06	8.66e-08	-6.02484	7.28793	-1.23895
226224_at	FOXK2	5.22e-06	4.72e-07	-5.59397	5.62483	-1.25434
203064_s_at	FOXK2	7.72e-05	9.75e-06	4.79637	2.67097	1.22025
220102_at	FOXL2	8.32e-07	6.22e-08	-6.10834	7.61443	-2.00112
202580_x_at	FOXM1	3.08e-13	5.41e-15	10.1134	23.72	3.26423
218031_s_at	FOXN3	7.07e-06	6.6e-07	-5.50746	5.29587	-1.24594
205021_s_at	FOXN3	0.00424	0.00104	3.43415	-1.80346	1.40637
202723_s_at	FOXO1	0.00601	0.00159	3.29565	-2.20447	1.00876
1558996_at	FOXP1	2.77e-06	2.34e-07	-5.77321	6.31195	-1.24967
232096_x_at	FOXP1-IT1	8.17e-25	9.56e-28	-18.5675	52.8129	-3.17785
1552902_a_at	FOXP2	3.45e-14	5.03e-16	-10.7153	26.0817	-1.86647
243278_at	FOXP2	2.35e-05	2.55e-06	-5.15528	3.97688	-1.42342
1564876_s_at	FOXP2	0.00156	0.000314	-3.80625	-0.671174	-1.06617
1555648_at	FOXP2	3.68e-07	2.53e-08	-6.33294	8.49842	-1.03634
238898_at	FOXP4-AS1	3.4e-05	3.84e-06	5.0462	3.57559	1.15674
227475_at	FOXQ1	1.32e-08	6.64e-10	7.2305	12.0926	2.71454
233250_x_at	FOXRED2	0.00159	0.000322	3.79882	-0.694512	1.03029
205118_at	FPR1	1.33e-12	2.72e-14	-9.70916	22.1148	-1.5125
230422_at	FPR3	1.38e-06	1.08e-07	-5.96831	7.0676	-1.41984
244767_at	FRA10AC1	3.39e-17	2.45e-19	-12.7216	33.6597	-2.77571
226145_s_at	FRAS1	6.43e-07	4.66e-08	-6.18074	7.89851	-2.79434
236031_x_at	FREM1	3.03e-07	2.04e-08	-6.38696	8.71219	-1.24301
234949_at	FRG1BP	1.38e-05	1.4e-06	-5.31303	4.56349	-1.48072
242249_at	FRG1EP	7.48e-14	1.16e-15	10.5017	25.2479	2.52652
242331_x_at	FRG1JP	0.000521	8.69e-05	-4.18536	0.557069	-1.29287
229893_at	FRMD3	0.00329	0.000765	3.53115	-1.51581	1.57808
213056_at	FRMD4B	0.00309	0.000708	-3.55517	-1.44374	-1.03993
225481_at	FRMD6	0.00273	0.000612	-3.60111	-1.30497	-1.34662
225464_at	FRMD6	7.99e-05	1.01e-05	-4.78571	2.63284	-1.22357
233106_at	FRMD6-AS1	1.93e-17	1.31e-19	-12.8923	34.2813	-1.55033
206774_at	FRMPD1	1.7e-09	7.01e-11	-7.77958	14.3188	-1.44845
236688_at	FRMPD3	3.5e-12	7.86e-14	9.44557	21.061	3.00078
1558414_at	FRRS1L	0.00565	0.00147	3.32065	-2.13293	1.41864
219907_at	FRS3	1.56e-07	9.88e-09	6.56661	9.42591	1.80456
204072_s_at	FRY	1.29e-07	7.98e-09	-6.6195	9.63679	-2.56318
1555904_at	FRY	2.27e-11	6.06e-13	-8.9411	19.0309	-1.18902
242807_at	FSD1L	0.000268	4.04e-05	4.40353	1.29431	1.00826
233741_at	FTCD	1.02e-21	2.56e-24	16.0293	45.0292	1.58175
218103_at	FTSJ3	5.57e-10	2.05e-11	8.07963	15.538	2.08821
242121_at	FTX	3.73e-10	1.32e-11	-8.18697	15.9742	-1.69769
239020_at	FUT10	0.0109	0.0033	3.05027	-2.88555	1.27878
214088_s_at	FUT3	2.86e-06	2.43e-07	5.76417	6.27712	2.29074
1565659_at	FUT6	0.00822	0.00233	3.16931	-2.55994	1.04614
1565660_at	FUT6	0.038	0.0156	2.48278	-4.30352	1.48714
1565661_x_at	FUT6	3.23e-11	8.87e-13	8.84776	18.6537	3.86396
210506_at	FUT7	0.00631	0.00169	-3.27578	-2.26105	-1.13041
203988_s_at	FUT8	8.99e-05	1.16e-05	4.74858	2.50037	1.33789
214046_at	FUT9	2.1e-10	7.09e-12	-8.33876	16.5907	-1.92351
203172_at	FXR2	4.85e-10	1.76e-11	8.11643	15.6875	2.48261
[truncated: 4,306 more rows]
