# Supplementary material for: The Identification of RNA Modification Gene PUS7 as a Potential Biomarker of Ovarian Cancer
Source: Biology (Basel). 2021 Nov 3;10(11):1130. doi: 10.3390/biology10111130 (PMC8615213; doi:10.3390/biology10111130)
Supplement: Supplementary file 1 [file biology-10-01130-s001.zip › Supplementary files/Supplementary table3.xlsx]

## Sheet: Sheet1
RNA modification-related genes
Gene symbols
ADAD1
ADAD2
ADAR
ADARB1
ADARB2
ADAT1
ADAT2
ADAT3
ALKBH1
ALKBH2
ALKBH5
ALKBH8
ALYREF
CAPRIN1
CDK5RAP1
CDKAL1
CHTOP
CMTR1
CMTR2
CNOT7
CTU1
DGCR8
DNMT1
DNMT3A
DNMT3B
DNMT3L
EGR1
EIF3A
EIF3B
ELAVL1
ELP1
ELP3
ELP4
EMG1
ERH
FMR1
FTO
FTSJ1
FTSJ2
FTSJ3
G3BP1
G3BP2
GTPB3
GTPBP3
HMCES
HNRNPA2B1
HNRNPC1
HNRNPC2
HSD17B10
LRPPRC
MECP2
METTL1
METTL14
METTL2A
METTL2B
METTL3
METTL4
METTL6
METTL8
MGME1
MRM1
MRM3
MTO1
NAT10
NEIL1
NEWENTRY
NFIA
NSUN1
NSUN2
NSUN3
NSUN4
NSUN5
NSUN5P1
NSUN5P2
NSUN6
NSUN7
PRMT1
PRMT5
PRORP
PUS1
PUS3
PUS7
RBM15
RBM15B
RBM42
RBMX
RNGTT
RNMT
RPUSD2
RRP8
SMUG1
SNORA13
SRSF2
TARBP1
TDG
TET1
TET2
TET3
THYN1
TRDMT1
TRIT1
TRM6
TRMT1
TRMT10A
TRMT10B
TRMT10C
TRMT11
TRMT112
TRMT12
TRMT13
TRMT1L
TRMT2A
TRMT2B1
TRMT5
TRMT6
TRMT61A
TRMT61B
TRMT9B
UHRF1
USP10
VIRMA
WDR4
WDR76
WDR77
WT1
WTAP
YTHDC1
YTHDC2
YTHDF1
YTHDF2
YTHDF3
ZC3H13
