# Supplementary material for: The Identification of RNA Modification Gene PUS7 as a Potential Biomarker of Ovarian Cancer
Source: Biology (Basel). 2021 Nov 3;10(11):1130. doi: 10.3390/biology10111130 (PMC8615213; doi:10.3390/biology10111130)
Supplement: Supplementary file 1 [file biology-10-01130-s001.zip › Supplementary files/Supplementary table4.xls]

## Sheet: Sheet1
The genes correlated to PUS7
Correlated Gene	Spearman's Correlation	p-Value	q-Value
DNAJC2	0.660971	4.80421e-39	9.13377e-35
CBLL1	0.654289	4.87612e-38	4.63524e-34
RINT1	0.629337	1.70203e-34	1.07864e-30
SRPK2	0.609093	7.53083e-32	3.5794e-28
COG5	0.595941	3.13632e-30	1.19255e-26
KRIT1	0.594803	4.29635e-30	1.36137e-26
ORC5	0.570499	2.67e-27	7.25173e-24
RBM28	0.569249	3.6648e-27	8.70941e-24
ZNF3	0.566557	7.21222e-27	1.52354e-23
PMPCB	0.557096	7.42173e-26	1.41102e-22
PEX1	0.550311	3.77543e-25	6.52531e-22
ARMC10	0.541928	2.67772e-24	4.2424e-21
DLD	0.541171	3.18757e-24	4.6617e-21
GTPBP10	0.536503	9.24327e-24	1.18328e-20
TNPO3	0.536459	9.33577e-24	1.18328e-20
FAM185A	0.529487	4.44125e-23	5.27731e-20
SLC25A13	0.515436	9.242e-22	1.03358e-18
METTL2B	0.514538	1.11681e-21	1.1796e-18
ZSCAN25	0.512687	1.64697e-21	1.64801e-18
DUS4L	0.503601	1.07095e-20	1.01804e-17
PTCD1	0.501533	1.62732e-20	1.47327e-17
KMT2E	0.500952	1.82949e-20	1.58101e-17
ZKSCAN5	0.499903	2.25843e-20	1.86684e-17
TTC26	0.497445	3.69058e-20	2.92355e-17
MTERF1	0.496214	4.71204e-20	3.58341e-17
FAM200A	0.495282	5.66563e-20	4.14289e-17
ZC3HAV1L	0.493017	8.84773e-20	6.23011e-17
TRRAP	0.482393	6.85407e-19	4.65391e-16
GATAD1	0.47846	1.43656e-18	9.41788e-16
ING3	0.476766	1.97014e-18	1.24854e-15
CPSF4	0.473465	3.62725e-18	2.22456e-15
MCM7	0.469977	6.86464e-18	4.07846e-15
UBN2	0.466836	1.21156e-17	6.98006e-15
PRKRIP1	0.465012	1.68067e-17	9.39789e-15
NAA25	0.464188	1.94722e-17	1.05773e-14
DBF4	0.463722	2.11581e-17	1.11738e-14
XPO5	0.460968	3.44854e-17	1.77199e-14
AGK	0.45815	5.65821e-17	2.83089e-14
VPS50	0.455694	8.67968e-17	4.23123e-14
NUP205	0.454459	1.07495e-16	5.10926e-14
ZSCAN21	0.453921	1.17947e-16	5.46928e-14
MKLN1	0.452902	1.40576e-16	6.36341e-14
NOM1	0.451864	1.68008e-16	7.42829e-14
FAM133B	0.45047	2.13216e-16	9.21289e-14
ATXN7L1	0.449926	2.33928e-16	9.8832e-14
PAXIP1	0.448946	2.76312e-16	1.11982e-13
ACTR3B	0.448935	2.76833e-16	1.11982e-13
ANAPC1	0.448498	2.98146e-16	1.18091e-13
LMTK2	0.446934	3.88367e-16	1.50686e-13
ABCF2	0.442781	7.78439e-16	2.95994e-13
XRCC2	0.442317	8.4091e-16	3.13478e-13
LUC7L2	0.440632	1.11154e-15	4.06398e-13
PPP1R9A	0.438501	1.57836e-15	5.66184e-13
CCT6P1	0.434866	2.85486e-15	1.00512e-12
METTL8	0.434555	3.00196e-15	1.03769e-12
PFAS	0.434265	3.14628e-15	1.06816e-12
POM121	0.432139	4.43174e-15	1.47818e-12
ZKSCAN1	0.431706	4.75088e-15	1.55731e-12
FBXL13	0.426651	1.06146e-14	3.42041e-12
CFAP69	0.424147	1.57286e-14	4.98387e-12
TYW1	0.419677	3.14838e-14	9.81263e-12
TMEM209	0.419432	3.26941e-14	1.00255e-11
CSE1L	0.418773	3.61824e-14	1.0919e-11
COPG2	0.418206	3.94678e-14	1.17244e-11
RBM48	0.416182	5.37758e-14	1.5729e-11
PNPLA8	0.414905	6.52991e-14	1.88101e-11
ANKIB1	0.414717	6.71874e-14	1.90652e-11
ZNF212	0.413846	7.66569e-14	2.14324e-11
RSBN1L	0.413291	8.33596e-14	2.29686e-11
SLC25A40	0.411388	1.10975e-13	2.95966e-11
TAF6	0.411336	1.11843e-13	2.95966e-11
THAP5	0.411322	1.12085e-13	2.95966e-11
PDAP1	0.410581	1.25228e-13	3.22333e-11
DHX33	0.410569	1.25461e-13	3.22333e-11
POM121C	0.409285	1.51949e-13	3.85181e-11
LRWD1	0.408967	1.593e-13	3.98501e-11
ZNF394	0.406137	2.42173e-13	5.97946e-11
ZNF786	0.40528	2.74694e-13	6.69548e-11
KLHL23	0.404659	3.00907e-13	7.24157e-11
POLR1B	0.40412	3.25627e-13	7.73853e-11
WASL	0.40261	4.05898e-13	9.52707e-11
CCDC138	0.400413	5.58217e-13	1.28342e-10
DCAF17	0.400388	5.603e-13	1.28342e-10
NAPEPLD	0.396528	9.75131e-13	2.20705e-10
URB2	0.395523	1.12521e-12	2.51677e-10
ZNF800	0.395194	1.17896e-12	2.60633e-10
ZNF655	0.393443	1.51068e-12	3.30126e-10
ZNF92	0.392857	1.64087e-12	3.54503e-10
MTIF2	0.391462	1.99634e-12	4.26453e-10
SND1	0.389038	2.80057e-12	5.91604e-10
KIAA1147	0.388642	2.95884e-12	6.1817e-10
SPDYE3	0.388058	3.20878e-12	6.63101e-10
CLDN12	0.386975	3.72733e-12	7.53872e-10
BMT2	0.386824	3.80591e-12	7.61663e-10
NCAPG2	0.386403	4.03342e-12	7.90549e-10
WDR12	0.384263	5.41117e-12	1.04977e-09
MEPCE	0.383637	5.89458e-12	1.132e-09
GTF2I	0.383143	6.30561e-12	1.19882e-09
SSB	0.38056	8.95367e-12	1.6368e-09
TSR1	0.379458	1.03892e-11	1.86942e-09
POT1	0.379434	1.04228e-11	1.86942e-09
CASP2	0.379242	1.06956e-11	1.90042e-09
WDR60	0.379132	1.0854e-11	1.91071e-09
RIF1	0.378078	1.25048e-11	2.1811e-09
XPO1	0.377287	1.38995e-11	2.35943e-09
ZRANB3	0.377015	1.44137e-11	2.42508e-09
IMPDH1	0.376796	1.48414e-11	2.47513e-09
GCC1	0.375868	1.67951e-11	2.77659e-09
EXOC4	0.375534	1.75568e-11	2.8775e-09
GMCL1	0.374571	1.99488e-11	3.24159e-09
ORC2	0.373765	2.21926e-11	3.57565e-09
TTF2	0.373096	2.42392e-11	3.87257e-09
EFCAB10	0.37256	2.60108e-11	4.12098e-09
DMTF1	0.372184	2.73282e-11	4.29392e-09
ZNF107	0.371709	2.9085e-11	4.49565e-09
ATXN8	0.370225	3.53133e-11	5.41432e-09
IFRD1	0.370111	3.58432e-11	5.45161e-09
GART	0.368167	4.614e-11	6.83134e-09
PUS1	0.368132	4.63519e-11	6.83134e-09
DDX21	0.36797	4.73357e-11	6.92266e-09
CUL1	0.366382	5.81004e-11	8.43209e-09
ZNF789	0.366047	6.06578e-11	8.6651e-09
WDR3	0.366018	6.08856e-11	8.6651e-09
ZC3HC1	0.365937	6.15289e-11	8.6651e-09
AKAP9	0.365436	6.56127e-11	9.17227e-09
BAZ1B	0.364733	7.17988e-11	9.90341e-09
LMBR1	0.364724	7.18846e-11	9.90341e-09
RBM33	0.364306	7.58298e-11	1.03718e-08
KIAA1549	0.363741	8.15008e-11	1.09893e-08
CNOT4	0.363091	8.8542e-11	1.18547e-08
NOC3L	0.361691	1.05756e-10	1.40603e-08
CCT6A	0.361274	1.11485e-10	1.46176e-08
NUP107	0.360267	1.266e-10	1.63736e-08
GIGYF1	0.359936	1.31998e-10	1.69564e-08
ATP6V0A2	0.359601	1.37667e-10	1.75309e-08
SBNO1	0.359564	1.38314e-10	1.75309e-08
ADAT2	0.359273	1.43459e-10	1.79678e-08
TMEM168	0.358802	1.52204e-10	1.89131e-08
PSMC2	0.357578	1.77392e-10	2.13466e-08
LRPPRC	0.357577	1.77402e-10	2.13466e-08
UTP20	0.357446	1.80329e-10	2.15623e-08
LTV1	0.357196	1.86056e-10	2.21081e-08
NUP43	0.356856	1.94087e-10	2.29191e-08
SLC37A3	0.356675	1.98518e-10	2.32977e-08
AP4M1	0.356289	2.08274e-10	2.39982e-08
HK2	0.356166	2.11502e-10	2.41061e-08
ZC3H8	0.356156	2.11746e-10	2.41061e-08
HEATR1	0.355918	2.18112e-10	2.4683e-08
ATAD5	0.355797	2.21409e-10	2.49078e-08
DNA2	0.355688	2.2442e-10	2.5098e-08
SYPL1	0.355389	2.32897e-10	2.57432e-08
NUP155	0.354955	2.45759e-10	2.70079e-08
MPHOSPH10	0.354723	2.52912e-10	2.76343e-08
PRKDC	0.353963	2.77758e-10	2.98347e-08
CRCP	0.35383	2.82361e-10	2.99902e-08
WDR43	0.353719	2.86252e-10	3.02346e-08
SPDYE6	0.352773	3.21576e-10	3.35923e-08
DDX55	0.352462	3.3407e-10	3.47068e-08
RABGEF1	0.351707	3.66459e-10	3.74583e-08
ESF1	0.3517	3.66758e-10	3.74583e-08
ZNF277	0.351679	3.67676e-10	3.74583e-08
NOLC1	0.351319	3.84236e-10	3.86513e-08
PMS1	0.349619	4.72613e-10	4.67985e-08
KMT2C	0.349573	4.75275e-10	4.68183e-08
AHCYL2	0.349515	4.78594e-10	4.69022e-08
R3HDM1	0.34929	4.91883e-10	4.77126e-08
SMARCC1	0.347908	5.81386e-10	5.55442e-08
KLHDC10	0.347503	6.10479e-10	5.77435e-08
SPDYE8P	0.347035	6.45836e-10	6.07853e-08
STAG3L1	0.346598	6.80738e-10	6.34421e-08
ARPC1A	0.346287	7.06605e-10	6.55316e-08
UBE2H	0.346199	7.14109e-10	6.5906e-08
BAIAP2L1	0.345344	7.91129e-10	7.26616e-08
DDX18	0.345059	8.18528e-10	7.41041e-08
PMS2P3	0.344682	8.56257e-10	7.67885e-08
WDR75	0.344474	8.77692e-10	7.79752e-08
CAD	0.34365	9.68193e-10	8.52189e-08
SPDYE5	0.342509	1.10859e-09	9.62399e-08
SRRT	0.342295	1.13694e-09	9.82523e-08
KIAA0753	0.342228	1.146e-09	9.85873e-08
TARBP1	0.341915	1.18919e-09	1.01385e-07
ANKLE1	0.341877	1.19457e-09	1.01389e-07
DHX37	0.341508	1.24774e-09	1.04965e-07
PPP4R2	0.341391	1.26513e-09	1.05959e-07
SHPRH	0.341283	1.28135e-09	1.06847e-07
POLR3B	0.340057	1.4801e-09	1.21816e-07
C1ORF109	0.339647	1.55305e-09	1.2727e-07
GTF2H3	0.339112	1.65348e-09	1.34488e-07
XRN2	0.338618	1.75172e-09	1.41061e-07
HSPD1	0.338558	1.76394e-09	1.41061e-07
UBA2	0.338549	1.76586e-09	1.41061e-07
NCL	0.33784	1.91817e-09	1.50695e-07
UBE3C	0.337465	2.00361e-09	1.5676e-07
CCAR1	0.33686	2.14948e-09	1.67483e-07
HNRNPR	0.336667	2.19812e-09	1.70574e-07
KCNJ14	0.33628	2.29909e-09	1.77684e-07
FAM133CP	0.33596	2.38584e-09	1.83642e-07
TRMT6	0.335322	2.56843e-09	1.96006e-07
SUPV3L1	0.335291	2.5774e-09	1.96006e-07
GLMN	0.333201	3.27736e-09	2.42448e-07
PANK1	0.33309	3.31949e-09	2.43669e-07
NDUFB2-AS1	0.332944	3.37552e-09	2.46596e-07
DHX9	0.332918	3.38532e-09	2.46596e-07
EIF5B	0.332854	3.41037e-09	2.47473e-07
CASD1	0.331875	3.81362e-09	2.73602e-07
STX1A	0.331621	3.9257e-09	2.80584e-07
TAF1A	0.331536	3.96401e-09	2.82261e-07
MRE11	0.330445	4.48704e-09	3.15954e-07
WAPL	0.330026	4.70529e-09	3.26485e-07
TTPAL	0.329835	4.80819e-09	3.29653e-07
SLC12A9	0.329813	4.8203e-09	3.29653e-07
NRCAM	0.32975	4.85459e-09	3.30808e-07
PTCD3	0.329427	5.03521e-09	3.40674e-07
DHX57	0.329318	5.09753e-09	3.42453e-07
LUZP6	0.329239	5.14302e-09	3.44292e-07
PNPT1	0.329013	5.27629e-09	3.50744e-07
MYBBP1A	0.327367	6.34917e-09	4.17683e-07
PDK1	0.326681	6.85631e-09	4.47946e-07
LOC155060	0.326632	6.89391e-09	4.4886e-07
NOP58	0.326514	6.98563e-09	4.53279e-07
PKP4	0.325557	7.77342e-09	5.02045e-07
DARS2	0.325259	8.03551e-09	5.14381e-07
TTC21B	0.325061	8.21429e-09	5.20567e-07
PPIL4	0.324707	8.54414e-09	5.39672e-07
RPP40	0.324574	8.67117e-09	5.45882e-07
SSX2IP	0.324436	8.80436e-09	5.52437e-07
COA7	0.324054	9.18555e-09	5.72576e-07
SASS6	0.323816	9.43161e-09	5.85993e-07
WDR35	0.323763	9.48653e-09	5.87485e-07
ZNF138	0.323659	9.59636e-09	5.92357e-07
BRAF	0.323521	9.74466e-09	5.99565e-07
NOL9	0.323289	9.99782e-09	6.09226e-07
SNHG4	0.322902	1.0434e-08	6.2975e-07
SRPK1	0.322429	1.09924e-08	6.58351e-07
HOOK1	0.322415	1.10091e-08	6.58351e-07
ADNP	0.322409	1.10167e-08	6.58351e-07
CHERP	0.322384	1.10464e-08	6.58351e-07
CCDC18	0.32175	1.18447e-08	7.0372e-07
ZFYVE9	0.321539	1.21231e-08	7.16219e-07
IDE	0.320904	1.2997e-08	7.60307e-07
SF3B1	0.320351	1.38077e-08	7.95492e-07
SKP2	0.319601	1.49863e-08	8.47973e-07
PILRB	0.319394	1.53276e-08	8.64713e-07
SCML2	0.318442	1.69996e-08	9.47793e-07
LRGUK	0.318371	1.71311e-08	9.5233e-07
ALKBH4	0.318097	1.76478e-08	9.78193e-07
CCNT2	0.317431	1.89681e-08	1.04832e-06
ZBTB2	0.317219	1.94089e-08	1.06957e-06
ZNF26	0.316976	1.99234e-08	1.09475e-06
ZNF146	0.315721	2.28081e-08	1.23893e-06
POLR1A	0.315668	2.29381e-08	1.24245e-06
SLC5A6	0.315468	2.34374e-08	1.2623e-06
VKORC1L1	0.315281	2.39129e-08	1.28065e-06
TTLL4	0.315199	2.41248e-08	1.28837e-06
ARFGEF2	0.314858	2.50216e-08	1.3288e-06
GS1-124K5.11	0.31477	2.52586e-08	1.33765e-06
NAMPT	0.314091	2.71631e-08	1.42266e-06
CSNK2A3	0.313297	2.95621e-08	1.53561e-06
ZNF507	0.312908	3.08117e-08	1.58751e-06
RIOK1	0.312595	3.18568e-08	1.63692e-06
PDCD11	0.312435	3.24029e-08	1.6565e-06
LOC285074	0.312432	3.24121e-08	1.6565e-06
CEP83	0.312208	3.31919e-08	1.69181e-06
MCM8	0.311491	3.58114e-08	1.81559e-06
RPAP2	0.311454	3.59515e-08	1.81784e-06
ASUN	0.311271	3.66528e-08	1.84839e-06
SND1-IT1	0.311243	3.67649e-08	1.84914e-06
PHF10	0.3109	3.81185e-08	1.90713e-06
CEP41	0.310574	3.94536e-08	1.96874e-06
PRPF40A	0.310504	3.97468e-08	1.97818e-06
AGMAT	0.310019	4.18296e-08	2.07641e-06
PGAM5	0.309404	4.46237e-08	2.19221e-06
ZMYM4	0.308968	4.67124e-08	2.28302e-06
FBXO41	0.308935	4.68737e-08	2.28503e-06
MARS2	0.30885	4.72924e-08	2.29732e-06
KIF20B	0.308536	4.88747e-08	2.35713e-06
DENR	0.308337	4.99035e-08	2.39587e-06
ANKRD7	0.307883	5.23254e-08	2.48702e-06
NUP133	0.307662	5.35471e-08	2.53243e-06
PTPN11	0.307163	5.64089e-08	2.62831e-06
ZWILCH	0.30714	5.65422e-08	2.62831e-06
GCN1	0.306934	5.77662e-08	2.67866e-06
PODXL	0.306872	5.81386e-08	2.68937e-06
SNRNP200	0.306714	5.91031e-08	2.72735e-06
USP24	0.306564	6.0033e-08	2.75062e-06
FAM35A	0.306461	6.06795e-08	2.77317e-06
CEBPZ	0.306333	6.14885e-08	2.79002e-06
REV3L	0.306222	6.22045e-08	2.80244e-06
CCDC150	0.305447	6.73998e-08	3.01507e-06
CBFA2T2	0.305048	7.02392e-08	3.12007e-06
KMT5B	0.304662	7.30996e-08	3.22793e-06
ZNF282	0.304651	7.31767e-08	3.22793e-06
PMS2P1	0.304458	7.46468e-08	3.27756e-06
ST7	0.304323	7.56983e-08	3.30845e-06
ANAPC5	0.304223	7.64806e-08	3.31821e-06
DDX11	0.304201	7.66524e-08	3.31821e-06
ANKRD27	0.304161	7.69687e-08	3.31821e-06
ZNHIT6	0.30361	8.14578e-08	3.49588e-06
EYA3	0.303221	8.478e-08	3.60376e-06
CPSF6	0.30315	8.53946e-08	3.61368e-06
BRAP	0.303134	8.55332e-08	3.61368e-06
ARID1B	0.302939	8.72655e-08	3.67759e-06
KRBA1	0.30292	8.74326e-08	3.67759e-06
ANAPC7	0.302659	8.98007e-08	3.76885e-06
TCEB3	0.30255	9.08113e-08	3.80108e-06
TRIM24	0.302138	9.47149e-08	3.9403e-06
MGA	0.301698	9.90758e-08	4.09485e-06
LOC642846	0.301119	1.05089e-07	4.33394e-06
EPB41	0.300812	1.08424e-07	4.45163e-06
ST7-OT4	0.300738	1.09243e-07	4.46651e-06
PMS2P2	0.300266	1.14615e-07	4.64617e-06
PPIG	0.300218	1.15163e-07	4.65848e-06
